# Supplementary material for: Astronomically-paced climate and carbon-cycle feedbacks in the lead-up to the Late Devonian Kellwasser Crisis
Source: Copernicus journal article supplement (doi:10.5194/cp-2023-58), 2023-07-19
Supplement: Supplementary file [file cp-2023-58-AC2-supplement.pdf]

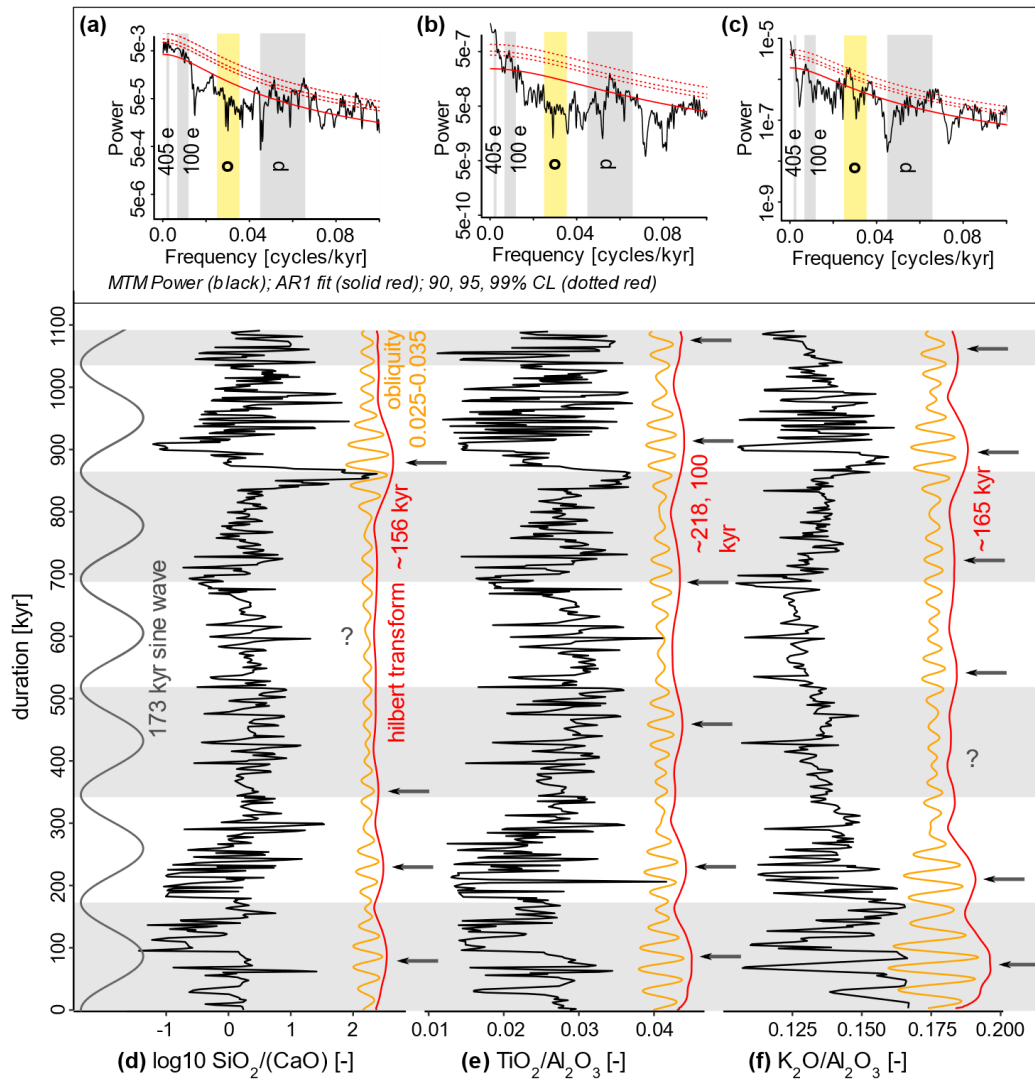

**Fig. X** Obliquity signals in tuned  $\text{SiO}_2/\text{CaO}$  (a, d),  $\text{TiO}_2/\text{Al}_2\text{O}_3$  (b, e) and  $\text{K}_2\text{O}/\text{Al}_2\text{O}_3$  (c, f) records. Panels a-c show the MTM power spectrum (tbw = 2) with the obliquity (o) interval (0.025-0.035) shaded in yellow. Other astronomical parameters (405 kyr eccentricity, 100 kyr eccentricity, precession) are shaded in grey. d-f show the respective proxy record (black), filtered obliquity (orange), and the Hilbert transform of filtered obliquity (red). MTM-inferred periodicities of this Hilbert transform are noted in red. Identified cycles are marked with grey arrows. On the left of panel d, a 173 kyr sine wave is plotted (arbitrary x-axis) and its cycles are marked with white and grey bands.
