# Supplementary material for: Astronomically-paced climate and carbon-cycle feedbacks in the lead-up to the Late Devonian Kellwasser Crisis
Source: Copernicus journal article supplement (doi:10.5194/cp-2023-58), 2023-07-19
Supplement: Supplementary file [file cp-2023-58-RC2-supplement.pdf]

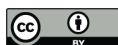

## Astronomically-paced climate and carbon-cycle feedbacks in the lead-up to the Late Devonian Kellwasser Crisis

Nina M.A. Wichern<sup>1</sup>, Or M. Bialik<sup>1</sup>, Theresa Nohl<sup>2</sup>, Lawrence M.E. Percival<sup>3</sup>, R. Thomas Becker<sup>1</sup>, Pim Kaskes<sup>3</sup>, Philippe Claeys<sup>3</sup>, David De Vleeschouwer<sup>1</sup>

<sup>1</sup> Institute of Geology and Palaeontology, University of Münster, Münster, Germany

<sup>2</sup> Department of Palaeontology, Faculty of Earth Sciences, Geography and Astronomy, Universität Wien, Wien, Austria

<sup>3</sup> Analytical, Environmental, and Geochemistry Research Group, Department of Chemistry, Vrije Universiteit Brussel, Brussels, Belgium

Correspondence to: Nina Wichern (nwichern@uni-muenster.de)

### Abstract.

Repeated carbon isotope excursions and widespread organic-rich shale deposition mark the Middle and Late Devonian series. Various explanations such as extensive volcanism and land plant evolution have been given for these perturbations and the general sensitivity of the Devonian to oceanic anoxia, but their repeated nature suggests that astronomical forcing may have controlled their timing. Here, a cyclostratigraphic study of the Kellwasser Crisis at the Frasnian-Famennian stage boundary (ca. 372 Ma) is carried out. The Kellwasser Crisis was one of the most ecologically impactful of the Devonian perturbations and is ranked among the ‘Big Five’ Phanerozoic mass extinctions. The studied site is the Winsenberg Road Cut section in the Rhenish Massif, Germany, which represents a quiet tropical shelf basin setting. Centimetre-scale elemental records, generated by portable X-Ray scanning, allow for testing of the hypothesis that a 2.4 Myr eccentricity node preceded the Upper Kellwasser event. The study’s results are supportive of this hypothesis. We find enhanced chemical weathering ( $K_2O/Al_2O_3$ ) during the period leading up to the Upper Kellwasser, and a peak in distal detrital input ( $SiO_2/CaO$ ) and riverine runoff ( $TiO_2/Al_2O_3$ ) just prior to the start of the Upper Kellwasser. We interpret this pattern as the long-term eccentricity minimum facilitating excessive regolith build-up in the absence of strong seasonal contrasts. The Earth’s system coming out of this node would have rapidly intensified the hydrological cycle, causing these nutrient-rich regoliths to be eroded and washed away to the oceans where they resulted in eutrophication and anoxia. An astronomical control on regional climate is observed beyond this single crisis. Wet-dry cycles were paced by 405-kyr eccentricity, with both the Lower and Upper Kellwasser events taking place during comparatively drier times. A precessional-forced monsoonal climate system prevailed on shorter timescales. Intensification of this monsoonal system following the node may have caused the widespread regolith erosion. We estimate the total duration of the Kellwasser Crisis at ca. 900 kyr, with the individual events lasting for ca. 250 and 100 kyr, respectively. If astronomical control indeed operated via regolith build up in monsoonal climates, land plants may have played an important role. Not by certain evolutionary steps triggering specific perturbations, but by permanently strengthening the climatic response to orbital forcing via soil development – creating soils thick enough to meaningfully respond to orbital forcing – and intensifying the hydrological cycle.

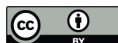

## 1 Introduction

35 The Middle and Late Devonian (ca. 393 – 359 Ma) global carbon cycle experienced frequent perturbations (Buggisch and  
Joachimski, 2006; Cramer and Jarvis, 2020). During these events, organic-rich shales were repeatedly deposited across the  
globe, with positive carbon isotope ( $\delta^{13}\text{C}$ ) excursions in the order of +1 to +4 ‰ (Becker et al., 2020). The organic-rich shale  
deposition occurred synchronously in different continents and oceanic domains, and these deposits are strongly correlated with  
40 Devonian-Carboniferous boundaries (Joachimski et al., 2002; McGhee, 2012; Kaiser et al., 2016). These characteristics  
suggest repetitive and non-regional causal processes.

A potential repetitive and global control mechanism is astronomical forcing. However, organic-rich shale deposition does not  
occur at perfectly regular or predictable intervals, which excludes astronomical forcing as the sole causal mechanism. Current  
discussions of triggering mechanisms focus on tectonic processes (e.g., Averbuch et al., 2005), enhanced volcanic activity  
45 (Racki, 2020; and references therein), sea-level and ocean circulation changes (Wilde and Berry, 1984), and the expansion of  
land plants (Algeo and Scheckler, 1998). Consequently, carbon cycle perturbations may have occurred against a background  
of various interlinked secular and long-term cyclic processes, yet punctuated by astronomical forcing (De Vleeschouwer et al.,  
2017).

To understand the broader pattern and underlying mechanisms of Devonian anoxic events, we must analyse and compare the  
50 conditions that gave rise to individual perturbations. One intriguing case study is the Kellwasser Crisis at the Frasnian-  
Famennian stage boundary (~ 372 Ma, Percival et al., 2018), which had a profound impact on marine biota and is ranked  
among the ‘Big Five’ mass extinctions of the Phanerozoic (Raup and Sepkoski, 1982; Sepkoski, 1996; McGhee et al., 2013).  
The Kellwasser Crisis consists of two distinctive intervals: the Lower (LKW) and Upper (UKW) Kellwasser Events (Schindler,  
1990a; Carmichael et al., 2019). Both events are associated with short-term transgressive episodes (e.g., Becker et al., 2016a;  
55 Mottequin and Poty, 2016). The ultimate cause of the Kellwasser Crisis remains debated: e.g., extensive volcanism (Racki,  
1999; Ma et al., 2016; Racki et al., 2018; Racki, 2020; Kabanov et al., 2023), climatic cooling (Copper, 1986; Joachimski and  
Buggisch, 1993, 2002; Song et al., 2017; Huang et al., 2018; Pier et al., 2021), and land-plant induced eutrophication (Algeo  
et al., 1995; Algeo and Scheckler, 1998; De Vleeschouwer et al., 2017). Several of the proposed mechanism are not mutually  
exclusive and combinations of causes have often been suggested.

60 Astronomical forcing could have controlled several of the factors described above, and an astronomical influence on climate  
during the Kellwasser interval has already been proposed (De Vleeschouwer et al., 2017; Whalen et al., 2017; Da Silva et al.,  
2020; Lu et al., 2021; Ma et al., 2022). Yet, the different astrochronologies are not all in agreement (De Vleeschouwer et al.,  
2017; Ma et al., 2022), with significant implications for the controlling parameters of the Kellwasser Crisis. De Vleeschouwer  
et al. (2017) proposed that a particular sequence of orbital changes led to the Late Devonian climate crossing a tipping point  
65 into widespread anoxic conditions in the oceans (Fig. 1): Prior to the UKW, a 2.4 Myr eccentricity minimum (or “node”)  
created relatively stable climate conditions for several tens of thousands of years. During an eccentricity minimum, the Earth’s



orbit is close to circular, and the modulation of precession is dampened. Large seasonal contrasts are thus suppressed. In this stable climate, thick regoliths could form on the continents, promoted by newly-developed coastal forests. A subsequent rapid increase in eccentricity led to stark precessional contrasts towards the onset of the UKW. The resulting intensified monsoonal climate during precession maxima triggered the release of nutrients from the continents into the oceans as the regolith was more readily eroded and washed away. This sudden nutrient input led to eutrophication, anoxia, and black shale deposition (Fig. 1). The hydrological cycle weakens again during the next precession minimum. However, phosphorus recycling from the sediments is promoted under anoxic conditions (Van Cappellen and Ingall, 1996; Smart et al., 2022). Once anoxia has been established during a precession maximum, this mechanism may result in sustained anoxia even in the absence of consistent high nutrient input. Subsequent work by other authors has established cyclostratigraphic interpretations that support the ‘eccentricity minimum hypothesis’ (Da Silva et al., 2020; Lu et al., 2021). Additional lines of evidence such as micrometeorite dust flux (Schmitz et al., 2019) and osmium isotopes (Percival et al., 2019) provided independent evidence to eccentricity state and enhanced nutrient fluxes during this interval, respectively. This model has been challenged by Ma et al. (2022), who proposed that a combination of an eccentricity maximum and an obliquity maximum resulted in enhanced seasonal contrast and strengthened monsoons as this combination results in maximum insolation.

To address the astrochronology debate and to improve our understanding of environmental changes under different overarching climate states, we set out to investigate the astronomical pacing of the Kellwasser. In this study, we conduct a cm-scale resolution cyclostratigraphic study of the Kellwasser Crisis in the Rhenish Massif of Germany.

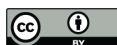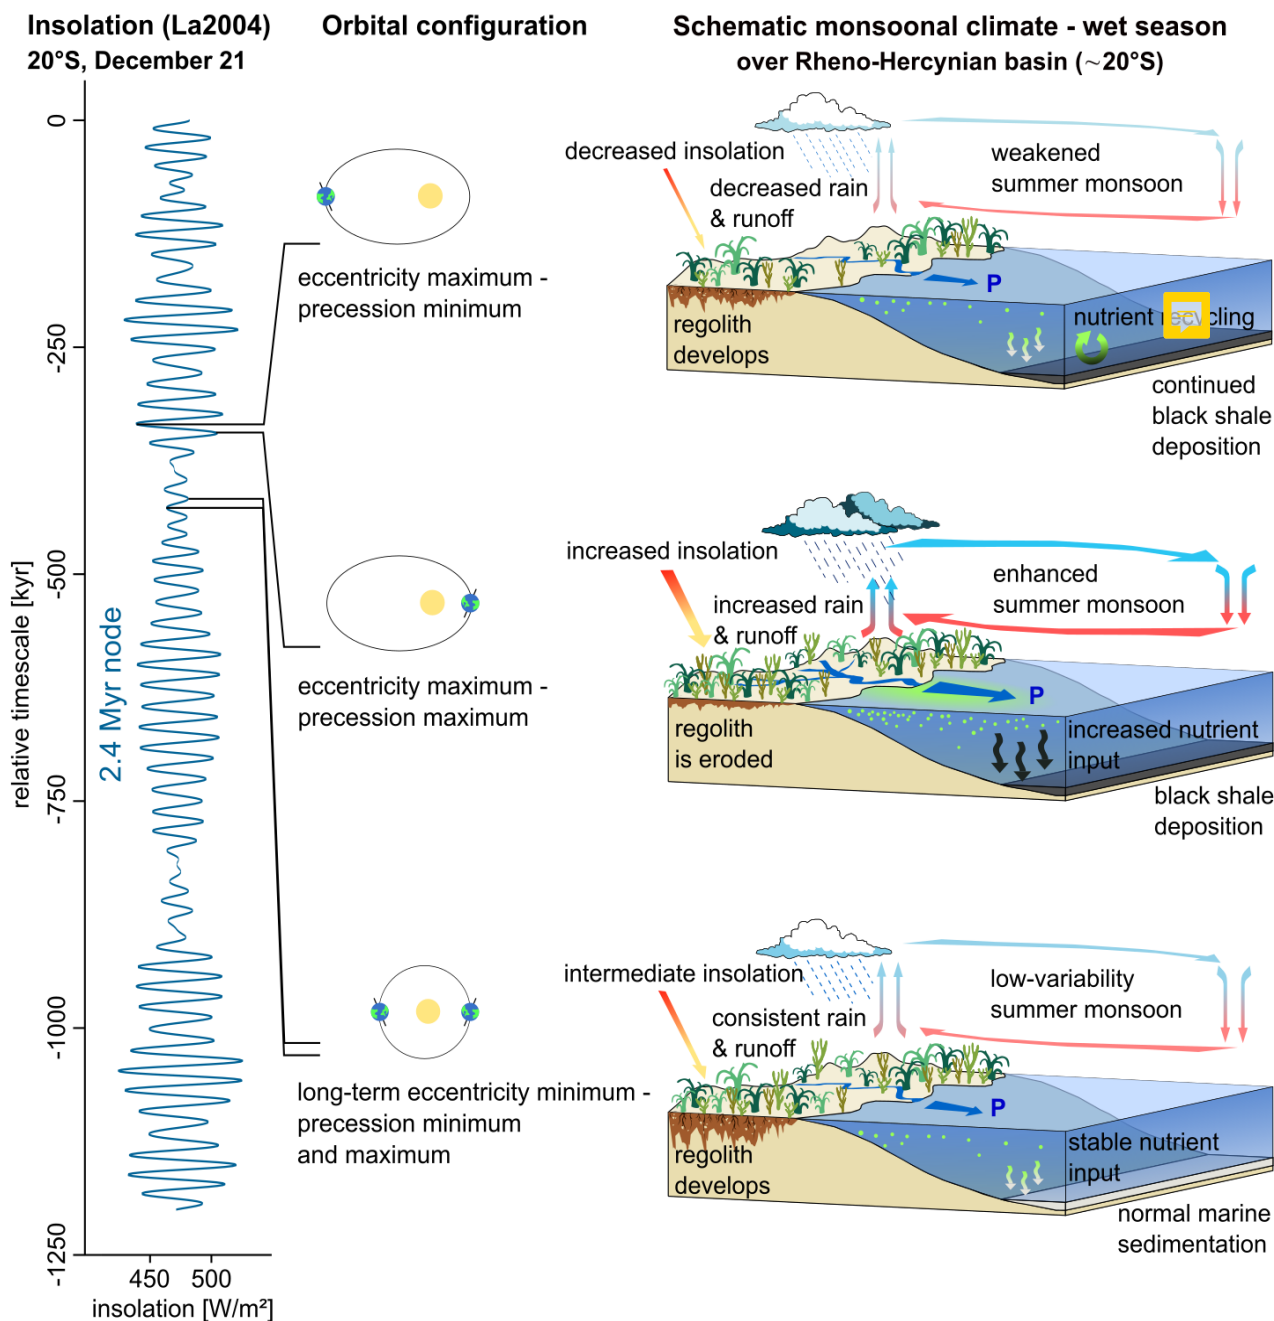

Figure 1. Schematic illustration of the eccentricity minimum hypothesis, after De Vleeschouwer et al. (2017). During the eccentricity minimum within a 2.4 Myr node, seasonal contrasts are avoided, leading to regolith build-up on the continents (bottom panel). This regolith and the nutrients it contains are subsequently eroded during the first intense precession maximum that occurs as Earth's orbital configuration comes out of the node. This leads to eutrophication (middle panel). The hydrological cycle weakens again during the following precession minimum, but phosphorus recycling under the established anoxic conditions is able to sustain anoxia and black shale deposition (top panel).



## 85 2 Geological setting and lithology

The Winsenberg roadcut is exposed along the Bredelarer Strasse between the village of Diemelsee-Adorf and the Christiane Mine (Grube Christiane), at 51°22'17.1"N, 8°47'51.0"E (Fig. 2a, b), and has been previously studied by various authors. The sediments were deposited in an inter-tropical outer shelf basinal setting, several hundreds of kilometres off the coast of southern Euramerica (Fig. 2c, d; (Meischner, 1971; Gereke, 2007; van Hulst, 2012). The exposed rocks belong to the macroscopically  
90 banded Winsenberg Formation (also called 'Adorf Bänderschiefer', Becker et al., 2016b), which consists of grey-brown marls, micritic/microsparitic limestones that are sometimes dolomitized (Gereke, 2007), and silty or pyritic shales, with reddish-brown weathered surfaces (Fig. A1c, d). The restricted fauna consists of benthic and planktonic ostracods, tentaculitoids, deeper-water conodonts (*Palmatolepis* biofacies), trace fossils, and rare ammonoids. These represent pelagic assemblages that are typical for offshore deposition below the euphotic zone and with variable seafloor oxygenation (Piecha, 1993; Gereke,  
95 2007; Becker et al., 2016b). Most of the carbonate in the Winsenberg section is likely derived from shallower, more proximal settings (see thin sections in Piecha, 1993; Gereke, 2007), such as the drowned Brilon Reef and adjacent volcanic seamounts to the north of Winsenberg (Stritzke, 1990; Becker, 1993; Pas et al., 2013; Hartenfels et al., 2016). It should be noted that all reefs in the eastern Rhenish Massif had drowned prior to the Kellwasser Crisis (e.g., Becker et al., 2016a).

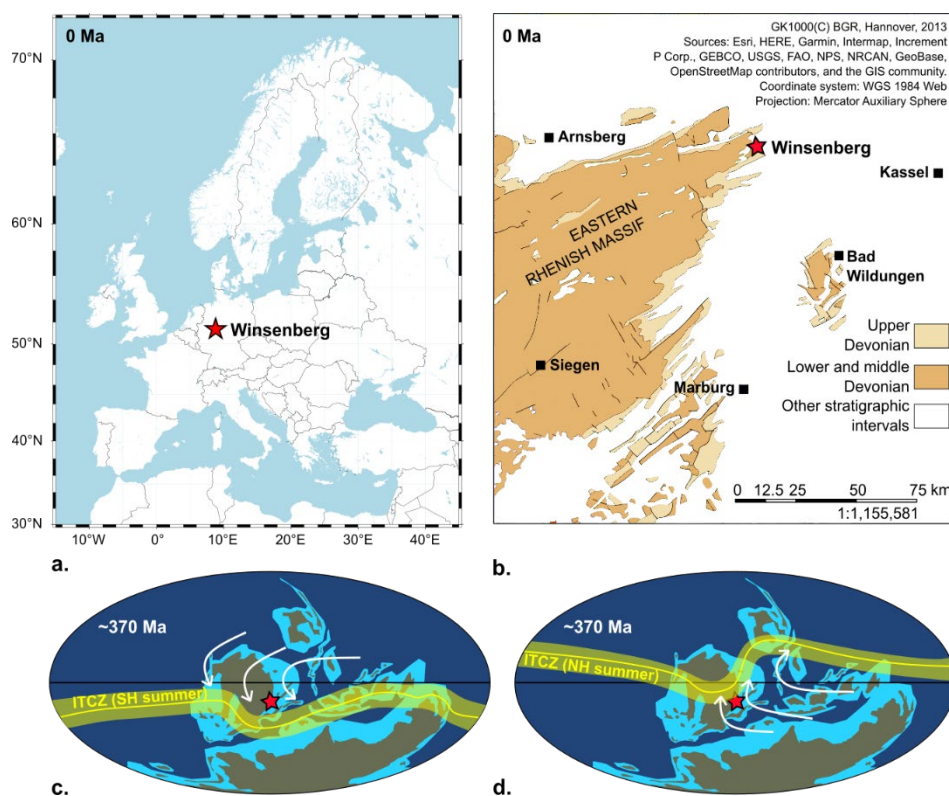

**Figure 2.** a) Modern-day location of the Winsenberg section within Germany. b) Modern-day location of the Winsenberg section within the Devonian outcrops of the Rhenish Massif. c) Late Devonian location of the Winsenberg section in southeast Laurentia. Included is the approximate position of the Northern Hemisphere (NH) summer Inter-Tropical Convergence Zone (ITCZ) in yellow. Associated prevailing trade winds are drawn as white arrows. d) The same as c) for the Southern Hemisphere (SH) summer. The Late Devonian map is inspired by Blakey (2016). ITCZ positions are based on De Vleeschouwer et al. (2014). The geological map is based on the GK1000 map from the German Bundesanstalt für Geowissenschaften und Rohstoffe (BGR).



The twelve-meter-long studied section stretches spans the strata that record the LKW and UKW events (Fig. 3a). Just below  
100 the LKW horizon, a 72 cm thick limestone bed with cm-scale internal variations of carbonate content is present, termed the  
Usseln Limestone (Gereke, 2007) (Fig. A1a). This unit was logged and sampled for carbonate  $\delta^{13}\text{C}$ , but not further analysed  
in this study. The LKW event is expressed as a ca. 170 cm thick interval of dark shales and limestones (0.8-2.2 wt% TOC, Fig.  
A1b), the latter of which increase in abundance towards the top. This black shale and limestone expression is typical for  
German Kellwasser sections (Schindler 1990a; 1990b; Riquier et al. 2006; Carmichael et al. 2019). Benthic ostracod bloom  
105 beds are found near the top of the LKW (Becker et al., 2016b). Lower Kellwasser black shale deposition is followed by a ca.  
six metres thick succession of Winsenberg Formation marls, limestones and shales. This lithological shift indicates a tempo  
return to more oxygenated conditions before the onset of the UKW, although some of the thin shales are dark in colour and  
contain up to 1.5 wt% TOC. The UKW horizon itself comprises a ca. 70 cm thick interval of dark shales and micritic limestones  
(0.4-1.2 wt% TOC, Fig. A1e). The UKW black shale is followed by five thin, regionally traceable black shales (ca. 0.8 wt%  
110 TOC), termed fa-bs 1 to 5 ("Famennian black shale 1 to 5") (Gereke, 2007; Becker et al., 2016b). The lowest of these, fa-bs-  
1, separates two distinctive, weathered marker limestones without bioclasts, but with another benthic ostracod bloom and large  
pyrite concretions that were probably filling burrows (Gereke, 2007; Becker et al., 2016b). The remaining post-UKW black  
shales (fa-bs 2 to 5) are interbedded with marls and nodular limestones (Fig. 3a, Fig. A1f). An expanded log with bed  
numbering and sampling positions can be found in Fig. A2. The lithology of the Winsenberg section was briefly described by  
115 Franke (1991, "Aar valley road section"), Franke et al. (1996, "Aar valley road section"), Becker (1984, "Road section NW  
Winsenberg"), Schindler and Königshof (1997, "SW Grube Christiane"), Gereke and Schindler (2012, "Grube Christiane"),  
and Becker et al. (2016, "Winsenberg Road Cut"), and studied in detail by Piecha (1993, "Profile AD 1") and Gereke (2007,  
"Grube Christiane"), including clastic sedimentology and carbonate microfacies. Carbon isotopes were studied by Joachimski  
(1997, "Grube Christiane") describing the two characteristic positive excursions at the LKW and UKW horizons. The section's  
120 burial history was determined by Königshof (1992) on the basis of conodont alteration indices. These indices suggested burial  
temperatures of +300°C, highlighting a strong potential for late burial diagenetic alteration. Conodont biostratigraphy was  
carried out by Königshof (1992) and Gereke (2007), with zonal re-assignments and additional data in Becker et al. (2016b).  
This confirmed the position of the Frasnian-Famennian boundary at the top of the UKW horizon (Fig. 3a). There is no absolute  
age control available for this section; however, in the Steinbruch Schmidt section ca. 70 km southeast of Winsenberg, a  
125 bentonite in between the LKW and UKW horizons was recently dated at  $372.36 \pm 0.053$  Ma using U-Pb zircon dating (Percival  
et al., 2018). While this date precisely pinpoints the age of the Kellwasser Crisis, the only available constraints on its duration  
are those based on recent stratigraphic studies (De Vleeschouwer et al., 2017; Da Silva et al., 2020; Ma et al., 2022).

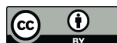

130

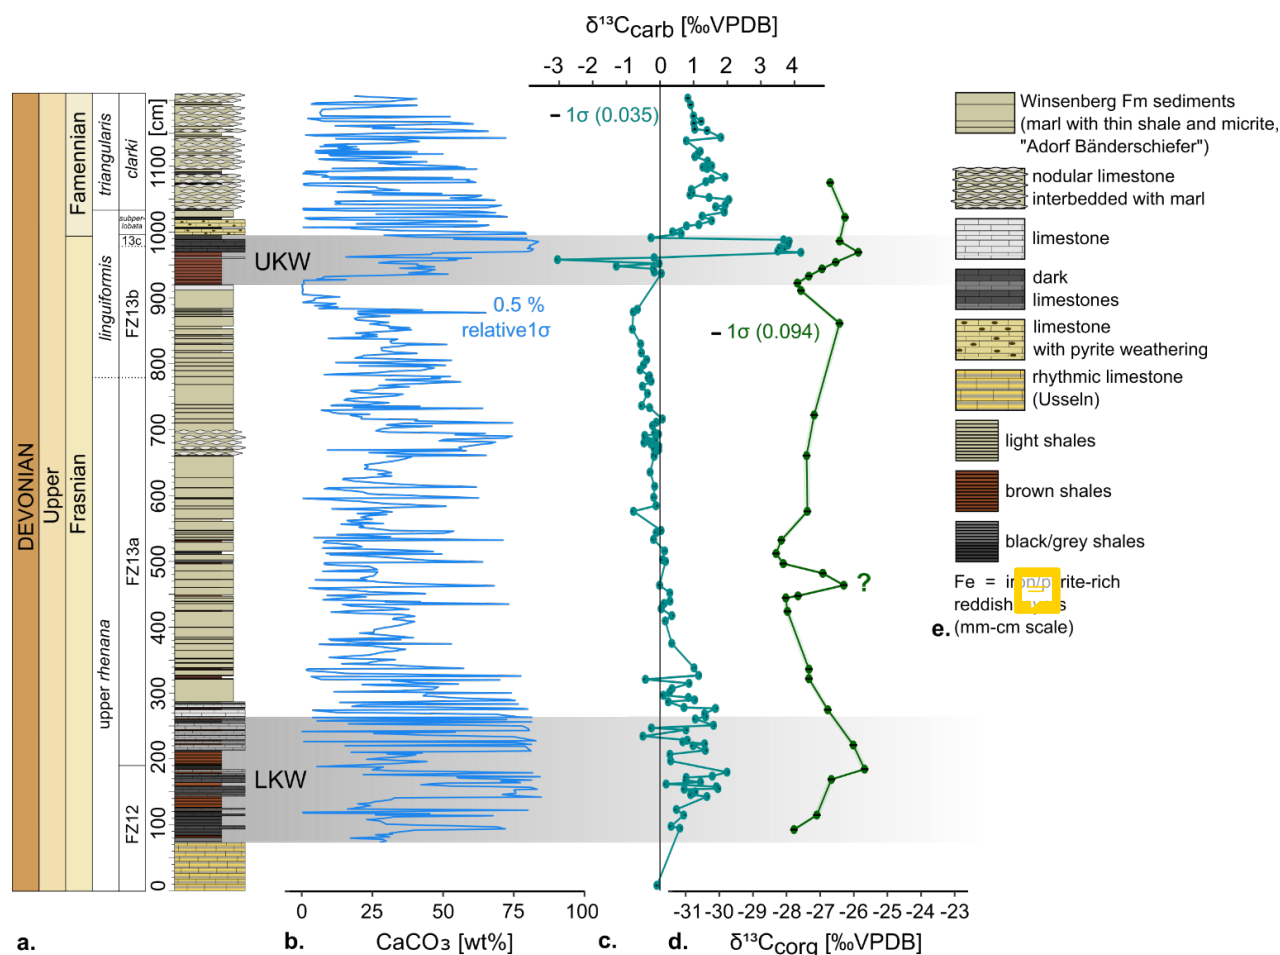

**Figure 3.** a) Lithologic column (this study) and conodont biostratigraphy by Königshof (1992) and Gereke (2007), with minor additions by Becker (2016b). b)  $\text{CaCO}_3$  content as quantified from pXRF Ca data. c) Carbonate  $\delta^{13}\text{C}$  data showing the two positive excursions within the LKW and UKW intervals. d) Organic carbon  $\delta^{13}\text{C}$  data showing a similar trend to the carbonate  $\delta^{13}\text{C}$  record. The peak around 460 cm does not correspond to any known global or regional excursion. e) Legend for the lithological column.

### 3. Methods

#### 3.1 Sampling

We logged 12 m of the outcrop, from the limestone that underlies the LKW to 2 meter above the top of the UKW horizon (Fig. 3a). The weathered outer surface of the outcrop was removed, and hand samples were taken every 1-3 cm ( $N = 556$ ). Recent dating efforts have estimated the duration of the LKW-UKW interval to have been 800-1600 kyr (De Vleeschouwer et al., 2017; Percival et al., 2018; Da Silva et al., 2020; Lu et al., 2021; Ma et al., 2022). Hence, even for the longest duration estimate, our sample spacing still ensures  $\sim 5$  samples per  $\sim 19$ -kyr precession cycle.



### 3.2 Carbonate and organic carbon $\delta^{13}\text{C}$

140 The  $\delta^{13}\text{C}$  composition of 144 carbonate-rich samples was analysed ( $\delta^{13}\text{C}_{\text{carbonate}}$ ). Measurements on powdered samples weighing 120-150  $\mu\text{g}$  were carried out on a ThermoScientific Delta V Plus mass spectrometer at the University of Münster. An in-house carbonate standard, Karonat-1 ( $\delta^{13}\text{C} = 1.46\text{‰}$ ,  $\delta^{18}\text{O} = -1.19\text{‰}$ ), was used for calibration. The external standard NBS-19 ( $\delta^{13}\text{C} = 1.95\text{‰}$ ,  $\delta^{18}\text{O} = -2.20\text{‰}$ ) was used for long-term performance monitoring. All  $\delta^{13}\text{C}$  values are reported relative to VPDB. The in-house standard Karonat-1 has a  $\delta^{13}\text{C}$  standard deviation ( $\sigma$ ) of 0.04 $\text{‰}$  (N=54). The external standard NBS-19 has a  $\sigma$  of 0.02 $\text{‰}$  (N=10), and a mean offset of +0.04 $\text{‰}$  relative to the accepted value. The samples have a  $\delta^{13}\text{C}$  standard deviation of 0.04 $\text{‰}$  based on duplicate measurements of 15 samples.

In addition, a lower-resolution (N = 48) organic-matter carbon isotope series ( $\delta^{13}\text{C}_{\text{org}}$ ) was constructed at the Analytical, Environmental and Geo-Chemistry Research Group (AMGC) of the Vrije Universiteit Brussel (Belgium). The procedure in Liu et al. (2021) was followed. The samples were decarbonated with 10% HCl in two steps, rinsed with milliQ water, and dried in an oven at 50°C. Total organic carbon (TOC) contents and  $\delta^{13}\text{C}_{\text{org}}$  compositions were determined on a Euro EA Elemental Analyzer (CHNS) - Euro Vector HT-PyrOH combustion system coupled to a Nu-Instruments Horizon 2 isotope ratio mass spectrometer. The results were calibrated using two international standards, IAEA-C6 (sucrose:  $\delta^{13}\text{C} = -10.45\text{‰}$ ) and IA-R068 (soy protein:  $\delta^{13}\text{C} = -25.22\text{‰}$ ), together with reference material IVA33802151, which is calibrated against these international standards (organic-rich sediment:  $\delta^{13}\text{C} = -28.85\text{‰}$ ). This calibration was verified with a further reference material, IVA33802153 (organic-rich soil:  $\delta^{13}\text{C} = -22.88\text{‰}$ ). All  $\delta^{13}\text{C}$  values are reported relative to VPDB. Standard deviations for all standards were as follows: IAEA-C6 (sucrose) 0.095 $\text{‰}$ , IA-R068 (soy protein) 0.065 $\text{‰}$ , IVA33802151 (organic-rich sediment) 0.042 $\text{‰}$ , IVA33802153 (organic-rich soil) 0.201 $\text{‰}$ . The samples have a  $\delta^{13}\text{C}$  standard deviation of 0.039 $\text{‰}$  based on duplicate measurements of 5 samples.

### 3.3 Portable XRF

#### 160 3.3.1. portable XRF analyses on powdered material

All samples were analysed using portable X-ray fluorescence (pXRF) in a laboratory environment. From each hand sample, a powder was drilled using a hand-held Dremel drill with a diamond drill bit. The XRF analysis of a homogenized powder instead of a whole-rock surface minimizes errors due to surface irregularities and compositional heterogeneities. Moreover, drilling by hand allows for avoiding weathered surfaces and secondary veins, as long as these are large enough to be visible. The powders were sieved through a 180  $\mu\text{m}$  sieve to remove any coarse debris prior to XRF analysis. The 90<sup>th</sup> percentile (D90) of all analysed samples was  $\leq 50 \mu\text{m}$ . This grain size adheres to the guidelines provided in Claisse and Samson (1961) and Quye-Sawyer et al. (2015) (see appendix B1). The powders were loaded into plastic vials covered with Chemplex Prolene thin film. XRF measurements were carried out on a Bruker S1 Titan 800 handheld XRF instrument with a graphene window and 8 mm collimator at the University of Münster. Measurement conditions were as follows: 40 keV, 20  $\mu\text{A}$ , 75 s, and no filters.





170 The spectra were deconvoluted within the Bruker Artrax software. Reproducibility after repackaging the powders was <0.5 wt% for all major elements based on 3 duplicate measurements of 5 samples.

### 3.3.2. Calibration and quantification of element contents

To calibrate the data, a dataset of 10 sedimentary rock standards was analysed following the same procedure. Their composition and source can be found in the supplementary materials. This dataset was supplemented with 11 mixtures of quartz (Fluka  
175 Chemika 00653) and calcium carbonate (Merck A965776). The result is a linear calibration for all the elements used here that can be used semi-quantitatively (Fig. C1).

The calibrated pXRF results were validated through comparison with acid digestion data. CaCO<sub>3</sub> data obtained from the calibrated pXRF measurements was compared to CaCO<sub>3</sub> estimates from the  $\delta^{13}\text{C}_{\text{org}}$  acid digestion of the same samples. Both  
180 datasets show the same trends, albeit with a ~8 wt% offset. The offset likely originates from components aside from CaCO<sub>3</sub> being digested as well (Fig. C2). Nevertheless, the slope is close to unity (1.072; Fig.C2). Tracking relative changes using spectral analysis is therefore expected to give reliable results.

### 3.4 Selection and interpretation of elemental ratio proxies

 We selected the following ratios for cyclostratigraphic and palaeoclimatic analysis: SiO<sub>2</sub>/CaO, TiO<sub>2</sub>/Al<sub>2</sub>O<sub>3</sub>, and K<sub>2</sub>O/Al<sub>2</sub>O<sub>3</sub>. Aluminium is on the light end of elements that can still be reliably detected with pXRF. Comparison with SiO<sub>2</sub> and TiO<sub>2</sub>  
185 suggests that it tracks a similar detrital signal (Fig. C3). SiO<sub>2</sub>/CaO is interpreted to mirror the total detrital (distal-terrestrial) input over the total carbonaceous (proximal-marine) input. Silica is interpreted to  chiefly detrital as conodont sample residues and thin sections do not contain notable amounts of biogenic skeletal silica such as hexactinellid spicules or radiolaria (except Bed 05 of Gereke, 2007, see his pl. 1, Fig. 4; around 220 cm in this study's profile). The local carbonate is fine-grained and mostly recrystallized (Piecha, 1993). It is interpreted as detritus derived from the drowned Brilon Reef in the north (see  
190 the facies model of Eder et al., 1977), admixed with small amounts of small shells (ostracods, tentaculitoids) and possibly with planktonic calcimicrobes (*Calcitarcha* sensu Versteegh et al., 2009) that, if originally present, were lost by diagenesis. The SiO<sub>2</sub>/CaO ratio represents the largest variability within the major oxides of the dataset (assessed using Non-Metric Multidimensional Scaling or NMDS, Fig. C4). As it represents a major component of the purported palaeoclimatic signal, spectral analysis and tuning was focussed on this record. A log<sub>10</sub> transformation was carried out on the SiO<sub>2</sub>/CaO record prior  
195 to this analysis, as the log-transformed SiO<sub>2</sub>/CaO record carries a more stationary signal. To ensure CaO does not import a diagenetic signal in the analysis, the ratio of SiO<sub>2</sub>/CaO and the ratio of the diagenetically stable TiO<sub>2</sub>/Al<sub>2</sub>O<sub>3</sub> (see below) were compared. Though the amplitude differs, the same signal curve is obtained, suggesting a predominantly primary signal (Fig. C5).

TiO<sub>2</sub>/Al<sub>2</sub>O<sub>3</sub> is interpreted as a riverine input signal. Ti is associated with the coarser mineral fraction and Al with the finer clay  
200 fraction, and therefore most Ti is expected to reach the basin through riverine transport (Calvert and Pedersen, 2007), where it was further distributed by long-distance currents. Since the Winsenberg Road Cut was far from the coast and the influence of



local drainage systems, potential coastal differences of siliciclastic provenance were likely homogenized by intra-basinal transport. Piecha (1993) found no evidence for aeolian silt transport. Both Ti and Al are considered diagenetically stable (Wintsch and Kvale, 1994; Young and Nesbitt, 1998). Their changing ratios are therefore assumed to reflect a primary signal. Furthermore, by using a ratio of detrital elements such as  $\text{TiO}_2/\text{Al}_2\text{O}_3$ , we avoid tracking distortions that arose from early differential diagenesis (Munnecke and Samtleben, 1996). Detrital elements bound to clay minerals are not mobilised during early diagenetic carbonate dissolution and reprecipitation (Nohl et al., 2021). By using a ratio, changes due to enrichment or dilution as a result of this carbonate dissolution and reprecipitation are accounted for (Westphal et al., 2010; Nohl et al., 2021). This is especially important in cyclostratigraphic studies, as differential diagenesis can produce limestone-marl alternations that can look similar to astronomically forced cyclic successions (Westphal, 2006; Nohl et al., 2020). The different  $\text{TiO}_2/\text{Al}_2\text{O}_3$  ratios in limestones, marls, and clays in the studied section point to a primary signal that can be attributed to environmental changes, regardless of subsequent differential diagenesis (Fig. C6, see also Nohl et al., 2021).  $\text{K}_2\text{O}/\text{Al}_2\text{O}_3$  is interpreted as a chemical weathering signal. Both K and Al are associated with clays, but K is leached more readily than Al and lost from the sediment, so a lower  $\text{K}_2\text{O}/\text{Al}_2\text{O}_3$  is assumed to reflect more intense chemical weathering conditions (Nesbitt et al., 1980; Clift et al., 2014; Hu et al., 2016). K is much less diagenetically stable than Ti and Al, as its content can increase in shales with depth due to diagenetic illitization of smectite (Wintsch and Kvale, 1994). However, its similarity to the other detrital elements suggests that this process is not significant in this section (Fig. C3).

### 3.5 X-ray diffraction

Chemical weathering leads to the formation of secondary clay minerals from primary minerals. To determine whether changes in the  $\text{K}_2\text{O}/\text{Al}_2\text{O}_3$  chemical weathering proxy correlate to changes in clay mineral content, the mineralogy of four samples was analysed using qualitative X-ray diffraction (XRD). The powdered sample was smeared onto a glass sample holder with a rough texture. The samples were then measured on a Philips X'Pert Modular Powder Diffractometer at the University of Münster, Germany. This instrument is equipped with a Cu anode (1.5405 Å) and was operated with the following settings: 45 kV voltage, 40 mA current,  $0.02^\circ\theta$  step size, 1 s per measurement step,  $3\text{-}50^\circ 2\theta$  measuring range, 30 runs per sample, and no sample rotation. The data were analysed in the X'Pert proprietary software and in R using the powdR package (Butler and Hillier, 2020). This methodology permits only the general identification of clay types and their relative abundances.

### 3.6 Spectral analysis

Spectral analysis and the subsequent construction of a floating astronomical timescale was carried out on the pXRF-generated  $\log_{10}(\text{SiO}_2/\text{CaO})$  record to discern potential periodicities that can be linked to Milanković cycles. Significant periodicities were identified using the Multi-Taper Method (MTM, Thomson, 1982) with three slepian tapers. Changes in these periodicities with depth, suggesting sedimentation rate changes, were inferred from evolutive harmonic analysis (EHA) and continuous wavelet spectra (CWT). The significant periodicities were then bandpass filtered using a gaussian filter. Testing of the inferred amplitude modulation patterns was carried out using TimeOpt. With the exception of the wavelet analysis, for which the



“biwavelet” package was used (Gouhier et al., 2021), all analyses were carried out using the “astrochron” package for R  
235 (Meyers, 2014). Outliers were removed from the  $\text{TiO}_2/\text{Al}_2\text{O}_3$  and  $\text{K}_2\text{O}/\text{Al}_2\text{O}_3$  records using astrochron’s boxplot-algorithm-  
based trim() function, as outliers can impede spectral analysis (carried out in the time domain for these records). This was not  
necessary for the  $\text{SiO}_2/\text{CaO}$  record due to the  $\log_{10}$  transformation. All records were linearly detrended.

## 4 Results and discussion

### 4.1 Identification of carbon isotope excursions

240 Both  $\delta^{13}\text{C}_{\text{carb}}$  and  $\delta^{13}\text{C}_{\text{org}}$  records show positive excursions near the LKW and the UKW horizons, as is typical for Euramerican  
Kellwasser sections (Joachimski et al., 2002; Carmichael et al., 2019, and references therein). The magnitudes of these  
excursions are +2‰  $\delta^{13}\text{C}_{\text{org}}$  for both LKW and UKW, and +2‰ and +4‰  $\delta^{13}\text{C}_{\text{carb}}$  for the LKW and UKW, respectively (Fig.  
3c, d). These values broadly match other observed positive excursions in both  $\delta^{13}\text{C}_{\text{carb}}$  and  $\delta^{13}\text{C}_{\text{org}}$ , which range between +1 and  
+4‰ (Joachimski and Buggisch, 1993; Joachimski et al., 2001; Devleeschouwer et al., 2002; Bond et al., 2004; Hartkopf-  
245 Fröder et al., 2007; Kaiho et al., 2013; Ma et al., 2016; De Vleeschouwer et al., 2017; Whalen et al., 2017; Song et al., 2017).  
Both carbon isotope excursions extend well above the top of the LKW and UKW horizons, as often observed (Joachimski  
and Buggisch, 1993; Song et al., 2017; Da Silva et al., 2020). After the rapid carbon cycle perturbation that caused the LKW  
and UKW excursions, the return to background conditions was gradual.

The sharp peak of +4‰  $\delta^{13}\text{C}_{\text{carb}}$  within the UKW (at. ca. 9.65 m profile height) corresponds to a lithology change from shale  
250 to limestone (Fig. 3c). These very high values could be related to export of shallow-water carbonates to the site, which often  
have a heavier  $\delta^{13}\text{C}_{\text{carb}}$  value than deep-water (local) carbonates (Swart, 2008). However, the carbonate in the two  
corresponding limestone beds is purely micritic and there are almost no bioclasts in the finely laminated limestone (Piecha,  
1993, pl. 21, Fig. 4; Gereke, 2007, pl. 1, Figs. 1-2), so this interpretation cannot be proven by the presence of shallow shelf  
faunal assemblages. There is no evidence for scouring at the base, or grading within the beds either. An alternative explanation  
255 is that this sharp shift represents diagenetic alteration, where the shift in  $\delta^{13}\text{C}_{\text{carb}}$  values is exacerbated by early diagenetic  
movement of carbonate. There is a  $\delta^{13}\text{C}_{\text{org}}$  peak in-between the LKW and UKW horizons around 4.6 m, based on two datapoints  
(Fig. 3d). This ca. +2‰ excursion does not correspond to lithology changes, and it is unclear whether this peak represents a  
diagenetic feature or a real environmental signal. Minor/short intra-Kellwasser positive excursions have previously been  
observed in selected sections (e.g., Vogelsberg, Thuringia, and Coumiac, southern France; Joachimski and Buggisch, 1993),  
260 but may represent local features. Considering the high burial temperatures the deposits experienced (Königshof, 1992), oxygen  
isotopes likely underwent diagenetic alteration and were therefore not used in this study. Carbon isotopes are generally more  
stable than oxygen isotopes and are therefore expected to have remained relatively unaltered (Veizer et al., 1999). This is  
supported by the lack of correlation between bulk  $\text{CaCO}_3$  oxygen and carbon isotopes ( $R^2=0.002$ , see carbonate isotope data  
under Data Availability). Some alteration of the organic carbon isotopes cannot be excluded, however (see also Joachimski,



265 1997). The studied rocks crossed the oil window (Königshof, 1992), which poses limitations to the  $\delta^{13}\text{C}_{\text{org}}$  paleoenvironmental interpretation and long-range correlation potential.

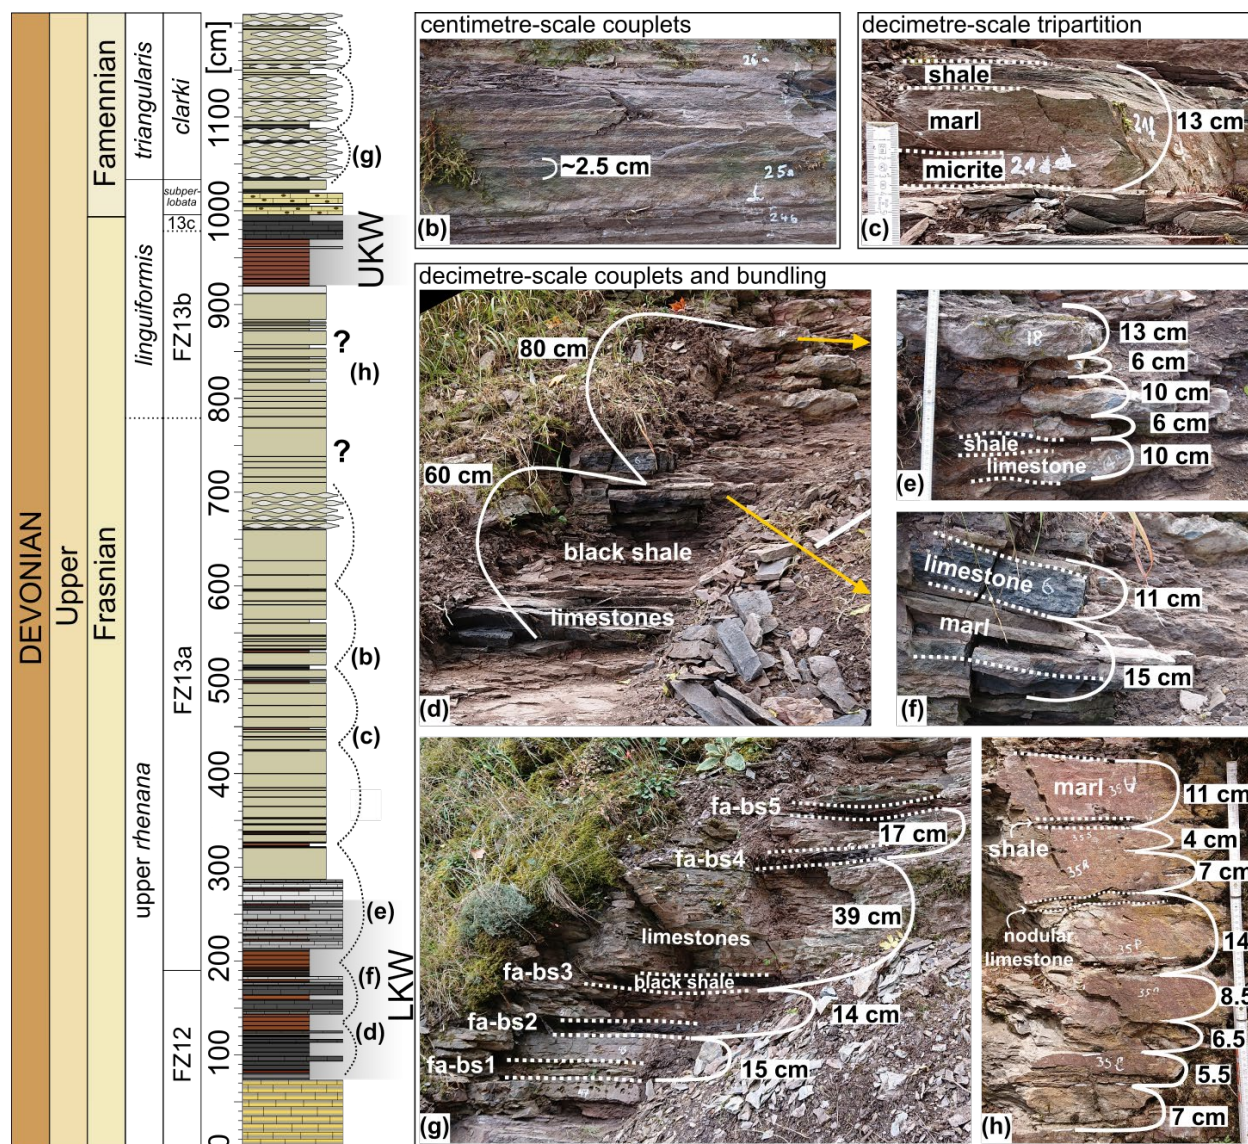

Figure 4. Rhythmic lithologies observed in the Winsenberg section. a) Log with locations of photos b-h marked. Visual interpretations of bundles are drawn with dotted lines. b) Centimetre-scale light-dark carbonate-rich and shale-rich couplets. Inter-Kellwasser interval, around 520 cm. c) Example of a well-expressed decimetre-scale tripartition of the Winsenberg Fm, consisting of a thin unit of micrite, a thick unit of marl, and a thin unit of shale. Inter-Kellwasser interval, around 440 cm. d) Sub-metre-scale bundling of limestone-rich and shale-rich intervals. Lower Kellwasser, around 70 cm. e) Detail of photo c showing decimetre-scale couplets of thick limestones and thin shales. Lower Kellwasser, around 220 cm. f) Detail of photo c showing decimetre-scale couplets of thick limestones and thin marls. Lower Kellwasser, around 150 cm. g) Sub-metre scale bundling of black shale-limestone couplets. Above Upper Kellwasser, around 1000 cm. These post-Kellwasser five black shales occur in several sections in the Rhenish Massif and are labelled fa-bs 1-5 (Gereke, 2007). h) Examples of less well-expressed Winsenberg Fm rocks. Couples of thick marl and thin shale, with intermittent thin nodular limestone beds. Below the Upper Kellwasser, around 820 cm.



## 4.2 Cyclostratigraphic interpretation and tuning

### 4.2.1 Lithological variations and rhythmicity within the section

Hierarchical rhythmicity is observed in the lithology, including bundling that is typical of eccentricity-modulated precession. On the smallest scale, cm-thick light-dark alternations are visible within individual beds (Fig. 4b). Rhythmic cm-scale alternations are also present within the Usseln Limestone below the LKW. As these are likely millennial-scale in nature and not sampled at an adequate resolution, they will not be discussed further.

On a decimetre-scale there are the tripartitions of the Winsenberg Formation/Adorf Bänderschiefer. In their well-developed facies, these consist of thin micritic limestone, thick marl, and a thin shale, sometimes dark in colour (Fig. 3c). Based on this thickness distribution, we interpret these lithological cycles as dilution cycles, whereby a more or less steady carbonate flux is diluted by a more variable (and possibly climate-driven) clay flux. The lithologic tripartitions are easiest identified by their dark shale component (Fig. 3a). These dark shales form bundles of 2-3 (not 5-6). If the triplets represent precession cycles, then they are formed via a threshold response similar to Cenozoic sapropels in the Mediterranean (e.g., Lourens et al., 1992). In their less well-developed facies, the Winsenberg rocks consist mostly of marl, with no clear, or very thin, limestone and shale. In the log, these intervals lack thin dark shales and alternate with well-expressed intervals (Fig. 4a). The interval below the UKW is poorly expressed in its entirety (Fig. 3a, ca. 650-900 cm). The shales here are thin, and the limestone is often missing save for some thin nodular intervals, making it more of a bipartition between marl and shale (Fig. 4h). Above the UKW, the Winsenberg Formation consists of cm-scale nodular limestone and marl alternations, instead of the tripartition (Fig. A1f), but this may be a diagenetic feature. These limestones and marls are punctuated by five thin black shales (fa-bs 1-5), in bundles of 3 and 2, respectively (Fig. 3g), similar to the dark shales in between the LKW and UKW. These five shales are regionally traceable, which lends credence to an allogenic forcing for their deposition.

In the Kellwasser intervals, bipartitions of dark shale and limestone are observed. These are further grouped into bundles of 3-10 couplets (Fig. 3d-f). Ten couplets only occur together in the uppermost part of the LKW here, and there might be a minor repetition here due to a small fault (Gereke, 2007). The bundles are separated by homogenous shaly intervals that lack limestones. This grouping of bundles is best observed in the thicker LKW, as the UKW only consists of one such grouping (Fig. 4a). Similar to the shale bundles, these limestone bundles may represent precession cycles controlled by a threshold process.

The bundles of shales and limestones, separated by a more homogenous interval consisting of either marls or shales, may represent 100-kyr eccentricity that acts as a modulator on precession (Fig. 4a, d, g). These cycles are ca. 40-80 cm thick. The lithological succession is assumed to have preserved a primary environmental signal supported by the corresponding geochemical record of diagenetically stable  $\text{TiO}_2/\text{Al}_2\text{O}_3$  ratios (Fig. C5). The study interval lies above the last turbiditic Flintz limestones, thick-bedded micrites (“Adorf Limestone” with goniatites, Becker et al., 2016b), and below an assumed tuffite (Piecha, 1993). These would represent stochastic depositional events interrupting the rhythmic sedimentation.

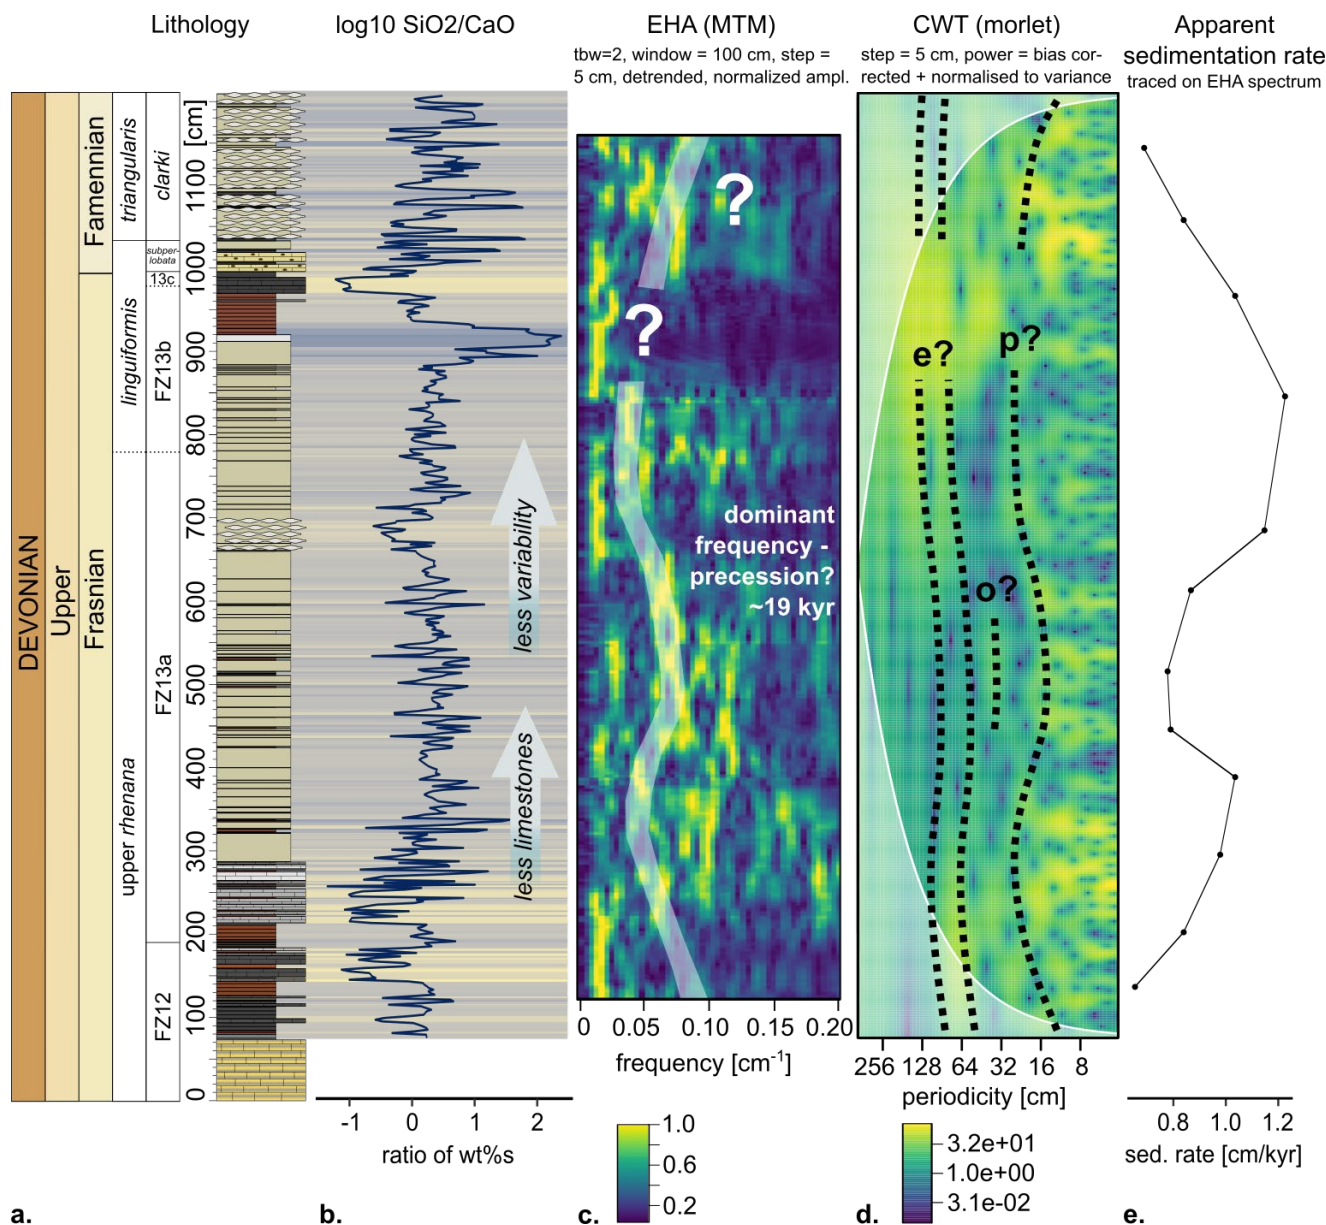

**a.** Conodont biostratigraphy and lithology of the section. **b.**  $\log_{10}(\text{SiO}_2/\text{CaO})$  record. The background is colour coded according to its values; dark blue for high  $\log_{10}(\text{SiO}_2/\text{CaO})$ , beige for low  $\log_{10}(\text{SiO}_2/\text{CaO})$ . This emphasizes the correlation between the  $\log_{10}(\text{SiO}_2/\text{CaO})$  record and the lithology. Gradual lithological changes (less limestone content, less overall variability) are marked with arrows. **c.** Evolutive Harmonic Analysis (EHA) plot of the  $\log_{10}(\text{SiO}_2/\text{CaO})$  record, suggesting sedimentation changes throughout the record. The frequency that was easiest to identify and tentatively interpreted as precession is marked with a transparent white band. This band was traced to generate figure 3e. **d.** Convolutional Wavelet Transform (CWT) of the  $\log_{10}(\text{SiO}_2/\text{CaO})$  record, showing similar but not identical changes to the EHA record. Interpretation of the periodicities are given, e = 100 kyr eccentricity, o = obliquity, p = precession. **e.** Sedimentation rate changes generated by tracing the frequency identified in figure c. A version of this figure without interpretations on c and d is shown in Fig. D2.



#### 4.2.2 Astrochronology

The astronomical time calibration of the Winsenberg section was carried out on the  $\log(\text{SiO}_2/\text{CaO})$  series. The MTM analysis of the  $\log(\text{SiO}_2/\text{CaO})$  record in the depth domain does not show a frequency distribution that can be readily interpreted as a Milanković imprint (Fig. D1). If a Milanković signature were present, it is likely distorted by changes in apparent sedimentation rate and/or differential compaction. Sedimentation rate changes and/or differential compaction are expected given the sedimentological changes throughout the section. The  $\log(\text{SiO}_2/\text{CaO})$  evolutive harmonic analysis (EHA) and continuous wavelet transform (CWT) spectra look similar and both reveal shifts in the dominant periodicities throughout the section (Fig. 5c, d). These shifts approximately coincide with changes in lithology, from shale to limestone to marl dominated, so it is plausible that these represent changes in accumulation rate (Fig. 5b). To correct for the changing sedimentation rate, the record was not split up according to lithological changes, as the resulting segments would be too short to assess aspects such as amplitude modulation. Instead, we opted for tracking accumulation rate changes throughout the record by manually tracing the clearest periodicity (10-25 cm) in the EHA spectrum (Fig. 5c). This approach can be considered as an evolutive minimal tuning approach. Frequency tracing was straightforward in the middle part of the record, but more complicated at the edges. The sharp peaks at the UKW especially distort the spectrum (Fig. 5b, c). The traced interpretation is less certain here and at the edges. Although the tracing itself was carried out on the EHA spectrum, observed shifts in the CWT spectrum were used as reference, as its signal is clearer in the lowermost and uppermost part of the record (Fig. 5c, d). To correct for accumulation rate changes, it is necessary to assign a set periodicity to the traced frequency. If one were to make no assumptions about what this periodicity might be, it could be set to an arbitrary value and converted to a ‘time domain’. However, there are several indications that the selected periodicity may reflect a precession imprint: 1) in the EHA plot, it shows the characteristic braiding pattern that arises from the interaction of the different precessional components (Fig. 5c); 2) the frequency range it occupies fits with the observed bundling in the lithology (Fig. 5a, b); and 3) there is a weak periodicity around 1 m that may correspond to short eccentricity in this interpretation (easier to observe in the CWT plot; Fig. 5d). The traced periodicity was converted to changes in apparent sedimentation rate (accumulation rate), by assigning the periodicity to 19-kyr precession (Fig. 5e). A duration of 19 kyr was chosen as an approximate average of all precessional components based on Waltham (2015) at 372 Ma. This step results in reconstructed sedimentation rate between 0.65 and 1.22 cm/kyr (Fig. 5e), which can be considered plausible for deep-water distal shales and carbonates. Finally, the accumulation rates were used to transfer all elemental proxy records, as well as the carbon isotope records, from the depth to the time domain (Fig. 6).



330

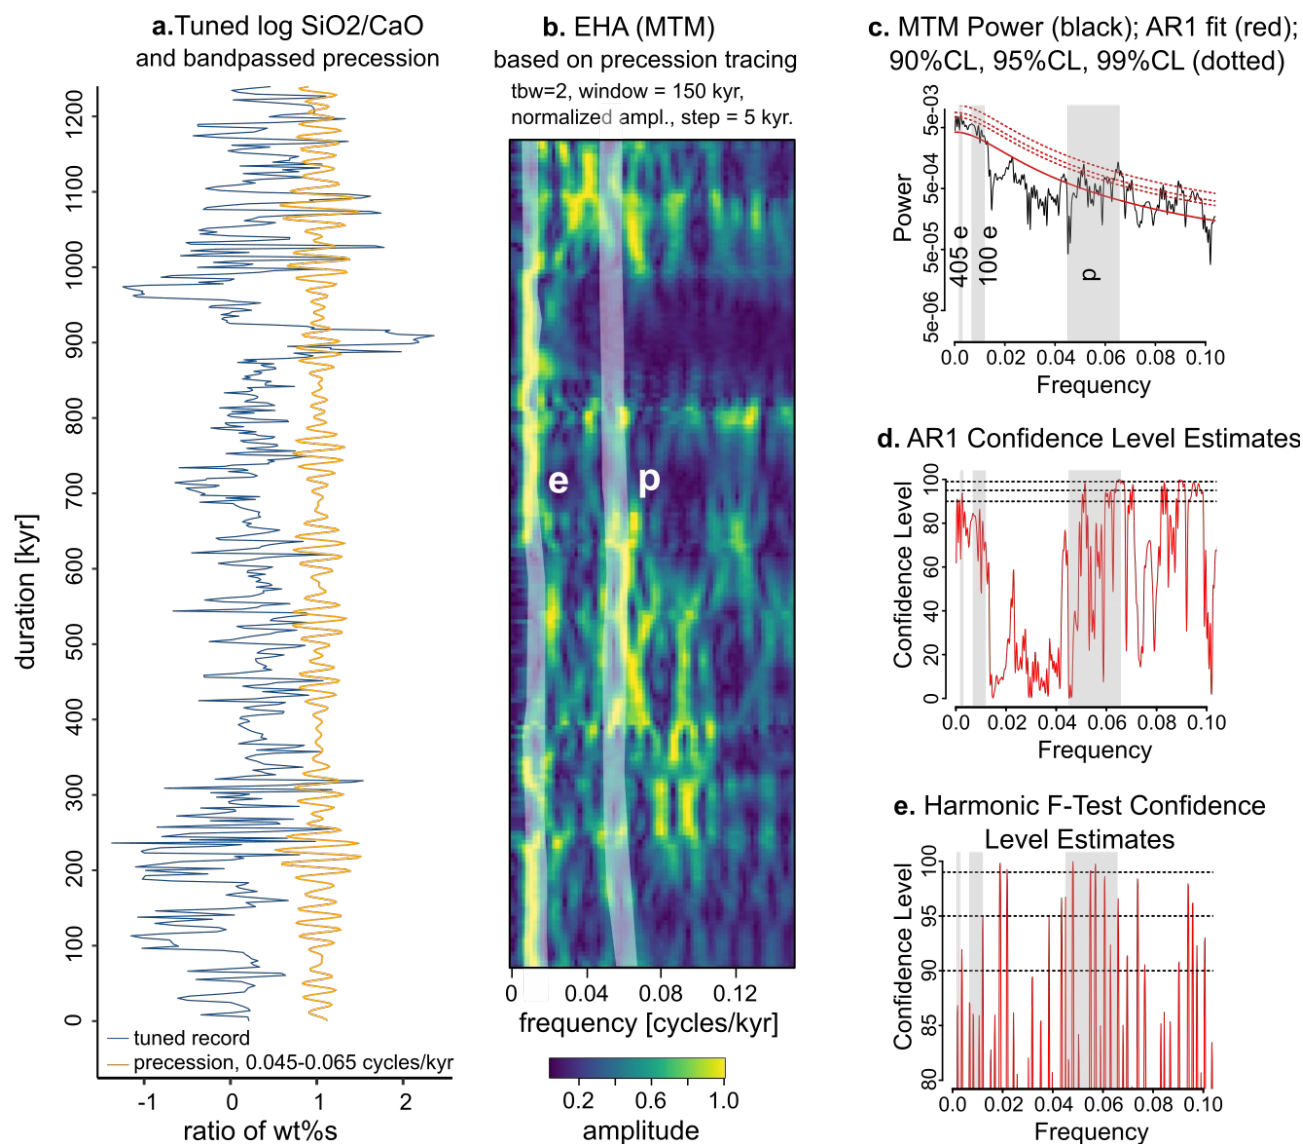

**Figure 6.** Time domain frequency analysis. a)  $\log(\text{SiO}_2/\text{CaO})$  time-series and bandpassed precession (amplitude true to scale, but shifted horizontally). b) Evolutive Harmonic Analysis (EHA) plot of the tuned  $\log(\text{SiO}_2/\text{CaO})$  record, indicating that the frequencies present are now mostly ‘straightened out’, i.e. the record has been corrected for sedimentation rate changes. c) MTM power spectrum of the tuned  $\log(\text{SiO}_2/\text{CaO})$  record, with 405 kyr eccentricity, 100 kyr eccentricity, and precession frequency intervals marked in grey. d) AR1 confidence level estimates, again with eccentricity and precession marked in grey. e) harmonic F-Test confidence estimates, again with eccentricity and precession marked in grey.



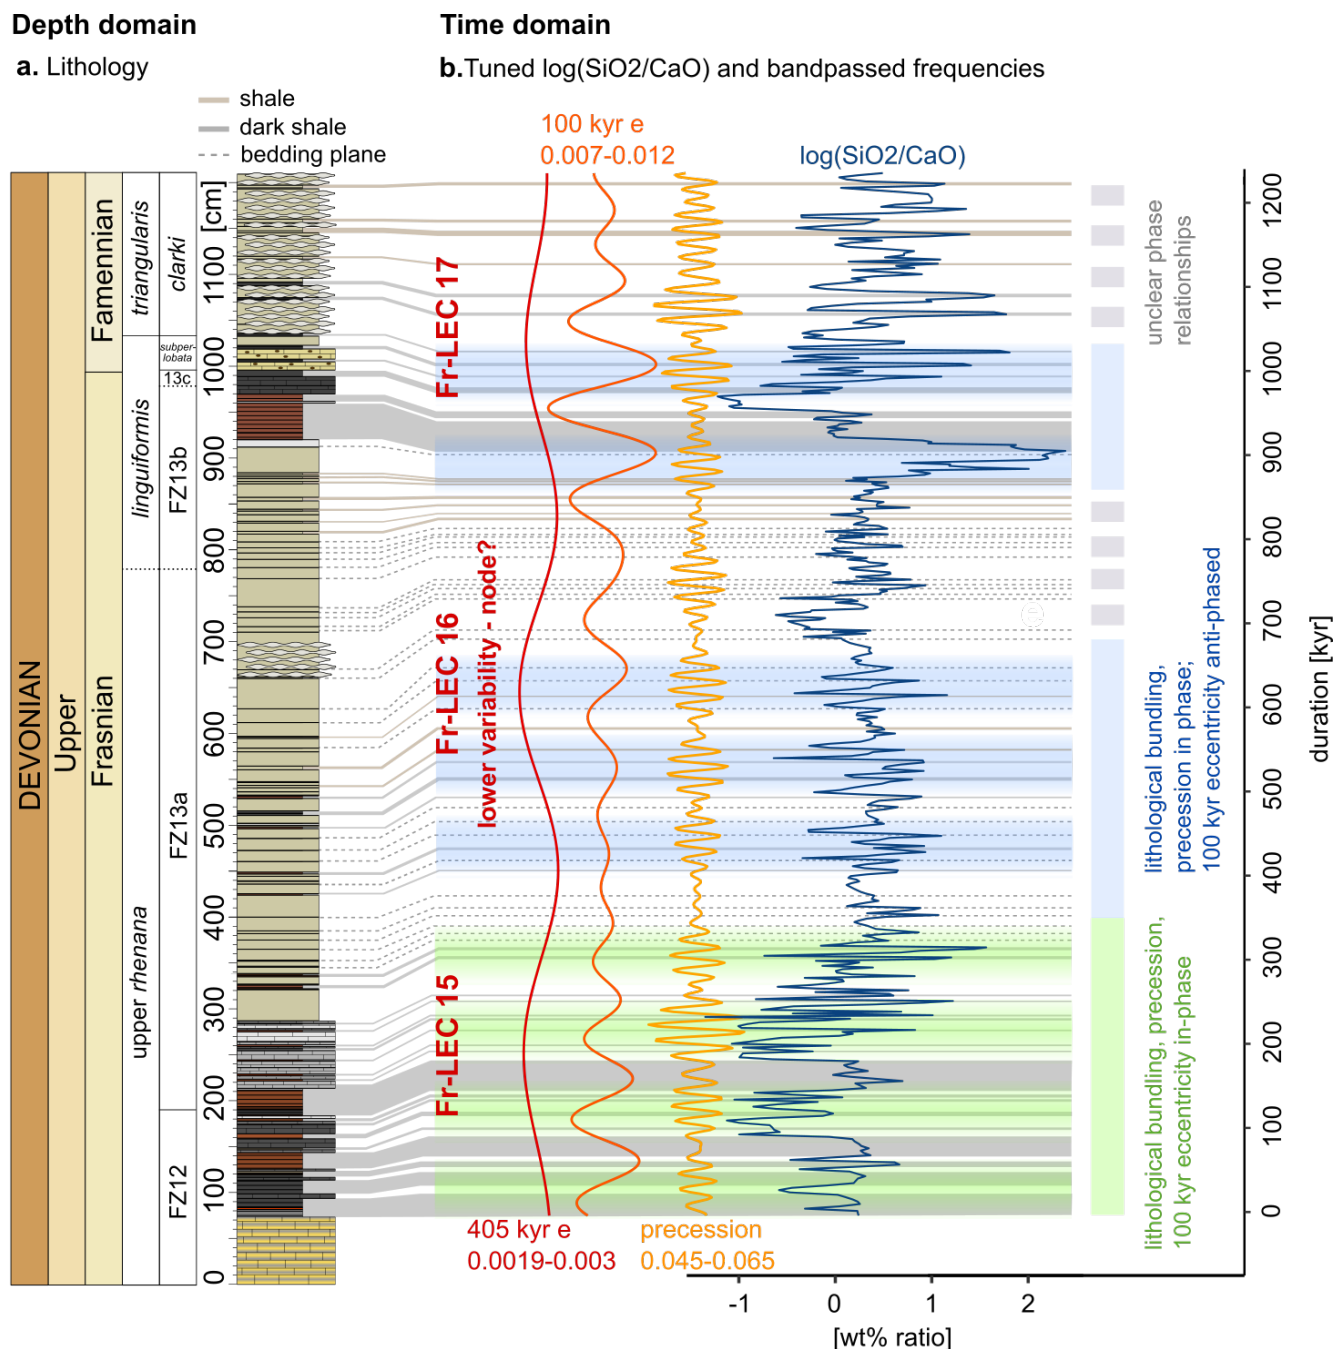

Figure 7. a) Depth domain biostratigraphy and lithology, correlated to the time domain in all shales, dark shales, and bedding planes. b)  $\log(\text{SiO}_2/\text{CaO})$  time-series and bandpassed 405 kyr eccentricity, 100 kyr eccentricity, and precession. Bandpass amplitudes are true to scale, but shifted relative to the  $\log(\text{SiO}_2/\text{CaO})$  record. The three identified 405-ky cycles that span the Kellwasser Crisis are marked Fr-LEC 15 to 17 (Fr-LEC = Frasnian Long Eccentricity Cycle). Intervals where there is a clear correlation between bundling observed in the lithology, the  $\log(\text{SiO}_2/\text{CaO})$  record, the precession filter, and the 100 kyr eccentricity filter, are marked in green and blue. Intervals where this correlation is less clear and the astrochronology is less certain are marked in grey.



### 4.2.3 Time domain

MTM spectral analysis applied to the time domain shows periodicities corresponding to precession, 100-kyr eccentricity, and  
335 405-kyr eccentricity. These are not all significant at the 90% confidence level (Fig. 6c-e). However, when these components  
are bandpass filtered, the amplitude modulation fits relatively well for all three cyclicities (Fig. 7b). Moreover, the bandpass  
filtered precession and 100 kyr eccentricity amplitude modulation pattern corresponds to the bundling observed in the rock  
record (Fig. 7a-b), including the regionally traceable thin black shales above the UKW (fa-bs 1 to 5). The fact that an  
astronomical signature is found in these regionally extensive beds supports an allogenic origin of the signal.

340 Not all stratigraphic intervals of the record are constrained equally well. Our confidence in the proposed astronomical  
interpretation is highest in the bottom half of the studied record (1-6 m; Fig. 7a), although we cannot exclude edge effects in  
the lowermost part. In this lower half, clear cycles in both lithology (bundling of shales and limestones, and grouping of these  
bundles) and elemental ratios can be observed in the depth domain (Fig. 7b). Further up section, the traced periodicity becomes  
obscured in the interval just below the UKW, the UKW horizon itself, and just above. This uncertainty results in a less robust  
345 astrochronology and phase relationship between lithological bundling and bandpassed eccentricity and precession in the upper  
half of the section (Fig. 7b). Especially within the UKW black shale, the astronomical imprint is more difficult to discern due  
to the sharp shifts in both lithology and the elemental ratios.

There is no power in the obliquity band (Fig. 6d). This result is not surprising as these sediments were deposited at the  
palaeotropics, where precession prevails. Other studies that found an obliquity signal in records of similar age and  
350 palaeolatitudes only observed it in carbon isotope records, not in XRF elemental records (Da Silva et al., 2020) or magnetic  
susceptibility records (De Vleeschouwer et al., 2017).

To assess the fit of the observed amplitude modulation more objectively, we employ the timeOpt approach (Meyers, 2015).  
TimeOpt assesses the amplitude modulation of a range of cycles, and matches the cycles with the optimal amplitude modulation  
fit to precession and 100 kyr eccentricity (or 100 kyr and 405 kyr eccentricity) for a range of plausible sedimentation rates  
355 (Meyers, 2015). However, it can also be used to confirm or dispute our interpretation of the amplitude modulation one observes  
in the time domain. For a time-calibrated record, confirmation of the astrochronology is attained when the optimal  
'sedimentation rate' as estimated by timeOpt is equal to 1 cm/kyr. This means that the amplitude modulation in the floating  
age-model corresponds to the 'best fit' as calculated by timeOpt(). Using this approach, we applied timeOpt() to the  
log(SiO<sub>2</sub>/CaO) time-series. The 'sedimentation rate' input ranges between 0.4 and 1.7, corresponding to a duration of 560 to  
360 2375 kyr for the Kellwasser Crisis as a whole (from the onset of the LKW  $\delta^{13}\text{C}$  excursion to the onset of the UKW  $\delta^{13}\text{C}$   
excursion) and ca. 700 to 3000 kyr for the sampled interval of the Winsenberg section. This duration range covers the minimum  
and maximum estimates for the duration of the Kellwasser interval currently available in literature (Whalen et al., 2017; Ma  
et al., 2022). The input eccentricity and precession periodicities were taken from Waltham (2015) at 372 Ma. Testing  
precession amplitude modulation resulted in an optimal sedimentation rate of 1.1 cm/kyr (Fig. 8a). The 10% deviation from 1



365 cm/kyr can be explained by the fact that precession was characterized as a single 19 kyr periodicity, instead of a combination of 4 components.

### Precession and 100 kyr eccentricity amplitude modulation

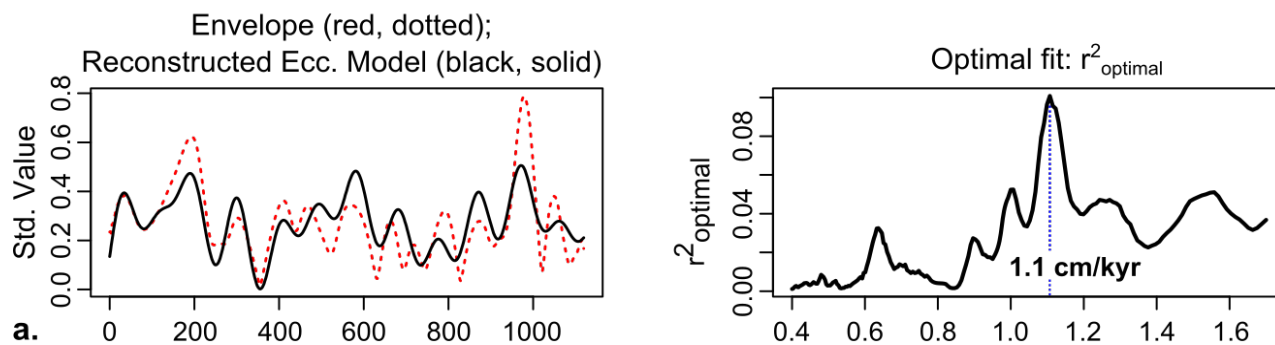

### 100 kyr and 405 kyr eccentricity amplitude modulation

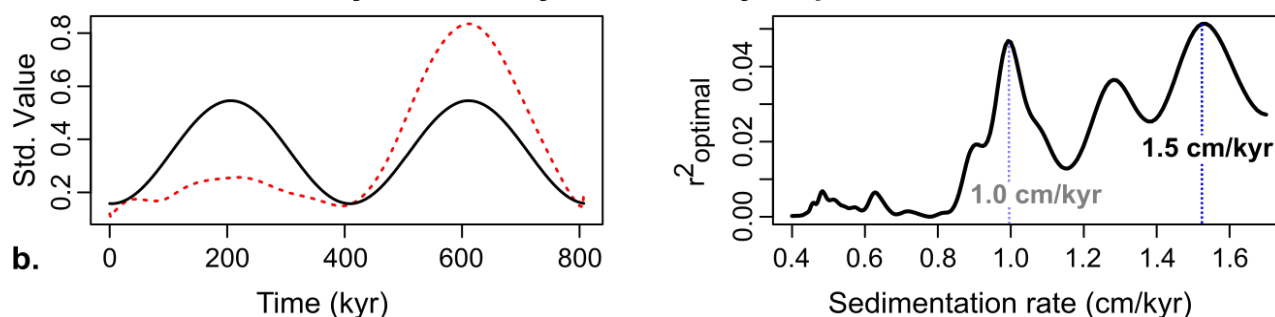

**Figure 8.** TimeOpt analysis of the time-calibrated log(Si/Ca) series in order to assess the amplitude modulation fit. In the different panels, actual and reconstructed amplitude envelopes are plotted on the left, and sedimentation rate optimization on the right. a) TimeOpt results for 100 kyr eccentricity amplitude modulation of precession. The sedimentation rate is 1.1 cm/kyr, close to unity. The corresponding optimal duration is ca. 1100 kyr for the entire record, and ca. 800 kyr for the LKW-UKW interval. b) TimeOpt results for 405 kyr eccentricity amplitude modulation of 100 kyr eccentricity. The sedimentation rate is 1.5 cm/kyr, far from unity. The corresponding optimal duration is ca. 800 kyr for the entire record, and ca. 600 kyr for the LKW-UKW interval. There is a second, almost equally strong peak around 1.0 cm/kyr, corresponding to ca. 1200 kyr for the entire record and ca. 900 kyr for the LKW-UKW interval.

In the timeOpt analysis that assesses the modulation of the 100 kyr eccentricity cycles by 405-kyr eccentricity, one obtains an optimal sedimentation rate of 1.5 cm/kyr, with only two instead of three 405-kyr cycles detected in the Winsenberg section (Fig. 8b). This result corresponds to a duration of 600 kyr for the Kellwasser Crisis, defined as the timespan between the onset of the LKW and UKW  $\delta^{13}\text{C}_{\text{carb}}$  excursions, and 800 kyr for the entire studied interval. This option implies that the LKW and UKW occur in two consecutive 405-kyr cycles, which has never been proposed in other cyclostratigraphic studies. However, there is a peak in optimal sedimentation rate at 1.0 cm/kyr as well, which is almost as high as the peak at 1.5 cm/kyr. In this scenario, the total Kellwasser Crisis corresponds to ca. 900 kyr and encompasses three 405-kyr cycles. The LKW thereby



375 occurred during the earliest one (Fr-LEC 15 in De Vleeschouwer et al., 2017) and the UKW during the last of them (Fr-LEC  
17), with a full 405-kyr cycle in-between the two Kellwasser events (i.e., Fr-LEC 16; Fig. 8b). As the precession-scale  
amplitude variability is considerably lower within Fr-LEC 16 compared to the other two cycles across all proxies, this cycle  
may represent a 2.4 Myr eccentricity node (see also section 4.3.4). This timeOpt result is in good agreement with the amplitude  
modulation of precession and eccentricity, as well as the observations in the lithology (Fig. 8b). We thus conclude that timeOpt  
380 reinforces our astronomical interpretation of a duration of 900 kyr for the Kellwasser Crisis at Winsenberg.

The duration of the interval just below and within the UKW horizon, from ca. 8.90 to 9.90 metres, cannot be precisely  
determined. Sharp shifts in the  $\log(\text{SiO}_2/\text{CaO})$  record, from very high values just below the UKW horizon to very low within  
the UKW limestones, hamper a robust astrochronology in this interval (Fig. 5a-c). However, if its depositional mechanism was  
similar to the LKW, the time present in one ca. 70 cm thick dark shale-black limestone grouping is about one 100-kyr short  
385 eccentricity cycle. The duration of LKW black shale deposition in our astrochronology is ~250 kyr, encompassing three such  
groupings (Fig. 7b). The UKW only contains one grouping, which is why we suggest a duration of ~100 kyr for UKW black  
shale deposition at Winsenberg. This implies that the five to six thin marl-limestone cycles recognized within the UKW at  
other sections, such as Schmidt Quarry or Aeke Valley (Schindler, 1990a), represent precession cycles. A similar result was  
also found for the eastern US (Lu et al., 2021).

390 Cyclostratigraphic duration estimates for the Kellwasser Crisis as a whole, as well as for the LKW and UKW events, show  
variations of several 100 kyr (Gong et al., 2001; Chen and Tucker, 2003; De Vleeschouwer et al., 2017; Whalen et al., 2017;  
Da Silva et al., 2020; Lu et al., 2021; Ma et al., 2022). We find ~900 kyr in-between the onset of the LKW and onset of the  
UKW carbon isotope excursion, which is within the range of previous estimates. While most previous duration estimates  
cluster around 500-600 kyr (Whalen et al., 2017; De Vleeschouwer et al., 2017; Da Silva et al., 2020; Lu et al., 2021), the  
395 current study still agrees with these interpretations regarding there being one 405-kyr eccentricity cycle in between the LKW  
and UKW. The difference in shape of  $\delta^{13}\text{C}$  curves from different sections may account for at least some of the discrepancies  
in duration estimates, as it is not always clear-cut where the base of an excursion should be defined.

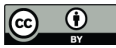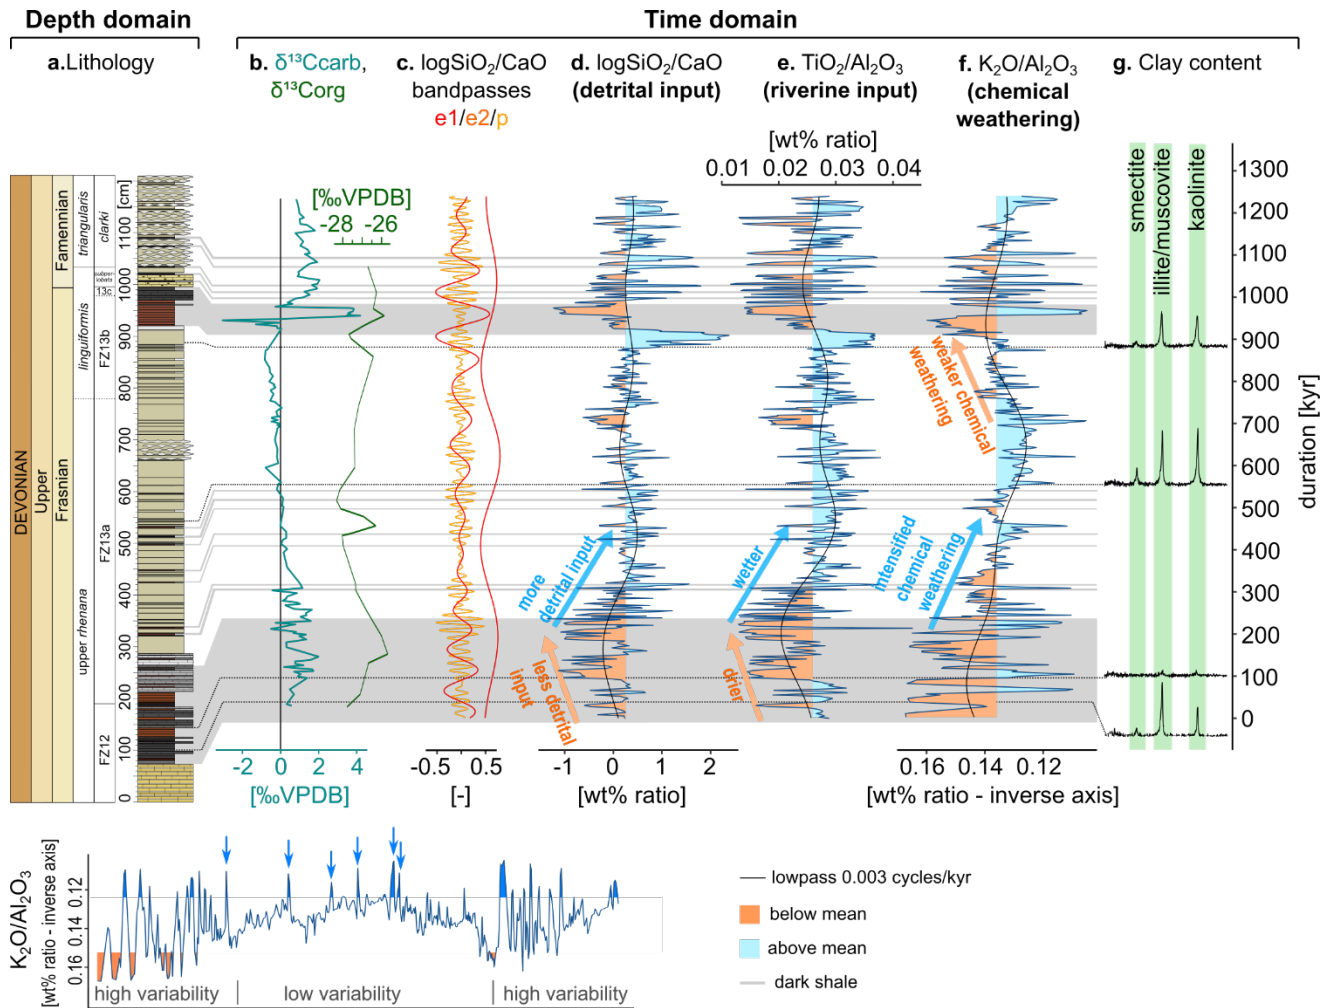

h. Clipped response

**Figure 9. Tuned proxy records.** a) Depth domain, biostratigraphy and lithological column. Dark (organic-rich) shale intervals are marked with grey bands and connect the depth and time domains. Panels b-h are in the time domain. b)  $\delta^{13}\text{C}$  records. c) 405-kyr eccentricity (e1), 100-kyr eccentricity (e2), and precession (p) filters extracted from the  $\log(\text{SiO}_2/\text{CaO})$  record (identical to the filters in Fig. 7b). d)  $\log(\text{SiO}_2/\text{CaO})$  record, interpreted as tracking total detrital input. e)  $\text{TiO}_2/\text{Al}_2\text{O}_3$  record, interpreted as tracking riverine input and therefore linked to precipitation and wet/arid climate changes. f)  $\text{K}_2\text{O}/\text{Al}_2\text{O}_3$  record, interpreted as tracking chemical weathering. Note that the y axis is inverted as low  $\text{K}_2\text{O}/\text{Al}_2\text{O}_3$  values correspond to more intense chemical weathering. In panels e-g, values below and above their respective mean are coloured to better visualise intervals dominated by low or high values. A lowpass filter at 0.003 cycles/kyr is added to better visualise low-frequency trends. g) Relative clay content throughout the section, as measured qualitatively through XRD. Three clay types are identified: smectite, illite/muscovite (could not be distinguished), and kaolinite. h)  $\text{K}_2\text{O}/\text{Al}_2\text{O}_3$  plot illustrating the clipped response, skewed towards intense chemical weathering even during the low-variability interval.



### 4.3 Paleoclimatic interpretation

#### 4.3.1 Phase relationships between proxies

All XRF-derived ratios (Fig. 9) exhibit precession cycles with 100-kyr eccentricity amplitude modulation, as well as 100-kyr eccentricity cycles modulated by 405-kyr eccentricity (Fig. D3). On precession and 100 kyr-eccentricity timescales, organic-rich shaly lithology,  $\text{SiO}_2/\text{CaO}$  (high detrital input),  $\text{TiO}_2/\text{Al}_2\text{O}_3$  (wetter climate), and  $\text{K}_2\text{O}/\text{Al}_2\text{O}_3$  (less weathering) exhibit positive correlation (Fig. 9d-f, note the inverted y axis of the  $\text{K}_2\text{O}/\text{Al}_2\text{O}_3$  record).  $\text{TiO}_2/\text{Al}_2\text{O}_3$ ,  $\text{SiO}_2/\text{CaO}$ , and  $\text{K}_2\text{O}/\text{Al}_2\text{O}_3$  are generally higher in shales and marls, and lower in carbonates (Fig. C5). This phase relationship is most clearly defined on precession scale, while still present on 100-kyr eccentricity scale, with less coherency. On timescales of several hundred kyrs,  $\text{K}_2\text{O}/\text{Al}_2\text{O}_3$  becomes anti-phased with  $\text{SiO}_2/\text{CaO}$  and  $\text{TiO}_2/\text{Al}_2\text{O}_3$  (Fig.9d-f). High  $\text{K}_2\text{O}/\text{Al}_2\text{O}_3$  values are interpreted as lower chemical weathering rates.

The interpretation of  $\text{K}_2\text{O}/\text{Al}_2\text{O}_3$  as a weathering signal is tentatively supported by the section's clay content as inferred from XRD analysis. Periods of weaker chemical weathering correspond to relatively low kaolinite content (relative to the other clay minerals), and higher abundance when weathering rates are high (Fig. 9f-g). Kaolinite forms under humid conditions that are conducive to intense chemical weathering (Robert and Chamley, 1987, and references therein). This result is consistent with the findings of Devleeschouwer et al. (2002) for sedimentary rocks from the Steinbruch Schmidt section, deposited on a pelagic seamount, albeit in shallower depth than Winsenberg. Their clay mineral analysis indicated that the highest kaolinite content occurs within the interval between the LKW and UKW horizons, while the highest illite content occurs in the dark Kellwasser intervals. Illite is thought to form under reduced chemical weathering conditions (Griffin et al., 1968). However, in this study its presence could not be distinguished from muscovite, which is known to occur at Winsenberg (Piecha, 1993; Becker et al., 2016b). The relative height of the illite/muscovite peak, however, follows the same pattern as found in Devleeschouwer et al., (2002) (highest in the Kellwasser horizons). Peak illite abundances in the Kellwasser horizons were also reported from the Anajdam section in the Moroccan Meseta (Riquier et al., 2007), which is significant as its provenance was from the continent of Gondwana rather than Euramerica. As weathering rates are predicted to increase in wetter climates, this anti-phasing of  $\text{TiO}_2/\text{Al}_2\text{O}_3$  and  $\text{K}_2\text{O}/\text{Al}_2\text{O}_3$  on longer timescales meets expectation. The phase relationship on shorter timescales, on the other hand, is counterintuitive.

#### 4.3.2 Long-term climatic trends

Riverine input ( $\text{TiO}_2/\text{Al}_2\text{O}_3$ ) and chemical weathering ( $\text{K}_2\text{O}/\text{Al}_2\text{O}_3$ ) proxies at Winsenberg covary on timescales of several hundreds of kyrs. The duration and timing of these runoff and weathering cycles suggest that they were paced by 405-kyr eccentricity (Fig. 9d-f). The runoff and weathering cycles exhibit a minimum around both the LKW and the UKW horizons, similar to Kellwasser beds in other settings and locations (Riquier et al., 2006; Pujol et al., 2006). Long-term wet/dry cycles are the most straightforward explanation for the covariance in these signals. Enhanced precipitation during wetter periods would result in more runoff, as well as provide the humid conditions that promote chemical weathering. The chemical



435 weathering signal may also be (partially) controlled by temperature, with higher temperatures accelerating the reactions associated with weathering. Global temperatures and atmospheric  $p\text{CO}_2$  were shown to be paced by the 405-kyr eccentricity cycle in the carbon cycle modelling study of Vervoort et al. (2021), but orbital-resolution temperature data for the Kellwasser Crisis is lacking (Zhang et al., 2021).

440 The steady decrease in  $\text{K}_2\text{O}/\text{Al}_2\text{O}_3$  between the base of the section to ca. 700 kyr suggests a gradual enhancement of chemical weathering and soil profile development. In optimal conditions (easily weathered basaltic bedrock, modern vegetation, tropical climate), potassium can be depleted from soils within 100 kyr, if no new material is being exhumed (Chadwick et al., 1999). The timescales of modern riverine source-to-sink pathways are also on the order of hundreds of thousands of years (Li et al., 2016). However, in this case, weathering rates may have been significantly slower, because of bedrock type (old red sandstone continent) and/or more primitive vegetation, and/or a continuous supply of new weathered material as plants colonised new areas (Smart et al., 2022). A steady increase in weathering rates over  $\sim 700$  kyr therefore seems plausible (Fig. 9f).

#### 4.3.3 Short-term climatic trends

445 All records show a higher variability during and in the immediate aftermath of both the LKW and the UKW horizons compared to the inter-Kellwasser interval, most clearly in the  $\text{K}_2\text{O}/\text{Al}_2\text{O}_3$  record (Fig. 9h). Wet-dry cycles paced by precession, as inferred from the  $\text{TiO}_2/\text{Al}_2\text{O}_3$  runoff proxy, suggest a monsoonal climate mechanism (Fig. 9c-e). This is supported by the broader context of the studied site. During the Kellwasser event, the study area was located at the southern palaeotropics (Blakey, 2016; Scotese, 2021). The likely Intertropical Convergence Zone (ITCZ) positions throughout the year would enable moisture transport to the hinterlands via trade winds (Fig. 2c, d). Lithological climate indicators in the hinterland suggest prevailing arid conditions via presence of evaporites, with wetting and drying cycles via presence of calcretes (Boucot et al., 2013; Cao et al., 2019). These wet-dry cycles are consistent with a Late Devonian monsoon system that was particularly sensitive to astronomical insolation forcing (De Vleeschouwer et al., 2014).

455 On these monsoonal timescales, however, riverine runoff and chemical weathering proxies are anti-phased. This counterintuitive correlation requires an explanation as it opposes the long-term signal. The change in the sign of the correlation also complicates identifying eccentricity minima and maxima. Both the  $\text{TiO}_2/\text{Al}_2\text{O}_3$  and  $\text{K}_2\text{O}/\text{Al}_2\text{O}_3$  records show a clipped response,  $\text{K}_2\text{O}/\text{Al}_2\text{O}_3$  more so than  $\text{TiO}_2/\text{Al}_2\text{O}_3$  (Fig. 9e, f, h). Across the record, wetter intervals and intervals with intense chemical weathering are similar in  $\text{TiO}_2/\text{Al}_2\text{O}_3$  and  $\text{K}_2\text{O}/\text{Al}_2\text{O}_3$  amplitude, respectively. The amplitude of the opposing signals, however, varies. The stable inter-Kellwasser interval is characterised by the absence of intense aridity and weak chemical weathering. If the inter-Kellwasser interval does represent a 2.4 Myr eccentricity minimum (see also section 4.3.4), the low-seasonal-contrast, minimal eccentricity climatic state is both rather wet and favours strong chemical weathering. Conversely, eccentricity-maxima are expected to be expressed as arid climates that favour weak chemical weathering. This is true for 405-kyr eccentricity, but not for 100-kyr eccentricity due to the anti-correlation on these timescales. This observation suggests that a different mechanism is controlling one of these proxies on  $\leq 100$  kyr timescales. With the limitations of the evidence at hand,



465 we propose several possible mechanisms that could explain the observed pattern: Temperature control, sea level overprint, and  
mechanical vs. chemical weathering – or a combination of either of the three.

On precessional timescales, chemical weathering may be primarily controlled by precession-driven temperature change, rather  
than precipitation change. An anti-correlation between riverine runoff and chemical weathering implies the alternation of wet-  
and-cool climates and arid-and-warm climates with weak or strong chemical weathering, respectively. This hypothesis is  
470 supported by Late Devonian climate modelling, showing wet-cool and arid-warm monsoonal cycles in southeastern equatorial  
Euramerica (De Vleeschouwer et al., 2014). Moreover, the simulated precession-forced mean annual temperature changes  
have wide range (24 – 28°C), which was at least equally important as precession-driven change in mean annual precipitation  
(1200-1620 mm/year) (De Vleeschouwer et al., 2014). Unfortunately, there is currently no astronomically-resolved  
temperature proxy series available to test this hypothesis at the precession scale.

475 Alternatively,  $\text{TiO}_2/\text{Al}_2\text{O}_3$  may be control by coastal position (sea level) rather than tracking precipitation on precessional  
timescales. A changing distance to the continent, re-routing of river discharge with changes of the coastline, and the  
presence/absence of estuaries that trap sediments could all result in  $\text{TiO}_2/\text{Al}_2\text{O}_3$  fluctuations at the studied site. There is  
evidence for rapid sea level change during this period (Johnson et al., 1985; Buggisch, 1991; Becker and House, 1994;  
Devleeschouwer et al., 2002; Racki, 2005; Bond and Wignall, 2008). However, there is no sea level record at the precession  
480 scale available to test this hypothesis. Moreover, disentangling sea level changes from climate changes (or processes that cause  
climate change) for distal marine sites is difficult, especially without rigid time control.

Finally, on short timescales, mechanical weathering and subsequent erosion may have dominated chemical weathering, even  
under humid climate conditions. During wet periods, both  $\text{TiO}_2/\text{Al}_2\text{O}_3$  and  $\text{K}_2\text{O}/\text{Al}_2\text{O}_3$  increase as bedrock (containing fresh  
titanium and potassium) and soils (containing leached potassium) are eroded and washed into the ocean. In modern catchments,  
485 chemical weathering responds on precession timescales (Clift et al., 2008). Even small primitive Devonian plants could have  
had a major effect on chemical weathering (Lenton et al., 2012). However, vegetation coverage was still mostly limited to  
coastal areas and lowlands in the Devonian (Gibling and Davies, 2012; Boyce and Lee, 2017). The chemical weathering taking  
place in these areas may not have been sufficed to override erosion from the more sparsely vegetated hinterland on these  
timescales. Testing this hypothesis requires modelling the response of Devonian vegetation to precipitation changes and  
490 subsequent weathering impacts (Boyce and Lee, 2017; Brugger et al., 2019).

#### 4.3.4 Do the Kellwasser Events coincide with a eccentricity maxima or minima?

The well-developed triplets (thin micritic limestone, thick marl, and a thin shale) in the inter-Kellwasser interval are interpreted  
as wet/dry precession cycles, with the highest  $\text{TiO}_2/\text{Al}_2\text{O}_3$  values occurring in the darker shales (Fig. 10, C5). Due to the low  
495 variability in both  $\text{TiO}_2/\text{Al}_2\text{O}_3$  and  $\text{K}_2\text{O}/\text{Al}_2\text{O}_3$  within the inter-Kellwasser interval, however, it is difficult to identify 100-kyr  
intervals with either high or low values and definitively link these to minima or maxima.





In the Kellwasser intervals, on the other hand, 100-kyr eccentricity is expressed as groupings of homogenous dark shales and limestone-shale couplets (Fig. 3a-d). Limestone-shale couplets occur in 100-kyr periods of low  $\text{TiO}_2/\text{Al}_2\text{O}_3$  and  $\text{K}_2\text{O}/\text{Al}_2\text{O}_3$  (Fig. 9a, e-f), with lowest  $\text{TiO}_2/\text{Al}_2\text{O}_3$  and  $\text{K}_2\text{O}/\text{Al}_2\text{O}_3$  in the limestone. The thickness of the (thicker) limestones varies while the (thinner) shales stays rather constant. While the cycles in the inter-Kellwasser interval are consistent with dilution cycles, the cycles within the Kellwasser intervals are therefore interpreted as carbonate productivity cycles. As most of the carbonate in the Winsenberg section is likely derived from more proximal settings, increased carbonate production can be linked to state of turbidity or eutrophication controlled by runoff (lower  $\text{TiO}_2/\text{Al}_2\text{O}_3$ ) and/or chemical weathering (lower  $\text{K}_2\text{O}/\text{Al}_2\text{O}_3$ ).

The limestone-shale couplet intervals in the Kellwasser beds represent the highest lithological variability and are, therefore, most likely to reflect eccentricity maxima. These intervals co-occur with intervals of a more arid climate (lower  $\text{TiO}_2/\text{Al}_2\text{O}_3$ , Fig. 9a, e). This pattern favours the interpretation that eccentricity maxima correspond to ‘more arid’ periods, at least in this region. More accurately, they reflect periods where both parts of the wet/dry precession cycle are expressed and precipitation was seasonally distributed across the year. This lower seasonality and weaker precession influence. This shift to an annually wet climate during eccentricity minima is supported by modelling of the Devonian climate response to astronomical forcing (De Vleeschouwer et al., 2014). The  $\text{K}_2\text{O}/\text{Al}_2\text{O}_3$  signal, then, is more likely to reflect a different controlling mechanism on  $\leq 100$  kyr timescales.

Ultimately, the exact mechanism linking astronomical forcing to runoff and chemical weathering changes cannot be determined with certainty from the data at hand. It can be inferred, however, that the studied location likely experienced precessional forcing of wet-dry monsoonal climate cycles during the Late Devonian.

#### 515 4.3.5 Timing of the Kellwasser Crisis relative to the long-term eccentricity cycle

As astronomical forcing influenced the climate during the Kellwasser Crisis, it may have played a role in the timing of the crisis as well. The current study finds mixed evidence regarding the hypothesis that the UKW began in the aftermath of a 2.4 Myr eccentricity minimum, but most observations are in support of it. All analysed proxies show high variability within and succeeding LKW and UKW strata, and just after the UKW, and low variability in between (Fig. 9). This pattern is consistent with a 2.4 Myr eccentricity node preceding the UKW. The astrochronological interpretation indicates one 405-kyr eccentricity cycle in between the LKW and UKW, with the UKW starting within the next 405-kyr cycle (Fig. 7b).  $\text{TiO}_2/\text{Al}_2\text{O}_3$ ,  $\text{K}_2\text{O}/\text{Al}_2\text{O}_3$  and clay records suggest a stable but wet climate in the inter-Kellwasser interval. The stability would allow for limited erosion, while the overall wet climate would facilitate vegetation growth, further enhancing soil formation (Algeo and Scheckler, 1998; see also Fig.1). Steady increase in chemical weathering similarly supports a long-term eccentricity minimum. Soil removal is likely to occur under strong wet-dry seasonality due to stronger and more frequent flood events. Similarly to climate modelling (De Vleeschouwer et al., 2014) evidence from this study links eccentricity minima with annually wet climates in this region. Yet, even within the inter-Kellwasser interval, clear precession amplitude modulation patterns occur in all proxy records and lithology bundles (Fig. 7b, Fig. 9). These patterns are not consistent with low eccentricity because amplitude modulation of precession in 100-kyr bundles is suppressed during a 2.4 Myr node. Moreover, we do not find any indications for an obliquity



530 signal in the pXRF-derived proxies. During an eccentricity minimum, the relative obliquity signal is expected to gain in power as it is the only orbital parameter not being suppressed (De Vleeschouwer et al., 2017). Unfortunately, the  $\delta^{13}\text{C}$  signal at Winsenberg shows low variability outside of the Kellwasser intervals, preventing its use in proving or disproving the presence of an obliquity peak just prior to the UKW.

Following the proposed 2.4 Myr eccentricity minimum, a stronger precession signal and enhanced seasonal contrasts would  
535 manifest as Earth's orbital configuration shifted to a more pronounced eccentricity. These are reflected in a larger variability across total detrital input, runoff, and chemical weathering proxies. Just prior to the UKW, total detrital input and runoff reach maximum values, consistent with a large influx of nutrient-rich terrestrial material. This influx could have triggered eutrophic conditions, especially in the hydrographically restricted marine basins (Carmichael et al., 2019). Terrestrially-derived eutrophication supports the 'top-down' model for anoxia during the Kellwasser, at least for settings on the continental shelf  
540 (Carmichael et al., 2019). A similar scenario has also been proposed for the Hangenberg Crisis at the end of the Devonian (Qie et al., 2023). Detrital pulses preceding Devonian anoxic events have been inferred for, [Lash \(2017\)](#) for the Kellwasser (Lash, 2017) and earlier Middle-Late Devonian anoxic events (Kabanov et al., 2023), although their interpretations differ (sea-level fall vs enhanced continental weathering). In pelagic settings of the Rhenish Massif, the spore influx was reduced prior to the UKW (Hartkopf-Fröder et al., 2007), which does not fit with an increased terrestrial influx to the oceans. Some uncertainty therefore  
545 remains regarding the role of continentally sourced nutrients causing anoxia.

If the timing of the UKW is controlled by a 2.4 Myr eccentricity node, then the timing of the LKW is not. In the presented astronomical interpretation, the LKW does occur just after a 405 kyr minimum (Fig. 7). [Lash \(2017\)](#) though there is no data prior to the LKW itself and the start of the [Lash \(2017\)](#) record may therefore be affected by spectral edge effects. A 405 kyr minimum would have led to similar conditions as a 2.4 Myr minimum, just much shorter in duration. The regolith 'nutrient gun' would therefore be less  
550 effective, which is in agreement with the less catastrophic nature of the LKW. This occurrence just after a 405 kyr minimum is suspicious, and the timing of the LKW may well have been controlled by orbital forcing as well. Cyclostratigraphic analysis of pre-LKW strata would be needed to confirm this. As the UKW itself, it requires an additional mechanism that persisted across the entire Kellwasser Crisis (such as volcanism—see discussion below) to explain why this 405 kyr node resulted in anoxia. [Lash \(2017\)](#) with this additional mechanism engaged was orbital forcing enough to push the climate system past its tipping  
555 point and into anoxia.

#### 4.3.6 Implications for the cause of the Kellwasser Crisis

The  $\text{K}_2\text{O}/\text{Al}_2\text{O}_3$  data suggests that the UKW was preceded by a prolonged period of intense chemical weathering, facilitated by a period of reduced seasonal contrast. However, Devonian carbon cycle perturbations and black shale deposition do not occur in regular 2.4-Myr intervals (Becker et al., 2020). The other Devonian perturbations were also not as severe as the  
560 Kellwasser Crisis (McGhee et al., 2013), with the end-Devonian Hangenberg event as a potential exception (Bambach, 2006; Kaiser et al., [Lash \(2017\)](#)). This points to additional, and perhaps different, underlying mechanisms for individual carbon cycle perturbations. Especially ocean circulation changes, both stagnation and rigorous overturning (Southam et al., 1982; Kabanov



et al., 2023), are important to consider as they can directly contribute to the observed anoxia ('bottom-up' deoxygenation). Lacking detailed bathymetry or oceanic crust for the Devonian, however, it is difficult to constrain this factor. We focus here  
565 on processes related to chemical weathering on the continents, as that is what the proxies available in this study can tell us. Land plant evolution, especially the development of extensive root systems and seeds, has long been hypothesised to have enhanced silicate weathering (Berner, 1992; Algeo and Scheckler, 1998). An orbitally-mediated stable wet period may have created the optimal conditions for seed plants to colonise the continents. Widespread LIP and arc volcanism also has the potential to increase silicate weathering efficiency via CO<sub>2</sub> outgassing that increases temperatures, as well as the emplacement  
570 of readily weathered fresh basalts in the case of continental volcanism (Racki, 2020; Kabanov et al., 2023). Volcanism, therefore, has the potential to cause a similar 'top-down'-induced anoxia. There is global evidence for volcanic activity around the Frasnian-Famennian boundary (Racki, 2005; Racki et al., 2018; Racki, 2020; Kaiho et al., 2021), although there are sometimes issues with the timing (Liu et al., 2021). Land plants could have acted in concert with widespread volcanism as well. The Retallack/Racki-Schobben hypothesis states that massive volcanic outgassing could have led to transient CO<sub>2</sub>-  
575 induced warming, resulting in the proliferation of land plants and large-scale biomass burial, which in turn led to cooling via CO<sub>2</sub> drawdown as well as a marine productivity boom via nutrient input, and ultimately anoxia (Pisarzowska and Racki, 2012). Alternatively, plants could have played a minor, amplifying and predominantly regional role in exacerbating anoxia (Kabanov et al., 2023) – this could also fit with the Winsenberg record, which records regional conditions in the hinterland. Rather than looking at the role of plant evolution as distinct adaptive pulses with immediate consequences, it can also be  
580 considered as a long-term change of certain boundary conditions. The eccentricity minimum hypothesis relies on the presence of a regolith that can respond to orbitally-forced climate change by growing thicker or eroding and thinning. Early Palaeozoic soils were very thin and immature in the absence of rooting land plants and burrowing organisms (Driese and Mora, 2001; Jutras et al., 2009; Mitchell et al., 2023). They likely had a very low 'buffering capacity' regarding orbital forcing. The capacity of the regolith to respond to orbital forcing therefore increased throughout the Devonian, influenced by land plant evolution  
585 (Driese and Mora, 2001; Genise et al., 2016; Alekseeva et al., 2016). Increasing vegetation lushness through time as ecosystems matured might also have increased the efficiency of nutrient output from these soils for a given weathering efficiency (D'Antonio et al., 2020). The presence of land plants, especially deep-rooted arborescent trees of the Late Devonian, may also have intensified the hydrological cycle (Berner, 1992; Boyce and Lee, 2017; Ibarra et al., 2019). A land-plant induced intensified hydrological cycle may also have strengthened the monsoonal response to orbital forcing.  
590 From this perspective, the introduction of (especially vascular and rooted) land plants may have been a facilitating long-term factor that made the Devonian climate system susceptible to anoxia, similar to palaeogeography and long-term climate modes. The greenhouse, mostly ice-free Devonian period saw wide cratonic overflooding and extensive shallow epicontinental seas (Kaiser et al., 2016; Scotese, 2021). Epicontinental seas were also widespread in the Cretaceous, another period punctuated by oceanic anoxia (Trabucho-Alexandre et al., 2012; Scotese, 2021; van der Meer et al., 2022). These shallow seas were prone to  
595 evaporation, eustatic, and climatic cycles (Johnson et al., 1985; Becker et al., 2020) and formed a basinal configuration that is conducive to black shale deposition (Trabucho-Alexandre et al., 2012). As with the Mesozoic oceanic anoxic events (OAEs),



Devonian anoxic events are all unique in the sense that they likely cannot all be explained by the exact same sequence of events (Jenkyns, 2010; Kabanov et al., 2023). For some events, perhaps just orbital forcing would have been enough to push the climate system past its tipping point in this anoxia-prone world. For other events, widespread volcanism might have been enough even without a favourable orbital configuration. And other events might be a ‘perfect storm’ of widespread volcanism and orbital forcing. Such a combination of orbital forcing and volcanism has been proposed for Mesozoic OAEs (Batenburg et al., 2016; Ait-Itto et al., 2023). Considering the well-documented evidence for widespread volcanism around the Frasnian-Famennian boundary (e.g., Racki, 2005, 2020 and references therein) and the growing body of work indicating an orbital influence on the timing of the Crisis (De Vleeschouwer et al., 2017; Da Silva et al., 2020; Ma et al., 2022; this study), the Kellwasser Crisis may well have been one of these perfect storms.

## 5 Conclusions

Cyclostratigraphic analysis of the Winsenberg Road Cut section in the Rhenish Massif, Germany, estimates the duration of the Kellwasser Crisis at ca. 900 kyr (from the start of the Lower Kellwasser carbon isotope excursion to the start of the Upper Kellwasser excursions). The Lower Kellwasser spanned ca. 250 kyr, while the Upper Kellwasser duration is estimated at ca. 100 kyr. These values fall within the range of previous duration estimates. The confidence in the astrochronological interpretation changes throughout the record. In some intervals, there is a rather large uncertainty, but in other intervals, climate interactions can be discerned at a precession scale. The phase relationships between proxies change depending on the timescale. On 100-kyr eccentricity and precession timescales, eccentricity-modulated precession forcing of the monsoon is inferred from terrestrially sourced proxy records. Total detrital and riverine input are out of phase with chemical weathering, a counterintuitive observation which can have multiple causes. On 405-kyr eccentricity timescales, total detrital and riverine input are in phase with chemical weathering, suggesting long wet-dry climate cycles. The Lower and Upper Kellwasser occurred within drier, but highly variable climates. During the inter-Kellwasser interval, a wetter but more stable climate with high chemical weathering rates prevailed. This stable period is linked to a 2.4 Myr eccentricity minimum characterised by prolonged low seasonal contrasts. It therefore lends support to the ‘eccentricity minimum’ hypothesis, which poses that Upper Kellwasser anoxia developed as a result of long-term nutrient build-up on the continents during this eccentricity minimum, followed by the release of these nutrients to the oceans and subsequent eutrophication once the climate system came out of this long stable period. This model is also consistent with a ‘top-down’ development of anoxia for the Kellwasser Crisis, although this may be a regional signature. Both widespread volcanism and the expansion of land plants can intensify chemical weathering and lead to eutrophication, and both have been proposed as causes for the Kellwasser Crisis before. Here, it is proposed that long-term changes to the climate system’s boundary conditions induced by land plants (soil development, intensification of the hydrological cycle) increased the capacity of the Earth’s climate to respond to orbital forcing. With that, the capacity of orbital forcing to tip the climate system over a tipping point increased as well, leading to the prevalence of

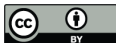

anoxic events in the Middle and Late Devonian. The Kellwasser Crisis itself is thought to have been a combination of orbital forcing, controlling the timing, and widespread volcanism, but other causes (still) cannot be ruled out.



630 **Appendices**

**Appendix A. Lithology of the Winsenberg section**

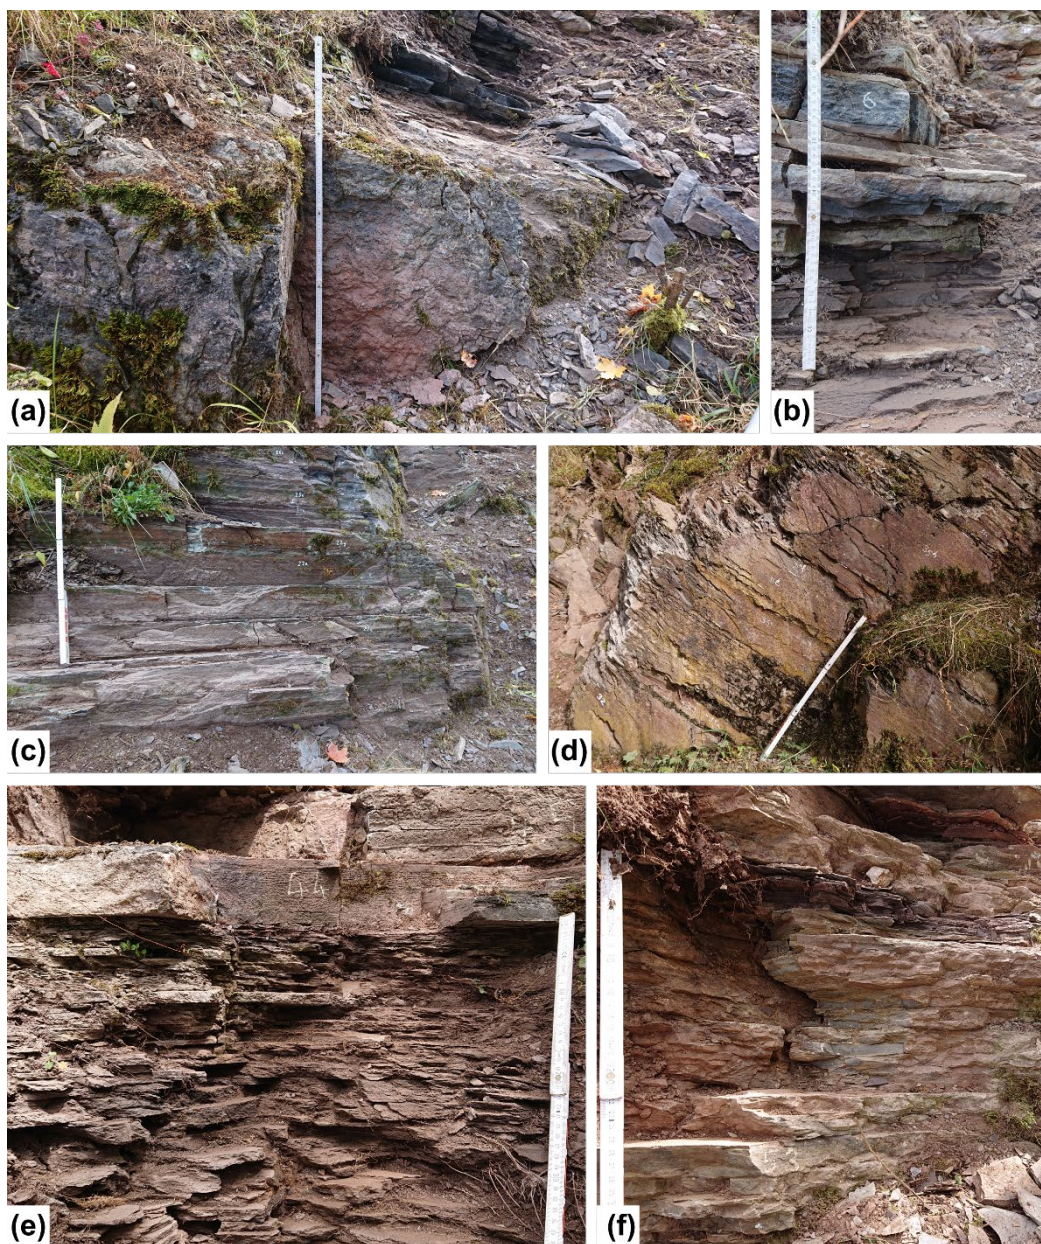

635 **Figure A1.** Overview photos of the Winsenberg outcrop. (a) Usseln Limestone just below the LKW. Ruler for scale (1 m). (b) Detail of black shales and limestones (bed 6) in the LKW. Ruler for scale, ca. 46 cm here. (c) Winsenberg Fm facies in between the LKW and UKW. Ruler for scale, ca. 60 cm here. (d) Winsenberg Fm beds just below the UKW. Ruler for scale, ca. 60 cm here. (e) Black shales and limestones (beds 44 and 45) in the UKW. Ruler for scale, ca. 35 cm here. (f) Nodular thinly bedded limestones and thin black shales above the UKW. Ruler for scale, ca. 30 cm here.

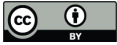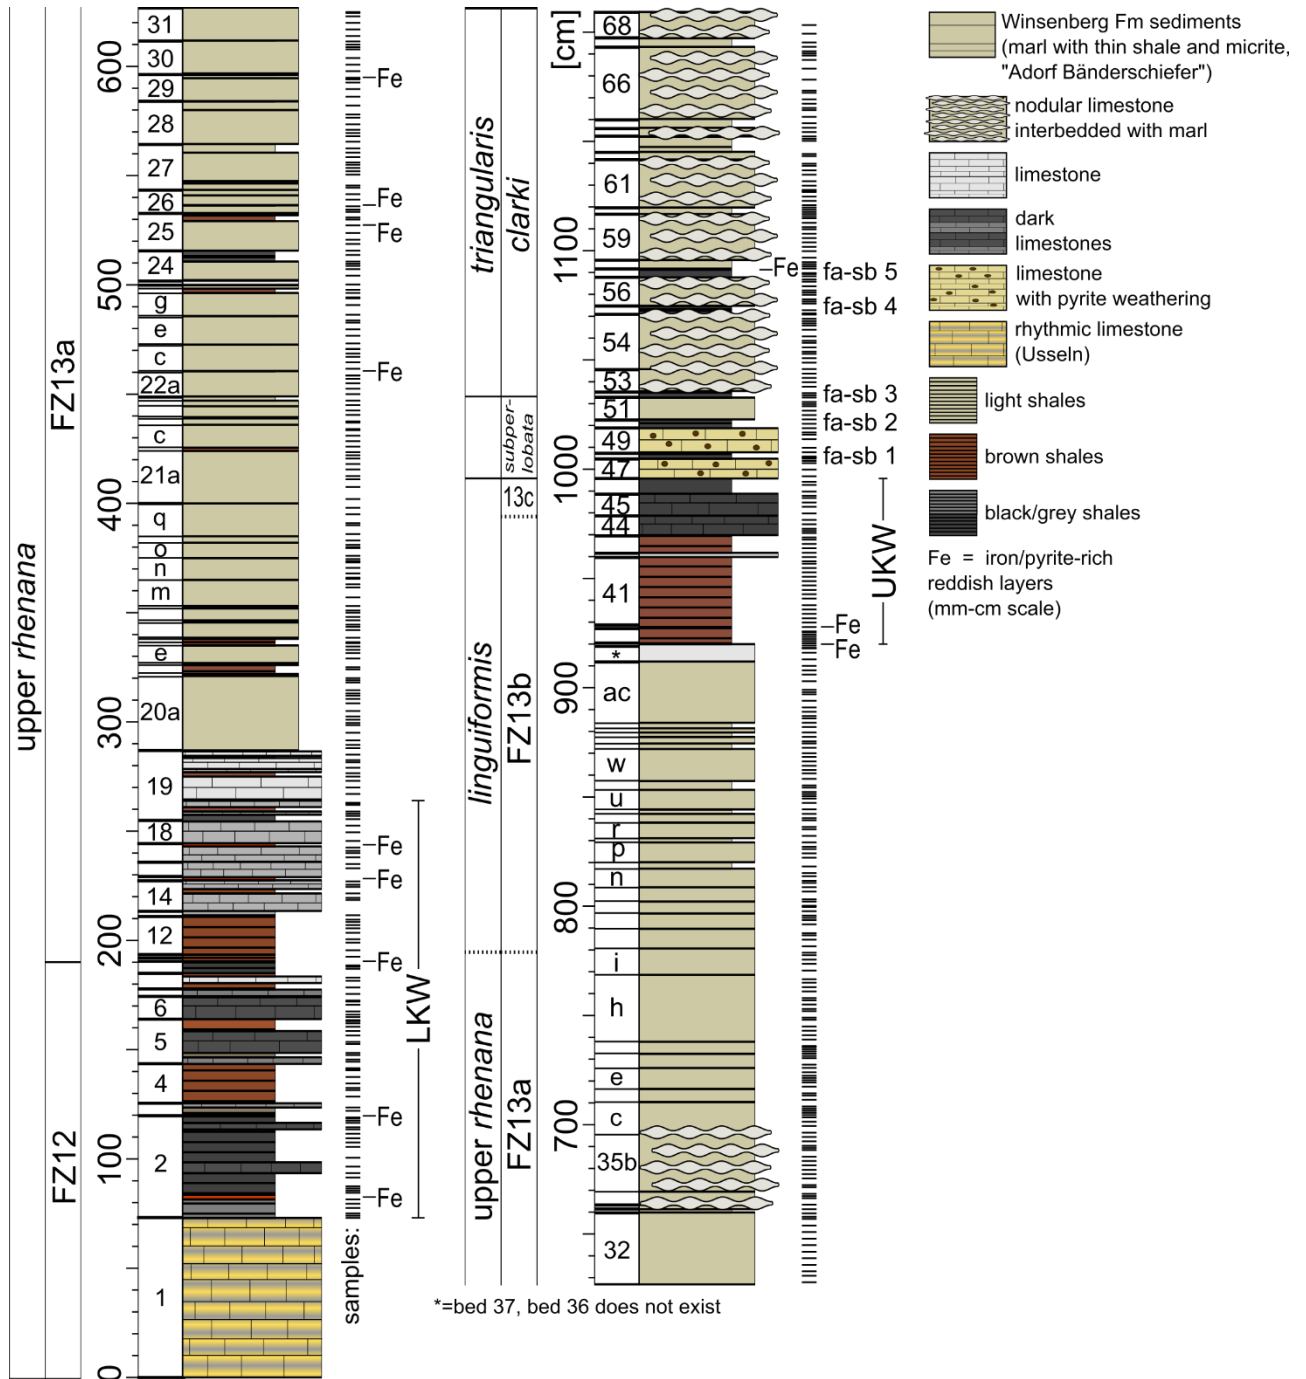

640 Fig. A2. Expanded log of the Winsenberg Road Cut section with bed numbering, sample placement, and additional information on iron and/or pyrite-rich mm to cm thick seams. Exact samples heights and corresponding beds can be found in the supplementary materials.



## Appendix B. Grain-size analysis

645 Grain size analysis was carried out for a set of samples (black shale, grey shale, marl, and limestone) in order to ensure that  
the grain-size distribution was narrow enough to limit the grain size effect associated with XRF (Claisse and Samson 1961).  
Particle-size measurements were performed in the Particle-Size Laboratory at MARUM, University of Bremen with a  
Beckman Coulter Laser Diffraction Particle Size Analyzer LS 13320. Prior to the measurements, the terrigenous sediment  
fractions were isolated by removing organic carbon, calcium carbonate, and biogenic opal by boiling the samples (in about  
200 ml water) with 10 ml of H<sub>2</sub>O<sub>2</sub> (35%; until the reaction stopped), 10 ml of HCl (10%; 1 min) and 6 g NaOH pellets (10  
650 min), respectively. After every preparation step the samples were diluted (dilution factor: >25). Finally, remaining aggregates  
were destroyed prior to the measurements by boiling the samples with 0.3 g tetra-sodium diphosphate decahydrate (Na<sub>4</sub>P<sub>2</sub>O<sub>7</sub>  
\* 10H<sub>2</sub>O, 3 min) (see also McGregor et al., 2009). Sample preparation and measurements were carried out with deionized,  
degassed and filtered water (filter mesh size: 0.2 µm) to reduce the potential influence of gas bubbles or particles within the  
water. The obtained results provide the particle-size distribution of a sample from 0.04 to 2000 µm divided in 116 size classes.  
655 The calculation of the particle sizes relies on the Fraunhofer diffraction theory and the Polarization Intensity Differential  
Scattering (PIDS) for particles from 0.4 to 2000 µm and from 0.04 to 0.4 µm, respectively. The reproducibility is checked  
regularly by replicate analyses of three internal glass-bead standards and is found to be better than ±0.7 µm for the mean and  
±0.6 µm for the median particle size (1□). The average standard deviation integrated over all size classes is better than ±4  
660 vol% (note that the standard deviation of the individual size classes is not distributed uniformly). All provided statistic values  
are based on a geometric statistic. Portable XRF results were shown to be similar for intermediate (125-250 µm) and fine (63-  
125 µm) powders by Quye-Sawyer et al. (2015). The powders were therefore not ground down to a finer grain size.





### Appendix C. pXRF elemental analysis

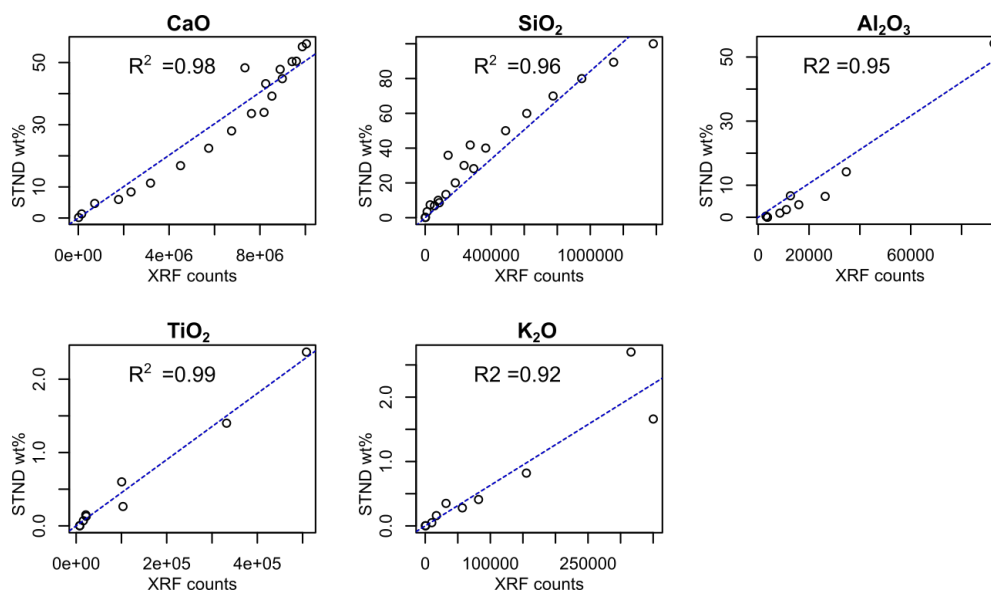

665 **Figure C1.** Scatterplots of the pXRF counts versus standard concentrations in wt% for the elements used in this study, used to construct linear calibrations for each element (blue dotted line). Measured on a set of 11 sedimentary standards, as well as synthetic  $\text{CaCO}_3$ - $\text{SiO}_2$  mixtures.

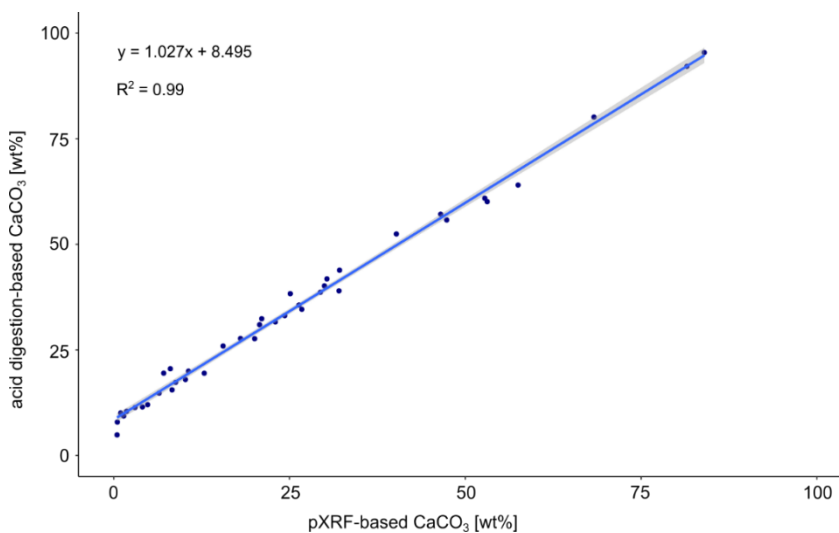

670 **Figure C2.** Scatterplot showing the pXRF-based  $\text{CaCO}_3$  versus acid digestion-based  $\text{CaCO}_3$  content of a subset of samples from the Winsenberg section. While there is a ca. 8 wt% offset between the two, the slope is close to unity and the fit is good ( $R^2=0.99$ ), suggesting that the trend in  $\text{CaCO}_3$  as estimated from pXRF is reliable.

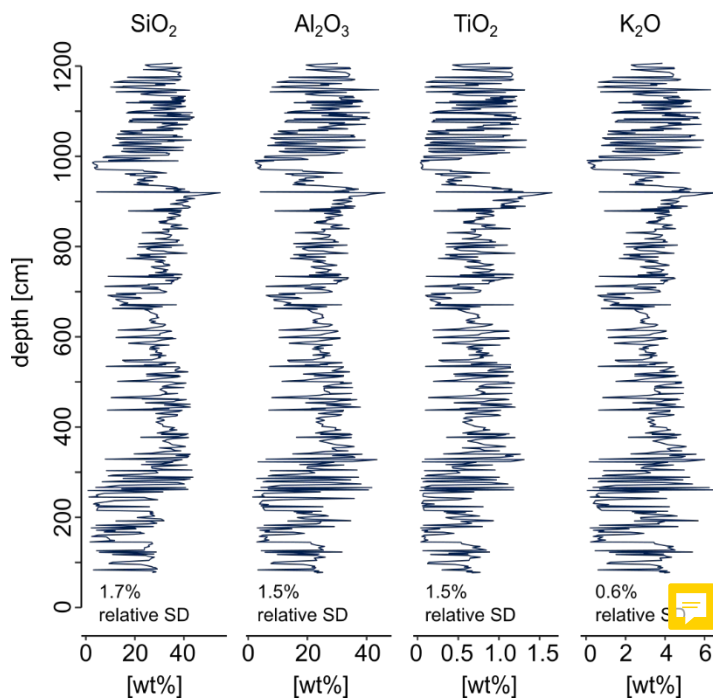

**Figure C3.** pXRF-generated depth records of selected oxides. Their similar behaviour is interpreted as all of them having the same dominant detrital source.

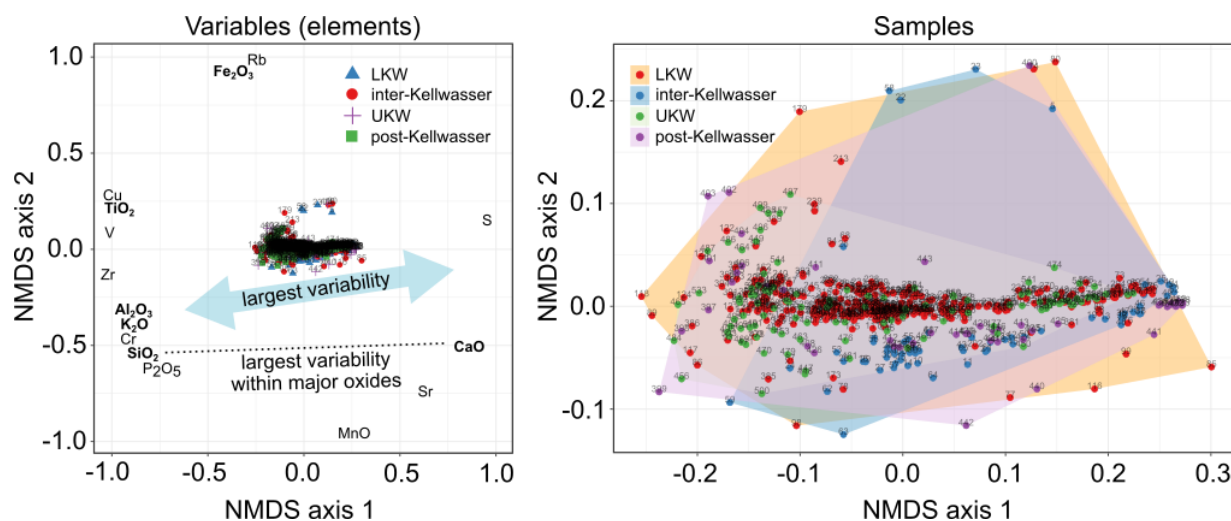

675

**Figure C4.** Results of Non-Metric Multidimensional Scaling (NMDS) analysis of pXRF-generated elements. On the left the elements are plotted in NMDS space along with all measured samples. On the right, only the samples are plotted, grouped by stratigraphic interval. The largest variability within the major oxides is represented by the CaO – SiO<sub>2</sub> axis.

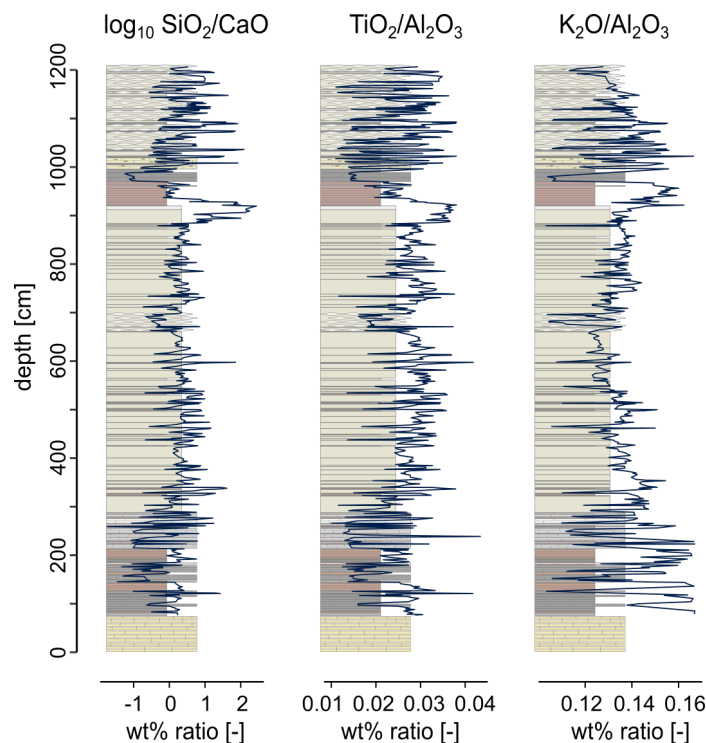

680 **Figure C5.** Proxies in the depth domain, showing that, despite subtle changes, all three signals are similar and therefore likely all track detrital (terrestrial) signals. Lithologs are plotted in the background to indicate the proxies' relationship to the lithology.

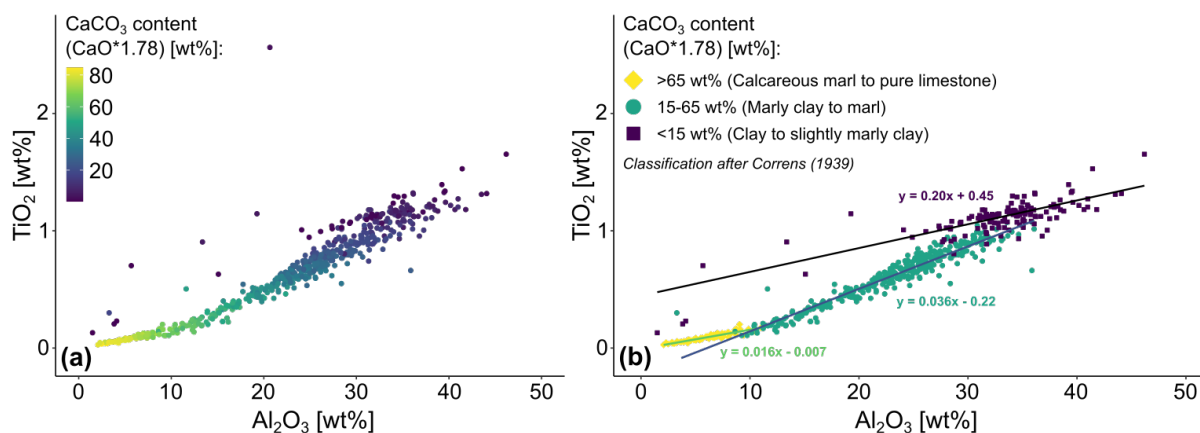

685 **Figure C6.**  $\text{TiO}_2$  vs  $\text{Al}_2\text{O}_3$  scatterplots, coloured by carbonate content (estimated as  $\text{CaO} \cdot 1.78$  to obtain wt%  $\text{CaCO}_3$ ). All measured pXRF datapoints are included. a)  $\text{TiO}_2$  vs  $\text{Al}_2\text{O}_3$  scatterplot coloured using a continuous colour scale for  $\text{CaCO}_3$  content. It is clear from this plot that the data cannot be represented by a single slope. b) same data as a), now with three discrete ranges of carbonate content and corresponding slopes identified. The carbonate cut-off values of 15 and 65 wt% were chosen to reflect the observed changes in slope, while still adhering to an existing classification scheme (here: Correns, 1939). These distinct  $\text{TiO}_2$ - $\text{Al}_2\text{O}_3$  relationships within the different lithologies point to an environmental, rather than a purely diagenetic origin of the  $\text{TiO}_2$ - $\text{Al}_2\text{O}_3$  signal (for an explanation see Nohl et al., 2021). Note that the pXRF results are only semi-quantitative and that the values on the x and y axes are therefore estimates.



## 690 Appendix D. Spectral analysis

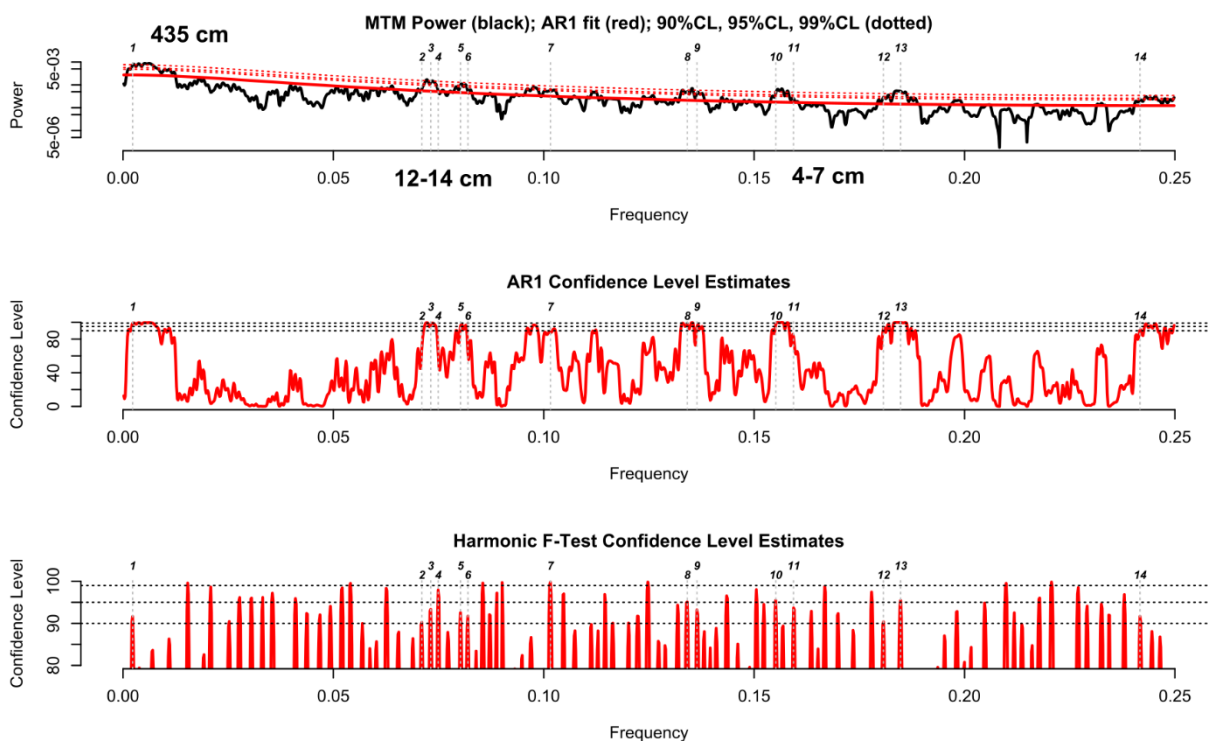

**Figure D1.** Multi-taper method spectral analysis of the detrended  $\log_{10}(\text{SiO}_2/\text{CaO})$  record along with confidence level estimates, generated in astrochron. The significant periodicities at 90%CL are noted in the top plot (duration in cm).

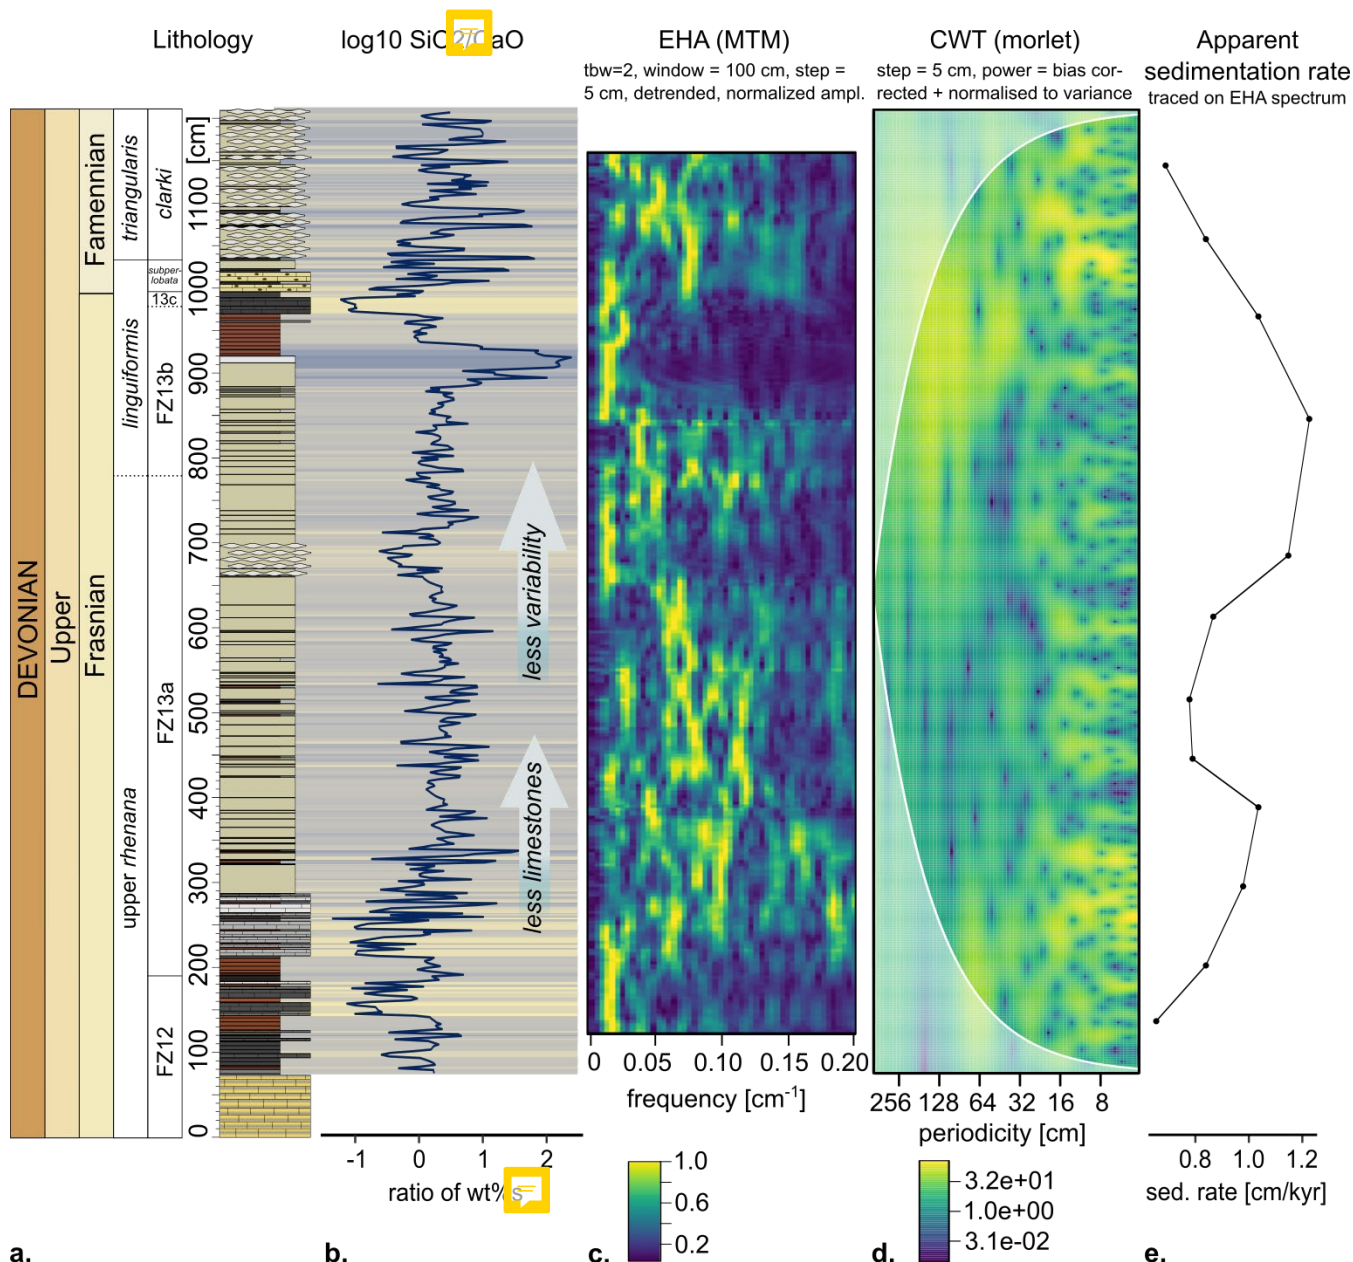

695 **a.** Figure D2. Depth domain analysis of the  $\text{SiO}_2/\text{CaO}$  signal, with cyclostratigraphic interpretations removed. **a)** Conodont  
 biostratigraphy and lithology of the section. **b.)**  $\log_{10}(\text{SiO}_2/\text{CaO})$  record. The background is colour coded according to its values;  
 dark blue for high  $\log_{10}(\text{SiO}_2/\text{CaO})$ , beige for low  $\log_{10}(\text{SiO}_2/\text{CaO})$ . This emphasizes the correlation between the  $\log_{10}(\text{SiO}_2/\text{CaO})$   
 700 record and the lithology. Gradual lithological changes (less limestone content, less overall variability) are marked with arrows. **c)**  
 Evolutive Harmonic Analysis (EHA) plot of the  $\log_{10}(\text{SiO}_2/\text{CaO})$  record, suggesting sedimentation changes throughout the record. **d)**  
 Convolutional Wavelet Transform (CWT) of the  $\log_{10}(\text{SiO}_2/\text{CaO})$  record, showing similar but not identical changes to the EHA  
 record. **e)** Sedimentation rate changes generated by tracing the frequency identified in figure 3c.

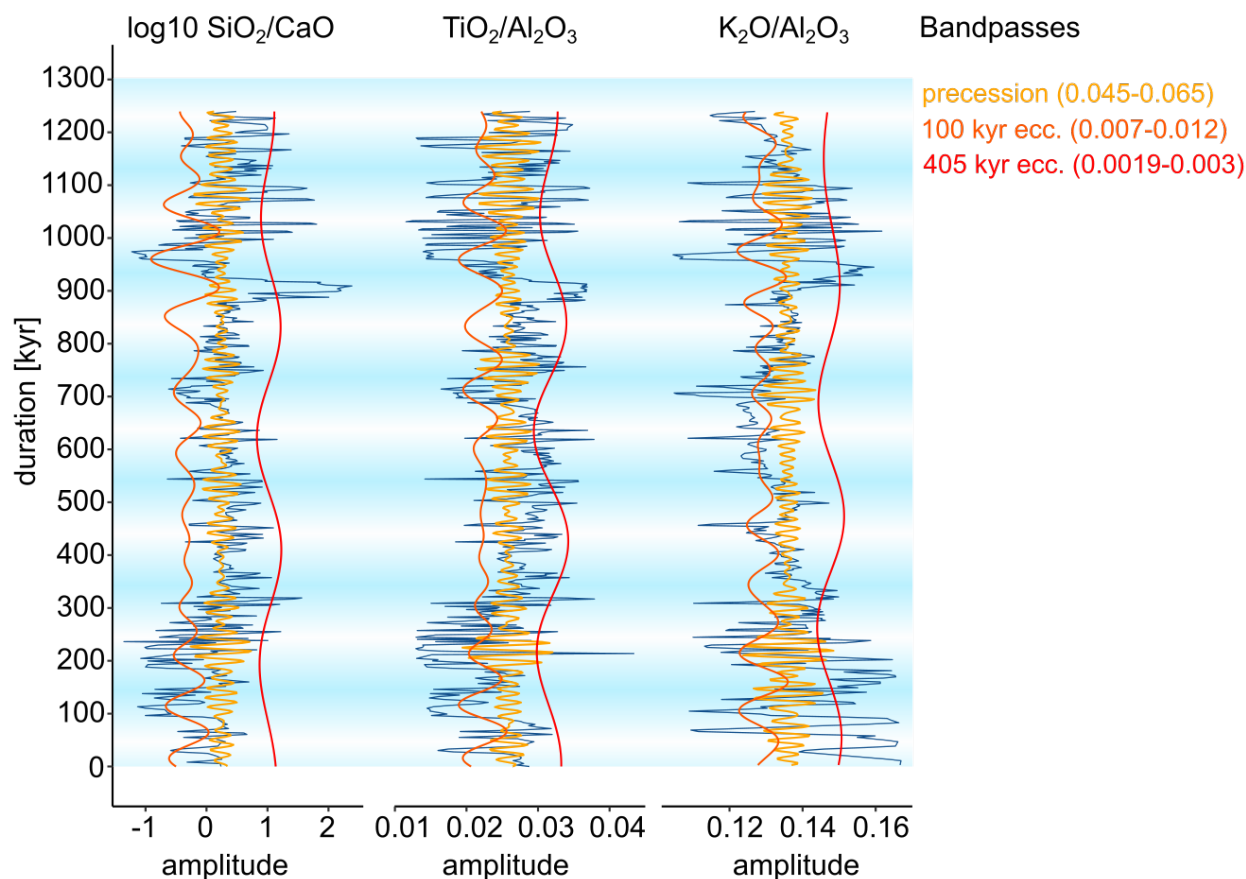

**Figure D3.** Astrochronologically-calibrated proxy records with bandpassed precession, 100 kyr eccentricity, and 405 kyr eccentricity. The general patterns are similar across all proxies, including amplitude modulation patterns, but there are mismatches between them as well. 100 kyr bands (defined by the duration axis on the left) are indicated in blue and white to allow for better comparison between the three proxy records.

#### 705 Code availability

A Zenodo DOI will be provided at a later stage by the authors.

#### Data availability

A PANGAEA DOI will be provided at a later stage by the authors.

#### Author contribution

710 NW sampled the section, carried out pXRF and carbon isotope analyses, carried out spectral analysis, did the initial data interpretation, and wrote the original manuscript. DDV designed the study and oversaw pXRF and spectral analysis. NW, TN,



715

LMP and DDV collected the samples. OMB and LMP assisted with the interpretation of geochemical data. TN carried out the interpretation of diagenetic signatures. RTB assisted with lithological interpretations and regional geological correlations. PK and PC assisted with the pXRF calibration. All authors contributed to the editing of the manuscript and discussion of its contents.

### Competing interests

The authors declare that they have no conflict of interest.

### Acknowledgements

The German Research Foundation (DFG) provided funding for the PhD project of Nina Wichern through Project 451461400 (VL96/4-1). This project is part of IGCP-652 “Reading Time in Palaeozoic sedimentary rocks”. DDV acknowledges the support of the CycloNet project, funded by the Research Foundation Flanders (FWO, grant nr. W000522N). The authors thank Rohit Samant (University of Bremen) for assisting with pXRF sample preparation; Artur Fugmann (University of Münster) for carrying out the carbonate carbon isotope measurements; Jürgen Titschack (MARUM, Bremen) for carrying out grain-size measurements; Peter Schmid-Beurmann (University of Münster) for carrying out XRD measurements; and Benjamin Bomfleur (University of Münster) for discussions about the feedback mechanisms between climate, carbon cycle and Devonian land plants. Nina Wichern thanks the DAAD for a travel grant to present this work at the 2023 Subcommission on Devonian Stratigraphy meeting in Geneseo, NY, USA.

### References

- Ait-Itto, F.-Z., Martinez, M., Deconinck, J.-F., and Bodin, S.: Astronomical calibration of the OAE1b from the Col de Pré-Guittard section (Aptian–Albian), Vocontian Basin, France, Cretaceous Research, 105618, <https://doi.org/10.1016/j.cretres.2023.105618>, 2023.
- Alekseeva, T., Kabanov, P., Alekseev, A., Kalinin, P., and Alekseeva, V.: Characteristics of early Earth’s critical zone based on middle–late Devonian paleosol properties (Voronezh high, Russia), clays clay miner, 64, 677–694, <https://doi.org/10.1346/CCMN.2016.064044>, 2016.
- 735 Algeo, T. J. and Scheckler, S. E.: Terrestrial-marine teleconnections in the Devonian: links between the evolution of land plants, weathering processes, and marine anoxic events., Philosophical Transactions of the Royal Society of London. Series B: Biological Sciences, 353, 113–130, <https://doi.org/10.1098/rstb.1998.0195>, 1998.
- Algeo, T. J., Berner, R. A., Maynard, J. B., and Scheckl: Late Devonian oceanic anoxic events and biotic crises: “rooted” in the evolution of vascular land plants?, GSA Today, 5, 45–66, 1995.



- 740 Averbuch, O., Tribovillard, N., Devleeschouwer, X., Riquier, L., Mistiaen, B., and Van Vliet-Lanoe, B.: Mountain building-enhanced continental weathering and organic carbon burial as major causes for climatic cooling at the Frasnian-Famennian boundary (c. 376 Ma)?, *Terra Nova*, 17, 25–34, <https://doi.org/10.1111/j.1365-3121.2004.00580.x>, 2005.
- Bambach, R. K.: PHANEROZOIC BIODIVERSITY MASS EXTINCTIONS, *Annu. Rev. Earth Planet. Sci.*, 34, 127–155, <https://doi.org/10.1146/annurev.earth.33.092203.122654>, 2006.
- 745 Batenburg, S. J., De Vleeschouwer, D., Sprovieri, M., Hilgen, F. J., Gale, A. S., Singer, B. S., Koeberl, C., Coccioni, R., Claeys, P., and Montanari, A.: Orbital control on the timing of oceanic anoxia in the Late Cretaceous., *Climate of the Past*, 12, 1995–2009, <https://doi.org/10.5194/cp-12-1995-2016>, 2016.
- Becker, R. T.: Die Geologie des Gebietes nördlich von Adorf zwischen Rhenetal und R 3487 (MBL 4618 Adorf). Unveröffentlichte Diplom-Kartierung., Ruhr-University Bochum, Bochum, 68 pp., 1984.
- 750 Becker, R. T.: Stratigraphische Gliederung und Ammonoiten-Faunen im Nehdenium (Oberdevon II) von Europa und Nord-Afrika, *Courier Forschungsinstitut Senckenberg*, 155, 1–405, 1993.
- Becker, R. T. and House, M. R.: Kellwasser Events and goniatite successions in the Devonian of the Montagne Noire with comments on possible causations., *Courier Forschungsinstitut Senckenberg*, 169, 45–77, 1994.
- Becker, R. T., Aboussalam, Z. S., Hartenfels, S., Nowak, H., Juch, D., and Drozdowski, G.: Drowning and sedimentary cover of Velbert Anticline reef complexes (northwestern Rhenish Massif)., *Münster. Forsch. Geol. Paläont.*, 108, 76–101, 2016a.
- Becker, R. T., Piecha, M., Gereke, M., and Spellbrink, K.: The Frasnian/Famennian boundary in shelf basin facies north of Diemelsee-Adorf., *Münstersche Forschungen zur Fortschritt Geologie und Paläontologie*, 108, 220–231, 2016b.
- Becker, R. T., Marshall, J. E. A., Da Silva, A. C., Agterberg, F. P., Gradstein, F. M., and Ogg, J. G.: Chapter 22 - The Devonian Period., in: *Geologic Time Scale 2020*, edited by: Gradstein, F. M., Ogg, J. G., Schmitz, M. D., and Ogg, G. M., vol. 2, Elsevier, 733–810, 2020.
- 760 Berger, A., Loutre, M. F., and Laskar, J.: Stability of the astronomical frequencies over the Earth's history for paleoclimate studies., *Science*, 255, 560–566, <https://doi.org/10.1126/science.255.5044.560>, 1992.
- Berner, R. A.: Weathering, plants, and the long-term carbon cycle, *Geochimica et Cosmochimica Acta*, 56, 3225–3231, [https://doi.org/10.1016/0016-7037\(92\)90300-8](https://doi.org/10.1016/0016-7037(92)90300-8), 1992.
- 765 Blakey, R. C.: *Global Paleogeography*, 2016.
- Bond, D., Wignall, P. B., and Racki, G.: Extent and duration of marine anoxia during the Frasnian–Famennian (Late Devonian) mass extinction in Poland, Germany, Austria and France., *Geological Magazine*, 141, 173–193, <https://doi.org/10.1017/S0016756804008866>, 2004.
- Bond, D. P. G. and Wignall, P. B.: The role of sea-level change and marine anoxia in the Frasnian–Famennian (Late Devonian) mass extinction, *Palaeogeography, Palaeoclimatology, Palaeoecology*, 263, 107–118, <https://doi.org/10.1016/j.palaeo.2008.02.015>, 2008.
- 770 Boucot, A. J., Xu, C., Scotese, C. R., and Morley, R. J.: *Phanerozoic Paleoclimate: An Atlas of Lithologic Indicators of Climate*, SEPM (Society for Sedimentary Geology), Tulsa, Oklahoma, U.S.A., <https://doi.org/10.2110/sepmcsp.11>, 2013.





- 775 Boyce, C. K. and Lee, J.-E.: Plant Evolution and Climate Over Geological Timescales, *Annu. Rev. Earth Planet. Sci.*, 45, 61–87, <https://doi.org/10.1146/annurev-earth-063016-015629>, 2017.
- Boyce, C. K., Ibarra, D. E., Nelsen, M. P., and D’Antonio, M. P.: Nitrogen-based symbioses, phosphorus availability, and accounting for a modern world more productive than the Paleozoic, *Geobiology*, 21, 86–101, <https://doi.org/10.1111/gbi.12519>, 2023a.
- 780 Boyce, C. K., Ibarra, D. E., and D’Antonio, M. P.: What we talk about when we talk about the long-term carbon cycle, *New Phytologist*, 237, 1550–1557, <https://doi.org/10.1111/nph.18665>, 2023b.
- Brugger, J., Hofmann, M., Petri, S., and Feulner, G.: On the Sensitivity of the Devonian Climate to Continental Configuration, Vegetation Cover, Orbital Configuration, CO<sub>2</sub> Concentration, and Insolation, *Paleoceanography and Paleoclimatology*, 34, 1375–1398, <https://doi.org/10.1029/2019PA003562>, 2019.
- 785 Buendía, C., Arens, S., Hickler, T., Higgins, S. I., Porada, P., and Kleidon, A.: On the potential vegetation feedbacks that enhance phosphorus availability – insights from a process-based model linking geological and ecological timescales, *Biogeosciences*, 11, 3661–3683, <https://doi.org/10.5194/bg-11-3661-2014>, 2014.
- Buggisch, W.: The global Frasnian-Famennian »Kellwasser Event«, *Geol Rundsch*, 80, 49–72, <https://doi.org/10.1007/BF01828767>, 1991.
- 790 Buggisch, W. and Joachimski, M. M.: Carbon isotope stratigraphy of the Devonian of Central and Southern Europe, *Palaeogeography, Palaeoclimatology, Palaeoecology*, 240, 68–88, <https://doi.org/10.1016/j.palaeo.2006.03.046>, 2006.
- Butler, B. and Hillier, S.: powdR: An R package for quantitative mineralogy using full pattern summation of X-ray powder diffraction data, Preprint submitted to *Computers and Geosciences*, 33, <https://doi.org/10.1016/j.cageo.2020.104662>, 2020.
- Calvert, S. E. and Pedersen, T. F.: Chapter fourteen elemental proxies for palaeoclimatic and palaeoceanographic variability in marine sediments: interpretation and application., in: *Developments in Marine Geology*, vol. 1, Elsevier, 567–644, 2007.
- 795 Cao, W., Williams, S., Flament, N., Zahirovic, S., Scotese, C., and Müller, R. D.: Palaeolatitudinal distribution of lithologic indicators of climate in a palaeogeographic framework, *Geol. Mag.*, 156, 331–354, <https://doi.org/10.1017/S0016756818000110>, 2019.
- 800 Carmichael, S. K., Waters, J. A., Suttner, T. J., Kido, E., and DeReuil, A. A.: A new model for the Kellwasser Anoxia Events (Late Devonian): Shallow water anoxia in an open oceanic setting in the Central Asian Orogenic Belt, *Palaeogeography, Palaeoclimatology, Palaeoecology*, 399, 394–403, <https://doi.org/10.1016/j.palaeo.2014.02.016>, 2014.
- Carmichael, S. K., Waters, J. A., Königshof, P., Suttner, T. J., and Kido, E.: Paleogeography and paleoenvironments of the Late Devonian Kellwasser event: A review of its sedimentological and geochemical expression, *Global and Planetary Change*, 183, 102984, <https://doi.org/10.1016/j.gloplacha.2019.102984>, 2019.
- 805 Chadwick, O. A., Derry, L. A., Vitousek, P. M., Huebert, B. J., and Hedin, L. O.: Changing sources of nutrients during four million years of ecosystem development, *Nature*, 397, 491–497, <https://doi.org/10.1038/17276>, 1999.
- Chen, D. and Tucker, M. E.: The Frasnian–Famennian mass extinction: insights from high-resolution sequence stratigraphy and cyclostratigraphy in South China., *Palaeogeography, Palaeoclimatology, Palaeoecology*, 193, 87–111, [https://doi.org/10.1016/S0031-0182\(02\)00716-2](https://doi.org/10.1016/S0031-0182(02)00716-2), 2003.



- 810 Claisse, F. and Samson, C.: Heterogeneity Effects in X-Ray Analysis, *Adv. x-ray anal.*, 5, 335–354, <https://doi.org/10.1154/S0376030800001671>, 1961.
- Clark, J. W. and Donoghue, P. C. J.: Constraining the timing of whole genome duplication in plant evolutionary history, *Proc. R. Soc. B.*, 284, 20170912, <https://doi.org/10.1098/rspb.2017.0912>, 2017.
- Clift, P. D., Hodges, K. V., Heslop, D., Hannigan, R., Van Long, H., and Calves, G.: Correlation of Himalayan exhumation rates and Asian monsoon intensity, *Nature Geosci.*, 1, 875–880, <https://doi.org/10.1038/ngeo351>, 2008.
- 815 Clift, P. D., Wan, S., and Blusztajn, J.: Reconstructing chemical weathering, physical erosion and monsoon intensity since 25Ma in the northern South China Sea: A review of competing proxies, *Earth-Science Reviews*, 130, 86–102, <https://doi.org/10.1016/j.earscirev.2014.01.002>, 2014.
- Copper, P.: Frasnian/Famennian mass extinction and cold-water oceans, *Geol*, 14, 835, [https://doi.org/10.1130/0091-7613\(1986\)14<835:FMEACO>2.0.CO;2](https://doi.org/10.1130/0091-7613(1986)14<835:FMEACO>2.0.CO;2), 1986.
- 820 Correns, C. W.: Die Sedimentgesteine, in: *Die Entstehung der Gesteine*, edited by: Barth, T. F. W., Correns, C. W., and Eskola, P., Springer Berlin Heidelberg, Berlin, Heidelberg, 116–262, [https://doi.org/10.1007/978-3-642-86244-1\\_2](https://doi.org/10.1007/978-3-642-86244-1_2), 1939.
- Cramer, B. D. and Jarvis, I.: Carbon Isotope Stratigraphy, in: *Geologic Time Scale 2020*, Elsevier, 309–343, <https://doi.org/10.1016/B978-0-12-824360-2.00011-5>, 2020.
- 825 Cressler, W. L., Prestianni, C., and LePage, B. A.: Late Devonian spermatophyte diversity and paleoecology at Red Hill, north-central Pennsylvania, USA, *International Journal of Coal Geology*, 83, 91–102, <https://doi.org/10.1016/j.coal.2009.10.002>, 2010.
- Da Silva, A.-C., Sinnesael, M., Claeys, P., Davies, J. H. F. L., de Winter, N. J., Percival, L. M. E., Schaltegger, U., and De Vleeschouwer, D.: Anchoring the Late Devonian mass extinction in absolute time by integrating climatic controls and radioisotopic dating., *Scientific reports*, 10, 1–12, <https://doi.org/10.1038/s41598-020-69097-6>, 2020.
- 830 Dahl, T. W., Ruhl, M., Hammarlund, E. U., Canfield, D. E., Rosing, M. T., and Bjerrum, C. J.: Tracing euxinia by molybdenum concentrations in sediments using handheld X-ray fluorescence spectroscopy (HHXRF), *Chemical Geology*, 360–361, 241–251, <http://dx.doi.org/10.1016/j.chemgeo.2013.10.022>, 2013.
- D’Antonio, M. P., Ibarra, D. E., and Boyce, C. K.: Land plant evolution decreased, rather than increased, weathering rates, *Geology*, 48, 29–33, <https://doi.org/10.1130/G46776.1>, 2020.
- 835 D’Antonio, M. P., Ibarra, D. E., and Boyce, C. K.: The preservation of cause and effect in the rock record, *Paleobiology*, 1–11, <https://doi.org/10.1017/pab.2022.33>, 2022.
- Davies, A., Gréselle, B., Hunter, S. J., Baines, G., Robson, C., Haywood, A. M., Ray, D. C., Simmons, M. D., and Van Buchem, F. S. P.: Assessing the impact of aquifer-eustasy on short-term Cretaceous sea-level, *Cretaceous Research*, 112, 104445, <https://doi.org/10.1016/j.cretres.2020.104445>, 2020.
- 840 De Vleeschouwer, D., Crucifix, M., Bounceur, N., and Claeys, P.: The impact of astronomical forcing on the Late Devonian greenhouse climate, *Global and Planetary Change*, 20, 65–80, <http://dx.doi.org/10.1016/j.gloplacha.2014.06.002>, 2014.
- De Vleeschouwer, D., Da Silva, A.-C., Sinnesael, M., Chen, D., Day, J. E., Whalen, M. T., Guo, Z., and Claeys, P.: Timing and pacing of the Late Devonian mass extinction event regulated by eccentricity and obliquity, *Nature communications*, 8, 2268, <https://doi.org/10.1038/s41467-017-02407-1>, 2017.



- 845 Devleeschouwer, X., Herbosch, A., and Pr at, A.: Microfacies, sequence stratigraphy and clay mineralogy of a condensed deep-water section around the Frasnian/Famennian boundary (Steinbruch Schmidt, Germany), *Palaeogeography, Palaeoclimatology, Palaeoecology*, 181, 171–193, [https://doi.org/10.1016/S0031-0182\(01\)00478-3](https://doi.org/10.1016/S0031-0182(01)00478-3), 2002.
- Driese, S. G. and Mora, C. I.: 13. Diversification of Siluro-Devonian Plant Traces in Paleosols and Influence on Estimates of Paleatmospheric CO<sub>2</sub> Levels, in: *Plants Invade the Land*, edited by: Gensel, P. G. and Edwards, D., Columbia University Press, 237–254, <https://doi.org/10.7312/gens11160-014>, 2001.
- 850 Eder, W., Engel, W., and Franke, W.: *Pal ogeographie an der Wende Mittel-/Oberdevon (Faziesübergang Schelf/Becken am Beispiel von Briloner Massenkalk, Padberger Kalk und Flinz; Aufschl sse 4 bis 6)*, Geotagung `77 G ttingen, Exkursions-F hrer I, 22–29, 1977.
- Filippelli, G. M.: The Global Phosphorus Cycle: Past, Present, and Future, *Elements*, 4, 89–95, 855 <https://doi.org/10.2113/GSELEMENTS.4.2.89>, 2008.
- Filippelli, G. M. and Souch, C.: Effects of climate and landscape development on the terrestrial phosphorus cycle, *Geol*, 27, 171, [https://doi.org/10.1130/0091-7613\(1999\)027<0171:EOCALD>2.3.CO;2](https://doi.org/10.1130/0091-7613(1999)027<0171:EOCALD>2.3.CO;2), 1999.
- Franke, W.: Devon und Unterkarbon des Waldecker Landes-Ein Pal ogeographischer Querschnitt (Exkursion C am 4. April 1991)., *Jahresberichte und Mitteilungen des Oberrheinischen Geologischen Vereins, Neue Folge*, 73, 57–78, 1991.
- 860 Franke, W., Meischner, D., and Oncken, O.: *Geologie eines passiven Plattenrandes: Devon und Karbon im Rechtsrheinischen Schiefergebirge.*, Exkursion der Geologischen Vereinigung, Nr 3, Gießen, G ttingen, Potsdam, 74 pp., 1996.
- Genise, J. F., Bedatou, E., Bellosi, E. S., Sarzetti, L. C., S nchez, M. V., and Krause, J. M.: The Phanerozoic Four Revolutions and Evolution of Paleosol Ichnofacies, in: *The Trace-Fossil Record of Major Evolutionary Events*, vol. 40, edited by: M ngano, M. G. and Buatois, L. A., Springer Netherlands, Dordrecht, 301–370, [https://doi.org/10.1007/978-94-017-9597-5\\_6](https://doi.org/10.1007/978-94-017-9597-5_6), 2016.
- 865 Gereke, M.: Die oberdevonische Kellwasser-Krise in der Beckenfazies von Rhenohercynikum und Saxothuringikum (sp tes Frasnium, fr hestes Famennium, Deutschland)., *K lner Forum Geol. Pal ont.*, 17, 1–199, 2007.
- Gereke, M. and Schindler, E.: “Time-Specific Facies” and biological crises — The Kellwasser Event interval near the Frasnian/Famennian boundary (Late Devonian), *Palaeogeography, Palaeoclimatology, Palaeoecology*, 367–368, 19–29, <https://doi.org/10.1016/j.palaeo.2011.11.024>, 2012.
- 870 Gibling, M. R. and Davies, N. S.: Palaeozoic landscapes shaped by plant evolution, *Nature Geosci*, 5, 99–105, <https://doi.org/10.1038/ngeo1376>, 2012.
- Gillespie, W. H., Rothwell, G. W., and Scheckler, S. E.: The earliest seeds, *Nature*, 293, 462–464, <https://doi.org/10.1038/293462a0>, 1981.
- Gong, Y.-M., Li, B.-H., Wang, C.-Y., and Wu, Y.: Orbital cyclostratigraphy of the Devonian Frasnian–Famennian transition in South China, *Palaeogeography, Palaeoclimatology, Palaeoecology*, 168, 237–248, [https://doi.org/10.1016/S0031-0182\(00\)00257-1](https://doi.org/10.1016/S0031-0182(00)00257-1), 2001.
- 875 Gouhier, T. C., Grinsted, A., and Simko, V.: R package biwavelet: Conduct Univariate and Bivariate Wavelet Analyses. (Version 0.20.21), 2021.
- Griffin, J. J., Windom, H., and Goldberg, E. D.: The distribution of clay minerals in the World Ocean, *Deep Sea Research and Oceanographic Abstracts*, 15, 433–459, [https://doi.org/10.1016/0011-7471\(68\)90051-X](https://doi.org/10.1016/0011-7471(68)90051-X), 1968.
- 880



- Hartenfels, S., Becker, R. T., and Aboussalam, Z. S.: Givetian to Famennian stratigraphy, Kellwasser, Annulata and other events at Beringhauser Tunnel (Messinghausen Anticline, eastern Rhenish Massif), *Münstersche Forschungen zur Geologie und Paläontologie*, 108, 196–219, 2016.
- 885 Hartkopf-Fröder, C., Kloppisch, M., Mann, U., Neumann-Mahlkau, P., Schaefer, R. G., and Wilkes, H.: The end-Frasnian mass extinction in the Eifel Mountains, Germany: new insights from organic matter composition and preservation. in: *Devonian Events and Correlation*, edited by: Becker, R.T., and Kirchgasser, W. T., Geological Society, London, Special Publications, 278, 173–196, <https://doi.org/10.1144/SP278.8>, 2007.
- House, M. R., Becker, R. T., Feist, R., Flajs, G., Girard, C., and Klapper, G.: The Frasnian/Famennian boundary GSSP at Coumiac, Southern France, *Courier Forschungsinstitut Senckenberg*, 225, 59–75, 2000.
- 890 Hu, D., Clift, P. D., Wan, S., Böning, P., Hannigan, R., Hillier, S., and Blusztajn, J.: Testing chemical weathering proxies in Miocene–Recent fluvial-derived sediments in the South China Sea, *SP*, 429, 45–72, <https://doi.org/10.1144/SP429.5>, 2016.
- Huang, C., Joachimski, M. M., and Gong, Y.: Did climate changes trigger the Late Devonian Kellwasser Crisis? Evidence from a high-resolution conodont  $\delta^{18}\text{O}$  PO 4 record from South China, *Earth and Planetary Science Letters*, 495, 174–184, <https://doi.org/10.1016/j.epsl.2018.05.016>, 2018.
- 895 van Hulten, F. F. N.: Devono-carboniferous carbonate platform systems of the Netherlands, *Geologica Belgica*, 15, 284–296, 2012.
- Ibarra, D. E., Rugenstein, J. K. C., Bachan, A., Baresch, A., Lau, K. V., Thomas, D. L., Lee, J.-E., Boyce, C. K., and Chamberlain, C. P.: Modeling the consequences of land plant evolution on silicate weathering, *Am J Sci*, 319, 1–43, <https://doi.org/10.2475/01.2019.01>, 2019.
- 900 Jenkyns, H. C.: Geochemistry of oceanic anoxic events., *Geochemistry, Geophysics, Geosystems*, 11, Q03004, <https://doi.org/10.1029/2009GC002788>, 2010.
- Joachimski, M. M.: Comparison of organic and inorganic carbon isotope patterns across the Frasnian–Famennian boundary, *Palaeogeography, Palaeoclimatology, Palaeoecology*, 132, 133–145, [https://doi.org/10.1016/S0031-0182\(97\)00051-5](https://doi.org/10.1016/S0031-0182(97)00051-5), 1997.
- Joachimski, M. M. and Buggisch, W.: Anoxic events in the late Frasnian—Causes of the Frasnian-Famennian faunal crisis?, *Geology*, 21, 675–678, [https://doi.org/10.1130/0091-7613\(1993\)021<0675:AEITLF>2.3.CO;2](https://doi.org/10.1130/0091-7613(1993)021<0675:AEITLF>2.3.CO;2), 1993.
- Joachimski, M. M. and Buggisch, W.: Conodont apatite  $\delta^{18}\text{O}$  signatures indicate climatic cooling as a trigger of the Late Devonian mass extinction, *Geol*, 30, 711, [https://doi.org/10.1130/0091-7613\(2002\)030<0711:CAOSIC>2.0.CO;2](https://doi.org/10.1130/0091-7613(2002)030<0711:CAOSIC>2.0.CO;2), 2002.
- Joachimski, M. M., Ostertag-Henning, C., Pancost, R. D., Strauss, H., Freeman, K. H., Littke, R., Sinninghe Damsté, J. S., and Racki, G.: Water column anoxia, enhanced productivity and concomitant changes in  $\delta^{13}\text{C}$  and  $\delta^{34}\text{S}$  across the Frasnian–Famennian boundary (Kowala—Holy Cross Mountains/Poland), *Chemical Geology*, 175, 109–131, [https://doi.org/10.1016/S0009-2541\(00\)00365-X](https://doi.org/10.1016/S0009-2541(00)00365-X), 2001.
- Joachimski, M. M., Pancost, R. D., Freeman, K. H., Ostertag-Henning, C., and Buggisch, W.: Carbon isotope geochemistry of the Frasnian–Famennian transition., *Palaeogeography, Palaeoclimatology, Palaeoecology*, 181, 91–109, [https://doi.org/10.1016/S0031-0182\(01\)00474-6](https://doi.org/10.1016/S0031-0182(01)00474-6), 2002.
- 915 Johnson, J. G., Klapper, G., and Sandberg, C. A.: Devonian eustatic fluctuations in Euramerica, *Geol Soc America Bull*, 96, 567, [https://doi.org/10.1130/0016-7606\(1985\)96<567:DEFIE>2.0.CO;2](https://doi.org/10.1130/0016-7606(1985)96<567:DEFIE>2.0.CO;2), 1985.



- Jutras, P., Quillan, R. S., and LeForte, M. J.: Evidence from Middle Ordovician paleosols for the predominance of alkaline groundwater at the dawn of land plant radiation, *Geology*, 37, 91–94, <https://doi.org/10.1130/G25447A.1>, 2009.
- 920 Kabanov, P., Hauck, T. E., Gouwy, S. A., Grasby, S. E., and van der Boon, A.: Oceanic anoxic events, marine photic-zone euxinia, and controversy of sea-level fluctuations during the Middle-Late Devonian, *Earth-Science Reviews*, 104415, <https://doi.org/10.1016/j.earscirev.2023.104415>, 2023.
- Kaiho, K., Yatsu, S., Oba, M., Gorjan, P., Casier, J.-G., and Ikeda, M.: A forest fire and soil erosion event during the Late Devonian mass extinction, *Palaeogeography, Palaeoclimatology, Palaeoecology*, 392, 272–280, <https://doi.org/10.1016/j.palaeo.2013.09.008>, 2013.
- 925 Kaiho, K., Miura, M., Tezuka, M., Hayashi, N., Jones, D. S., Oikawa, K., Casier, J.-G., Fujibayashi, M., and Chen, Z.-Q.: Coronene, mercury, and biomarker data support a link between extinction magnitude and volcanic intensity in the Late Devonian, *Global and Planetary Change*, 199, 103452, <https://doi.org/10.1016/j.gloplacha.2021.103452>, 2021.
- Kaiser, S. I., Aretz, M., and Becker, R. T.: The global Hangenberg Crisis (Devonian–Carboniferous transition): review of a first-order mass extinction, in: *Devonian Climate, Sea Level and Evolutionary Events*, edited by: Becker, R. T., Königshof, P., and Brett, C. E., Geological Society, London, Special Publications, 423, 387–437, <https://doi.org/10.1144/SP423.9>, 2016.
- 930 Kemp, D. B.: Optimizing significance testing of astronomical forcing in cyclostratigraphy., *Paleoceanography*, 31, 1516–1531, <https://doi.org/10.1002/2016PA002963>, 2016.
- Königshof, P.: Der Farbänderungsindex von Conodonten (CAI) in paläozoischen Gesteinen (Mitteldevon bis Unterkarbon) des Rheinischen Schiefergebirges - Eine Ergänzung zur Vitritreflexion., *Courier Forschungsinstitut Senckenberg, Frankfurt/Main*, 118 pp., 1992.
- 935 Krencker, F.-N., Lindström, S., and Bodin, S.: A major sea-level drop briefly precedes the Toarcian oceanic anoxic event: implication for Early Jurassic climate and carbon cycle, *Sci Rep*, 9, 12518, <https://doi.org/10.1038/s41598-019-48956-x>, 2019.
- Kump, L. R. and Arthur, M. A.: Interpreting carbon-isotope excursions: carbonates and organic matter, *Chemical Geology*, 161, 181–198, [https://doi.org/10.1016/S0009-2541\(99\)00086-8](https://doi.org/10.1016/S0009-2541(99)00086-8), 1999.
- 940 Lash, G. G.: A multiproxy analysis of the Frasnian-Famennian transition in western New York State, U.S.A, *Palaeogeography, Palaeoclimatology, Palaeoecology*, 473, 108–122, <https://doi.org/10.1016/j.palaeo.2017.02.032>, 2017.
- Le Houedec, S., Girard, C., and Balter, V.: Conodont Sr/Ca and  $\delta^{18}\text{O}$  record seawater changes at the Frasnian–Famennian boundary, *Palaeogeography, Palaeoclimatology, Palaeoecology*, 376, 114–121, <https://doi.org/10.1016/j.palaeo.2013.02.025>, 2013.
- 945 Lenton, T. M., Crouch, M., Johnson, M., Pires, N., and Dolan, L.: First plants cooled the Ordovician, *Nature Geosci*, 5, 86–89, <https://doi.org/10.1038/ngeo1390>, 2012.
- Li, C., Yang, S., Zhao, J., Dosseto, A., Bi, L., and Clark, T. R.: The time scale of river sediment source-to-sink processes in East Asia, *Chemical Geology*, 446, 138–146, <https://doi.org/10.1016/j.chemgeo.2016.06.012>, 2016.
- 950 Liu, Z., Percival, L. M. E., Vandeputte, D., Selby, D., Claeys, P., Over, D. J., and Gao, Y.: Upper Devonian mercury record from North America and its implications for the Frasnian–Famennian mass extinction, *Palaeogeography, Palaeoclimatology, Palaeoecology*, 576, 110502, <https://doi.org/10.1016/j.palaeo.2021.110502>, 2021.



- Lourens, L. J., Hilgen, F. J., Gudjonsson, L., and Zachariasse, W. J.: Late Pliocene to early Pleistocene astronomically forced sea surface productivity and temperature variations in the Mediterranean, *Marine Micropaleontology*, 19, 49–78, [https://doi.org/10.1016/0377-8398\(92\)90021-B](https://doi.org/10.1016/0377-8398(92)90021-B), 1992.
- 955 Lu, M., Lu, Y., Ikejiri, T., Sun, D., Carroll, R., Blair, E. H., Algeo, T. J., and Sun, Y.: Periodic oceanic euxinia and terrestrial fluxes linked to astronomical forcing during the Late Devonian Frasnian–Famennian mass extinction, *Earth and Planetary Science Letters*, 562, 116839, <https://doi.org/10.1016/j.epsl.2021.116839>, 2021.
- Ma, K., Hinnov, L., Zhang, X., and Gong, Y.: Astronomical climate changes trigger Late Devonian bio- and environmental events in South China, *Global and Planetary Change*, 215, 103874, <https://doi.org/10.1016/j.gloplacha.2022.103874>, 2022.
- 960 Ma, X., Gong, Y., Chen, D., Racki, G., Chen, X., and Liao, W.: The Late Devonian Frasnian–Famennian Event in South China — Patterns and causes of extinctions, sea level changes, and isotope variations, *Palaeogeography, Palaeoclimatology, Palaeoecology*, 448, 224–244, <https://doi.org/10.1016/j.palaeo.2015.10.047>, 2016.
- McGhee, G. R.: Extinction: Late Devonian Mass Extinction, in: *Encyclopedia of Life Sciences (eLS)*, edited by: John Wiley & Sons, Ltd, Wiley, Chichester, <https://doi.org/10.1002/9780470015902.a0001653.pub3>, 2012.
- 965 McGhee, G. R. and Racki, G.: Extinction: Late Devonian Mass Extinction, in: *eLS*, edited by: John Wiley & Sons, Ltd, Wiley, 1–8, <https://doi.org/10.1002/9780470015902.a0029301>, 2021.
- McGhee, G. R., Clapham, M. E., Sheehan, P. M., Bottjer, D. J., and Droser, M. L.: A new ecological-severity ranking of major Phanerozoic biodiversity crises, *Palaeogeography, Palaeoclimatology, Palaeoecology*, 370, 260–270, <https://doi.org/10.1016/j.palaeo.2012.12.019>, 2013.
- 970 McGregor, H. V., Dupont, L., Stuut, J.-B. W., and Kuhlmann, H.: Vegetation change, goats, and religion: a 2000-year history of land use in southern Morocco, *Quaternary Science Reviews*, 28, 1434–1448, <https://doi.org/10.1016/j.quascirev.2009.02.012>, 2009.
- McLaren, D. J.: Mass Extinctions Are Rapid Events, *Palaios*, 11, 409, <https://doi.org/10.2307/3515208>, 1996.
- van der Meer, D. G., Scotese, C. R., Mills, B. J. W., Sluijs, A., van den Berg van Saparoea, A.-P., and van de Weg, R. M. B.: Long-term Phanerozoic global mean sea level: Insights from strontium isotope variations and estimates of continental glaciation, *Gondwana Research*, 111, 103–121, <https://doi.org/10.1016/j.gr.2022.07.014>, 2022.
- Meischner, D.: Clastic sedimentation in the Variscan Geosyncline east of the River Rhine., in: *Sedimentology of Parts of Central Europe.*, International Sedimentological Congress, 9–43, 1971.
- Meyers, S. R.: *Astrochron: An R Package for Astrochronology.*, 2014.
- 980 Meyers, S. R.: The evaluation of eccentricity-related amplitude modulation and bundling in paleoclimate data: An inverse approach for astrochronologic testing and time scale optimization., *Paleoceanography*, 30, 1625–1640, <https://doi.org/10.1002/2015PA002850>, 2015.
- Mitchell, R. L., Kenrick, P., Pressel, S., Duckett, J., Strullu-Derrien, C., Davies, N., McMahon, W. J., and Summerfield, R.: Terrestrial surface stabilisation by modern analogues of the earliest land plants: A multi-dimensional imaging study, *Geobiology*, 21, 454–473, <https://doi.org/10.1111/gbi.12546>, 2023.
- 985 Mottequin, B. and Poty, E.: Kellwasser horizons, sea-level changes and brachiopod–coral crises during the late Frasnian in the Namur–Dinant Basin (southern Belgium): a synopsis, in: *Devonian Climate, Sea Level and Evolutionary Events*, edited by



- Becker, R. T., Königshof, P., and Brett, C. E., Geological Society, London, Special Publications, 423, 235–250, <https://doi.org/10.1144/SP423.6>, 2016.
- 990 Munnecke, A. and Samtleben, C.: The formation of micritic limestones and the development of limestone-marl alternations in the Silurian of Gotland, Sweden, *Facies*, 34, 159–176, <https://doi.org/10.1007/BF02546162>, 1996.
- Nesbitt, H. W., Markovics, G., and price, R. C.: Chemical processes affecting alkalis and alkaline earths during continental weathering, *Geochimica et Cosmochimica Acta*, 44, 1659–1666, [https://doi.org/10.1016/0016-7037\(80\)90218-5](https://doi.org/10.1016/0016-7037(80)90218-5), 1980.
- 995 Nohl, T., Wetterich, J., Fobbe, N., and Munnecke, A.: Lithological dependence of aragonite preservation in monospecific gastropod deposits of the Miocene Mainz Basin: Implications for the (dia-)genesis of limestone–marl alternations, *Journal of Sedimentary Research*, 90, 1500–1509, <https://doi.org/10.2110/jsr.2020.057>, 2020.
- Nohl, T., Steinbauer, M. J., Sinnesael, M., and Jarochowska, E.: Detecting initial aragonite and calcite variations in limestone–marl alternations, *Sedimentology*, 68, 3102–3115, <https://doi.org/10.1111/sed.12885>, 2021.
- 1000 Pas, D., Da Silva, A.-C., Cornet, P., Bultynck, P., Königshof, P., and Boulvain, F.: Sedimentary development of a continuous Middle Devonian to Mississippian section from the fore-reef fringe of the Brilon Reef Complex (Rheinisches Schiefergebirge, Germany), *Facies*, 59, 969–990, <https://doi.org/10.1007/s10347-012-0351-z>, 2013.
- Percival, L. M. E., Davies, J. H. F. L., Schaltegger, U., De Vleeschouwer, D., Da Silva, A. C., and Föllmi, K. B.: Precisely dating the Frasnian–Famennian boundary: implications for the cause of the Late Devonian mass extinction., *Scientific reports*, 8, 1–10, <https://doi.org/10.1038/s41598-018-27847-7>, 2018.
- 1005 Percival, L. M. E., Selby, D., Bond, D. P. G., Rakociński, M., Racki, G., Marynowski, L., Adatte, T., Spangenberg, J. E., and Föllmi, K. B.: Pulses of enhanced continental weathering associated with multiple Late Devonian climate perturbations: Evidence from osmium-isotope compositions, *Palaeogeography, Palaeoclimatology, Palaeoecology*, 524, 240–249, <https://doi.org/10.1016/j.palaeo.2019.03.036>, 2019.
- 1010 Percival, L. M. E., Bond, D. P. G., Rakociński, M., Marynowski, L., Hood, A. v. S., Adatte, T., Spangenberg, J. E., and Föllmi, K. B.: Phosphorus-cycle disturbances during the Late Devonian anoxic events, *Global and Planetary Change*, 184, 103070, <https://doi.org/10.1016/j.gloplacha.2019.103070>, 2020.
- Piecha, M.: Stratigraphie, Fazies und Sedimentpetrographie der-rhythmisch und zyklisch abgelagerten, tiefoberdevonischen-Beckensedimente im Rechtsrheinischen Schiefergebirg (Adorf-Bänderschiefer)., *Courier Forschungsinstitut Senckenberg*, 1–151 pp., 1993.
- 1015 Pier, J. Q., Brisson, S. K., Beard, J. A., Hren, M. T., and Bush, A. M.: Accelerated mass extinction in an isolated biota during Late Devonian climate changes, *Sci Rep*, 11, 24366, <https://doi.org/10.1038/s41598-021-03510-6>, 2021.
- Pisarzowska, A. and Racki, G.: Isotopic chemostratigraphy across the Early–Middle Frasnian transition (Late Devonian) on the South Polish carbonate shelf: A reference for the global punctata Event, *Chemical Geology*, 334, 199–220, <https://doi.org/10.1016/j.chemgeo.2012.10.034>, 2012.
- 1020 Pujol, F., Berner, Z., and Stüben, D.: Palaeoenvironmental changes at the Frasnian/Famennian boundary in key European sections: Chemostratigraphic constraints, *Palaeogeography, Palaeoclimatology, Palaeoecology*, 240, 120–145, <https://doi.org/10.1016/j.palaeo.2006.03.055>, 2006.



- 1025 Qie, W., Zhang, J., Luo, G., Algeo, T. J., Chen, B., Xiang, L., Liang, K., Liu, X., Pogge Von Strandmann, P. A. E., Chen, J., and Wang, X.: Enhanced Continental Weathering as a Trigger for the End-Devonian Hangenberg Crisis, *Geophysical Research Letters*, 50, e2022GL102640, <https://doi.org/10.1029/2022GL102640>, 2023.
- Quye-Sawyer, J., Vandeginste, V., and Johnston, K. J.: Application of handheld energy-dispersive X-ray fluorescence spectrometry to carbonate studies: opportunities and challenges, *Journal of analytical atomic spectrometry*, 30, 1490–1499, <https://doi.org/10.1039/c5ja00114e>, 2015.
- 1030 Racki, G.: The Frasnian-Famennian biotic crisis: How many (if any) bolide impacts?, *Geologische Rundschau*, 87, 617–632, <https://doi.org/10.1007/s005310050235>, 1999.
- Racki, G.: Toward understanding Late Devonian global events: few answers, many questions., in: *Developments in Palaeontology and Stratigraphy.*, vol. 20, Elsevier, 5–36, 2005.
- Racki, G.: A volcanic scenario for the Frasnian–Famennian major biotic crisis and other Late Devonian global changes: More answers than questions?, *Global and Planetary Change*, 189, 103174, <https://doi.org/10.1016/j.gloplacha.2020.103174>, 2020.
- 1035 Racki, G., Rakociński, M., Marynowski, L., and Wignall, P. B.: Mercury enrichments and the Frasnian-Famennian biotic crisis: A volcanic trigger proved?, *Geology*, 46, 543–546, <https://doi.org/10.1130/G40233.1>, 2018.
- Raup, D. M. and Sepkoski, J. J.: Mass extinctions in the marine fossil record., *Science*, 215, 1501–1503, <https://doi.org/10.1126/science.215.4539.1501>, 1982.
- 1040 Riquier, L., Tribouvillard, N., Averbuch, O., Devleeschouwer, X., and Riboulleau, A.: The Late Frasnian Kellwasser horizons of the Harz Mountains (Germany): two oxygen-deficient periods resulting from different mechanisms., *Chemical Geology*, 233, 137–155, <https://doi.org/10.1016/j.chemgeo.2006.02.021>, 2006.
- Riquier, L., Averbuch, O., Tribouvillard, N., Albani, A. E., Lazreq, N., and Chakiri, S.: Environmental changes at the Frasnian–Famennian boundary in Central Morocco (Northern Gondwana): integrated rock-magnetic and geochemical studies, in: *Devonian Events and Correlations*, edited by: Becker, R. T., and Kirchgasser, W. T., Geological Society, London, Special Publications, 278, 197–217, <https://doi.org/10.1144/SP278.9>, 2007.
- 1045 Robert, C. and Chamley, H.: Cenozoic evolution of continental humidity and paleoenvironment, deduced from the kaolinite content of oceanic sediments, *Palaeogeography, Palaeoclimatology, Palaeoecology*, 60, 171–187, [https://doi.org/10.1016/0031-0182\(87\)90031-9](https://doi.org/10.1016/0031-0182(87)90031-9), 1987.
- 1050 Sageman, B. B., Murphy, A. E., Werne, J. P., Ver Straeten, C. A., Hollander, D. J., and Lyons, T. W.: A tale of shales: the relative roles of production, decomposition, and dilution in the accumulation of organic-rich strata, Middle–Upper Devonian, Appalachian basin, *Chemical Geology*, 195, 229–273, [https://doi.org/10.1016/S0009-2541\(02\)00397-2](https://doi.org/10.1016/S0009-2541(02)00397-2), 2003.
- Sames, B., Wagreich, M., Conrad, C. P., and Iqbal, S.: Aquifer-eustasy as the main driver of short-term sea-level fluctuations during Cretaceous hothouse climate phases, *SP*, 498, 9–38, <https://doi.org/10.1144/SP498-2019-105>, 2020.
- 1055 Schindler, E.: Die Kellwasser-Krise (hohe Frasn-Stufe, Ober-Devon)., *Göttinger Arbeiten zur Geologie und Paläontologie*, 46, 1–115, 1990a.
- Schindler, E.: The late Frasnian (Upper Devonian) Kellwasser Crisis., in: Kauffman E.G., Walliser O.H. (eds) *Extinction Events in Earth History.*, vol. 30, Springer, Berlin Heidelberg, 151–159, 1990b.





- 1060 Schindler, E. and Königshof, P.: Sedimentology and microfacies of Late Devonian Kellwasser limestones in relation to palaeobathymetry (Upper Kellwasser horizon, late Frasnian), *Zentral-blatt für Geologie und Paläontologie, Teil I, Stuttgart*, 597–607 pp., 1997.
- Schmitz, B., Feist, R., Meier, M. M. M., Martin, E., Heck, P. R., Lenaz, D., Topa, D., Busemann, H., Maden, C., Plant, A. A., and Terfelt, F.: The micrometeorite flux to Earth during the Frasnian–Famennian transition reconstructed in the Coumiac GSSP section, France., *Earth and Planetary Science Letters*, 522, 234–243, <https://doi.org/10.1016/j.epsl.2019.06.025>, 2019.
- 1065 Scotese, C. R.: An Atlas of Phanerozoic Paleogeographic Maps: The Seas Come In and the Seas Go Out, *Annu. Rev. Earth Planet. Sci.*, 49, 679–728, <https://doi.org/10.1146/annurev-earth-081320-064052>, 2021.
- Sepkoski, J. J.: Patterns of Phanerozoic Extinction: a Perspective from Global Data Bases, in: *Global Events and Event Stratigraphy in the Phanerozoic*, edited by: Walliser, O. H., Springer Berlin Heidelberg, Berlin, Heidelberg, 35–51, [https://doi.org/10.1007/978-3-642-79634-0\\_4](https://doi.org/10.1007/978-3-642-79634-0_4), 1996.
- 1070 Smart, M. S., Filippelli, G., Gilhooly III, W. P., Marshall, J. E. A., and Whiteside, J. H.: Enhanced terrestrial nutrient release during the Devonian emergence and expansion of forests: Evidence from lacustrine phosphorus and geochemical records, *GSA Bulletin*, <https://doi.org/10.1130/B36384.1>, 2022.
- Smith, W. O. and Demaster, D. J.: Phytoplankton biomass and productivity in the Amazon River plume: correlation with seasonal river discharge, *Continental Shelf Research*, 16, 291–319, [https://doi.org/10.1016/0278-4343\(95\)00007-N](https://doi.org/10.1016/0278-4343(95)00007-N), 1996.
- 1075 Song, H., Song, H., Algeo, T. J., Tong, J., Romaniello, S. J., Zhu, Y., Chu, D., Gong, Y., and Anbar, A. D.: Uranium and carbon isotopes document global-ocean redox-productivity relationships linked to cooling during the Frasnian-Famennian mass extinction, *Geology*, 45, 887–890, <https://doi.org/10.1130/G39393.1>, 2017.
- Southam, J. R., Peterson, W. H., and Brass, G. W.: Dynamics of anoxia, *Palaeogeography, Palaeoclimatology, Palaeoecology*, 40, 183–198, [https://doi.org/10.1016/0031-0182\(82\)90089-X](https://doi.org/10.1016/0031-0182(82)90089-X), 1982.
- Stritzke, R.: Die Karbonatsedimentation im Briloner Vorriffbereich, *Geologisches Jahrbuch*, 95, 253–315, 1990.
- 1080 Swart, P. K.: Global synchronous changes in the carbon isotopic composition of carbonate sediments unrelated to changes in the global carbon cycle, *Proc. Natl. Acad. Sci. U.S.A.*, 105, 13741–13745, <https://doi.org/10.1073/pnas.0802841105>, 2008.
- Thompson, J. B. and Newton, C. R.: Late Devonian mass extinction: episodic climatic cooling or warming?, *Canadian Society of Petroleum Geologists*, 14, 29–34, 1989.
- 1085 Thomson, D. J.: Spectrum estimation and harmonic analysis, *Proc. IEEE*, 70, 1055–1096, <https://doi.org/10.1109/PROC.1982.12433>, 1982.
- Trabucho-Alexandre, J., Hay, W. W., and de Boer, P. L.: Phanerozoic environments of black shale deposition and the Wilson Cycle, *Solid Earth*, 3, 29–42, <https://doi.org/10.5194/se-3-29-2012>, 2012.
- 1090 Tribouillard, N., Averbuch, O., Devleeschouwer, X., Racki, G., and Riboulleau, A.: Deep-water anoxia over the Frasnian-Famennian boundary (La Serre, France): a tectonically induced oceanic anoxic event?, *Terra Nova*, 16, 288–295, <https://doi.org/10.1111/j.1365-3121.2004.00562.x>, 2004.
- Vallner, Z., Kovács, E. B., Haas, J., Móricz, F., Ruhl, M., Zajzon, N., and Pálffy, J.: Preservation of orbital forcing in intraplatform carbonates and an astronomical time frame for a multiproxy record of end-Triassic global change from a western



- Tethyan section (Csővár, Hungary), *Palaeogeography, Palaeoclimatology, Palaeoecology*, 617, 111493, <https://doi.org/10.1016/j.palaeo.2023.111493>, 2023.
- 1095 Van Cappellen, P. and Ingall, E. D.: Redox Stabilization of the Atmosphere and Oceans by Phosphorus-Limited Marine Productivity, *Science*, 271, 493–496, <https://doi.org/10.1126/science.271.5248.493>, 1996.
- Veizer, J., Ala, D., Azmy, K., Bruckschen, P., Buhl, D., Bruhn, F., Carden, G. A. F., Diener, A., Ebner, S., Godderis, Y., Jasper, T., Korte, C., Pawellek, F., Podlaha, O. G., and Strauss, H.:  $^{87}\text{Sr}/^{86}\text{Sr}$ ,  $\delta^{13}\text{C}$  and  $\delta^{18}\text{O}$  evolution of Phanerozoic seawater, *Chemical Geology*, 161, 59–88, [https://doi.org/10.1016/S0009-2541\(99\)00081-9](https://doi.org/10.1016/S0009-2541(99)00081-9), 1999.
- 1100 Versteegh, G. J. M., Servais, T., Streng, M., Munnecke, A., and Vachard, D.: A DISCUSSION AND PROPOSAL CONCERNING THE USE OF THE TERM CALCISPHERES, *Palaeontology*, 52, 343–348, <https://doi.org/10.1111/j.1475-4983.2009.00854.x>, 2009.
- Vervoort, P., Kirtland Turner, S., Rochholz, F., and Ridgwell, A.: Earth System Model Analysis of How Astronomical Forcing Is Imprinted Onto the Marine Geological Record: The Role of the Inorganic (Carbonate) Carbon Cycle and Feedbacks, *Paleoceanogr Paleoclimatol*, 36, <https://doi.org/10.1029/2020PA004090>, 2021.
- 1105 Waltham, D.: Milankovitch period uncertainties and their impact on cyclostratigraphy., *Journal of Sedimentary Research*, 85, 990–998, <http://dx.doi.org/10.2110/jsr.2015.66>, 2015.
- Wei, R., Zhang, R., Li, M., Wang, X., and Jin, Z.: Obliquity forcing of lake-level changes and organic carbon burial during the Late Paleozoic Ice Age, *Global and Planetary Change*, 223, 104092, <https://doi.org/10.1016/j.gloplacha.2023.104092>, 2023.
- 1110 Wendler, J. E. and Wendler, I.: What drove sea-level fluctuations during the mid-Cretaceous greenhouse climate?, *Palaeogeography, Palaeoclimatology, Palaeoecology*, 441, 412–419, <https://doi.org/10.1016/j.palaeo.2015.08.029>, 2016.
- Wendler, J. E., Wendler, I., Vogt, C., and Kuss, J.: Link between cyclic eustatic sea-level change and continental weathering: Evidence for aquifer-eustasy in the Cretaceous, *Palaeogeography, Palaeoclimatology, Palaeoecology*, 441, 430–437, <https://doi.org/10.1016/j.palaeo.2015.08.014>, 2016.
- 1115 Wendt, J. and Belka, Z.: Age and depositional environment of upper devonian (early Frasnian to early famennian) black shales and limestones (Kellwasser facies) in the eastern Anti-Atlas, Morocco, *Facies*, 25, 51–89, <https://doi.org/10.1007/BF02536755>, 1991.
- Westphal, H.: Limestone–marl alternations as environmental archives and the role of early diagenesis: a critical review, *Int J Earth Sci (Geol Rundsch)*, 95, 947–961, <https://doi.org/10.1007/s00531-006-0084-8>, 2006.
- 1120 Westphal, H., Hilgen, F., and Munnecke, A.: An assessment of the suitability of individual rhythmic carbonate successions for astrochronological application., *Earth-Science Reviews*, 99, 19–30, <https://doi.org/10.1016/j.earscirev.2010.02.001>, 2010.
- Whalen, M. T., De Vleeschouwer, D., Payne, J. H., Day, J. E., Over, D. J., and Claeys, P.: Pattern and timing of the Late Devonian biotic crisis in Western Canada: insights from carbon isotopes and astronomical calibration of magnetic susceptibility data., *New Advances in Devonian Carbonates: Outcrop Analogs, Reservoirs, and Chronostratigraphy*, SEPM Special Publication, 107, 185–201, <http://dx.doi.org/10.2110/sepmsp.107.02>, 2017.
- 1125 Wilde, P. and Berry, W. B. N.: Destabilization of the oceanic density structure and its significance to marine “extinction” events, *Palaeogeography, Palaeoclimatology, Palaeoecology*, 48, 143–162, [https://doi.org/10.1016/0031-0182\(84\)90041-5](https://doi.org/10.1016/0031-0182(84)90041-5), 1984.



- 1130 de Winter, N. J., Sinnesael, M., Makarona, C., Vansteenberge, S., and Claeys, P.: Trace element analyses of carbonates using portable and micro-X-ray fluorescence: performance and optimization of measurement parameters and strategies, *J. Anal. At. Spectrom.*, 32, 1211–1223, <https://doi.org/10.1039/C6JA00361C>, 2017.
- Wintsch, R. P. and Kvale, C. M.: Differential Mobility of Elements in Burial Diagenesis of Siliciclastic Rocks, *SEPM JSR*, 64A, <https://doi.org/10.1306/D4267D9D-2B26-11D7-8648000102C1865D>, 1994.
- 1135 Young, G. M. and Nesbitt, H. W.: Processes controlling the distribution of Ti and Al in weathering profiles, siliciclastic sediments and sedimentary rocks, *Journal of Sedimentary Research*, 68, 448–455, <https://doi.org/10.2110/jsr.68.448>, 1998.
- Zhang, X., Joachimski, M. M., and Gong, Y.: Late Devonian greenhouse-icehouse climate transition: New evidence from conodont  $\delta^{18}\text{O}$  thermometry in the eastern Palaeotethys (Lali section, South China), *Chemical Geology*, 581, 120383, <https://doi.org/10.1016/j.chemgeo.2021.120383>, 2021.
- 1140 Zhang, Z., Huang, Y., Li, M., Li, X., Ju, P., and Wang, C.: Obliquity-forced aquifer-eustasy during the Late Cretaceous greenhouse world, *Earth and Planetary Science Letters*, 596, 117800, <https://doi.org/10.1016/j.epsl.2022.117800>, 2022.
- Zhou, M., Wu, H., Hinnov, L. A., Fang, Q., Zhang, S., Yang, T., and Shi, M.: Empirical reconstruction of Earth-Moon and Solar System dynamical parameters for the past 2.5 billion years from cyclostratigraphy, *Geophysical Research Letters*, 49, e2022GL098304, <https://doi.org/10.1029/2022GL098304>, 2022.

1145
